# Supplementary material for: Management of hyperglycaemia in persons with non-insulin-dependent type 2 diabetes mellitus who are started on systemic glucocorticoid therapy: a systematic review
Source: PubMed Central journal article supplement — BMJ Open. 2019 Jun 1;9(5):e028914. doi: 10.1136/bmjopen-2019-028914 (PMC6549610; doi:10.1136/bmjopen-2019-028914), 2019-06-01
Supplement: bmjopen-2019-028914.draft_revisions.pdf [file bmjopen-2019-028914.draft_revisions.pdf]

# BMJ Open

BMJ Open is committed to open peer review. As part of this commitment we make the peer review history of every article we publish publicly available.

When an article is published we post the peer reviewers' comments and the authors' responses online. We also post the versions of the paper that were used during peer review. These are the versions that the peer review comments apply to.

The versions of the paper that follow are the versions that were submitted during the peer review process. They are not the versions of record or the final published versions. They should not be cited or distributed as the published version of this manuscript.

BMJ Open is an open access journal and the full, final, typeset and author-corrected version of record of the manuscript is available on our site with no access controls, subscription charges or pay-per-view fees (<http://bmjopen.bmj.com>).

If you have any questions on BMJ Open's open peer review process please email [info.bmjopen@bmj.com](mailto:info.bmjopen@bmj.com)

# BMJ Open

## Management of hyperglycemia in persons with non-insulin-dependent Type 2 Diabetes mellitus that are started on systemic glucocorticoid therapy: a systematic review

|                               |                                                                                                                                                                                                                                                                                                                                                                                                                                                                                                                                                                                  |
|-------------------------------|----------------------------------------------------------------------------------------------------------------------------------------------------------------------------------------------------------------------------------------------------------------------------------------------------------------------------------------------------------------------------------------------------------------------------------------------------------------------------------------------------------------------------------------------------------------------------------|
| Journal:                      | <i>BMJ Open</i>                                                                                                                                                                                                                                                                                                                                                                                                                                                                                                                                                                  |
| Manuscript ID                 | bmjopen-2019-028914                                                                                                                                                                                                                                                                                                                                                                                                                                                                                                                                                              |
| Article Type:                 | Research                                                                                                                                                                                                                                                                                                                                                                                                                                                                                                                                                                         |
| Date Submitted by the Author: | 02-Jan-2019                                                                                                                                                                                                                                                                                                                                                                                                                                                                                                                                                                      |
| Complete List of Authors:     | Tatalovic, Milos; UniversitatsSpital Zurich, Department of Internal Medicine; Stadtspital Waid, Department of Internal Medicine<br>Lehmann, Roger; UniversitatsSpital Zurich, Department of Endocrinology, Diabetes and Clinical Nutrition<br>Nowak, Albina; UniversitatsSpital Zurich, Department of Endocrinology, Diabetes and Clinical Nutrition<br>Battegay, Edouard; UniversitatsSpital Zurich, Department of Internal Medicine; University of Zurich, Center of Competence Multimorbidity<br>Rampini, Silvana; UniversitatsSpital Zurich, Department of Internal Medicine |
| Keywords:                     | Type 2 Diabetes, hyperglycemia, glucocorticoid therapy, hypoglycemic agent, NPH insulin, BBI                                                                                                                                                                                                                                                                                                                                                                                                                                                                                     |
|                               |                                                                                                                                                                                                                                                                                                                                                                                                                                                                                                                                                                                  |

SCHOLARONE™  
Manuscripts

1  
2  
3 **1 Management of hyperglycemia in persons with non-insulin-**  
4  
5  
6 **2 dependent Type 2 Diabetes mellitus that are started on systemic**  
7  
8  
9 **3 glucocorticoid therapy: a systematic review**  
10  
11  
12

---

13  
14 **4 Running Title:** Management of glucocorticoid-induced hyperglycemia in Type 2 DM  
15

16 **5 Milos Tatalovic<sup>1,2</sup>, Roger Lehmann<sup>3</sup>, Albina Nowak<sup>3</sup>, Edouard Battegay<sup>1,4,5</sup>, Silvana K.**  
17  
18 **6 Rampini<sup>1</sup>**

19  
20  
21  
22 <sup>1</sup>Department of Internal Medicine, University Hospital Zurich, University of Zurich,  
23  
24 Rämistrasse 100, CH-8091 Zurich, Switzerland

25  
26  
27 <sup>2</sup>current affiliation: Stadt Zürich Stadtspital Waid, Tièchestrasse 99, 8037 Zurich, Switzerland

28  
29 <sup>3</sup>Department of Endocrinology, Diabetes and Clinical Nutrition, University Hospital Zurich,  
30  
31 Raemistrasse 100, 8091 Zurich, Switzerland

32  
33  
34 <sup>4</sup>Center of Competence Multimorbidity, University of Zurich, Switzerland

35  
36  
37 <sup>5</sup>University Research Priority Program Dynamics of Healthy Aging, University of Zurich,  
38  
39 Switzerland

40  
41  
42 **15 Corresponding author:** Silvana K. Rampini, Email: [silvana.rampini@usz.ch](mailto:silvana.rampini@usz.ch)  
43  
44  
45

46 **16 KEY WORDS**

47  
48  
49 Type 2 Diabetes, hyperglycemia, glucocorticoid therapy, hypoglycemic agent, insulin, NPH  
50  
51 insulin, long-acting insulin, BBI, SSI, multimorbidity, disease-disease medication interaction  
52  
53  
54  
55  
56  
57  
58  
59  
60

## 19 **ABSTRACT**

### 20 **Objectives**

21 To define the evidence-based best management of glucocorticoid-induced hyperglycemia in  
22 persons with Type 2 Diabetes mellitus (DM) who start glucocorticoid therapy.

### 23 **Data sources**

24 We searched Medline, Embase and Cochrane Library databases as well as Google for articles  
25 from 2002 to July 2018 using all search terms related to DM, glucocorticoids and treatment.

### 26 **Study selection**

27 Two authors screened articles for the notion “adult persons with Type 2 DM who received  
28 glucocorticoid therapy”, and evaluated identified articles according to predefined eligibility  
29 criteria. Randomized controlled trials and observational studies were included.

### 30 **Data collection and analysis**

31 One author extracted data from included articles and another checked extracted data. We  
32 assessed the risk of bias and overall quality of evidence and performed a qualitative, descriptive  
33 analysis.

### 34 **Results**

35 We ultimately included 8/2'365 screened articles, five open-label RCTs and three observational  
36 studies. All articles but one focused on inpatient insulin treatment. The included studies suggest  
37 standard basal-bolus insulin (BBI) treatment and compared it to various insulin strategies.  
38 However, study heterogeneity did not allow to systematically and quantitatively analyze  
39 specific insulin regimens. Thus, four studies examining intermediate-acting insulin as basal  
40 insulin did not find convincing advantages despite theoretical pharmacodynamical advantages

1  
2  
3 41 vis-à-vis long-acting insulin glargine. In addition, glycemic control with sliding scale insulin  
4  
5 42 (SSI) was inferior in two studies compared to BBI or intermediate-acting insulin. Two studies  
6  
7 43 suggest that pharmacodynamical profiles of insulins should be reconciled with corresponding  
8  
9 44 profiles of glucocorticoids. However, there is insufficient evidence for supporting this  
10  
11 45 recommendation. It is unclear, whether anticipatory outdoes compensatory insulin treatment.  
12  
13  
14

## 15 46 **Conclusion**

17  
18 47 Studies on treatment of glucocorticoid-induced hyperglycemia in Type 2 DM are  
19  
20 48 heterogeneous, and optimal insulin management remains uncertain. Hence, no specific insulin  
21  
22 49 regimen proved superior to another. Notwithstanding, we discourage SSI for use in this setting  
23  
24 50 and encourage aligning pharmacodynamics profiles of used glucocorticoids and insulin  
25  
26 51 treatment.  
27  
28  
29  
30

## 31 52 **STRENGTHS AND LIMITATIONS OF THIS STUDY:**

- 33  
34 53 • Systematic review approach with extensive literature search for a very common but  
35  
36 54 unresolved daily problem in managing Type 2 DM.  
37  
38 55 • The power to make firm conclusions is limited by the small number of available high quality  
39  
40 56 studies and the overall small number of study participants.  
41  
42 57 • Heterogeneity of included studies preclude a full quantitative analysis and to give formal  
43  
44 58 recommendations on a specific insulin regimen.  
45  
46  
47

48 59  
49  
50  
51  
52  
53  
54  
55  
56  
57  
58  
59  
60

## 60 INTRODUCTION

61 The number of persons with DM has grown globally from 108 million in 1980 to 422 million  
62 in 2014, *i.e.*, the global prevalence has almost doubled during this period from 4.7% to 8.5% <sup>1</sup>.

63 DM occurs in about 25-30% of hospitalized persons <sup>2</sup>, and DM management appears  
64 inappropriate in many of them <sup>3 4</sup>. In a retrospective cohort study, poor glycemic control  
65 correlated with higher hospitalization costs and associated with higher rates of DM-related  
66 hospital utilization per 100 patient-years <sup>5</sup>. In addition, persons with Type 2 DM had longer  
67 hospital stays and more hospitalizations directly related to complications of DM <sup>6</sup>. In an  
68 observational study, newly discovered hyperglycemia correlated with higher in-hospital  
69 mortality <sup>7</sup>. Hyperglycemia also related to more postoperative infections <sup>8</sup>, complications after  
70 transplantation <sup>9</sup> and increased mortality <sup>10</sup>.

71 Glucocorticoid therapy improves outcomes in respiratory diseases such as acutely exacerbated  
72 COPD, asthma, inflammatory or autoimmune disease, transplantat rejection and symptoms of  
73 chemotherapy <sup>11 12</sup>. In most cases, glucocorticoid regimens last less than 5 days. However, in  
74 22% of all cases, they remain prescribed for longer than 6 months <sup>13 14</sup>. In the UK, long-term  
75 glucocorticoid prescriptions irrespective of the diagnosis have increased by 34% over 20 years  
76 <sup>13</sup>. The prevalence of glucocorticoid use in hospitals is more than 10% of all admitted persons  
77 <sup>15</sup>. Thus, glucocorticoid treatment in persons with Type 2 DM is common and will steadily  
78 increase in parallel with increased prevalence of DM and better life expectancy of these persons.  
79 At the same time, many other diseases or conditions multiply in the same persons that interact  
80 with DM, *i.e.*, multi-morbidity <sup>16</sup>.

81 Glucocorticoids instantly increase basal endogenous glucose production and lower insulin  
82 sensitivity <sup>17-19</sup>, which leads to hyperglycemia. The rate of glucocorticoid-induced  
83 hyperglycemia or DM was 32.3% and 18.6% respectively in persons without prior DM on

1  
2  
3 84 glucocorticoid therapy given for more than one month<sup>20 21</sup>. The type and doses of administered  
4  
5 85 glucocorticoids vary widely and are tapered or stopped within days. Mostly, prednisolone intake  
6  
7 86 is in the morning and results in a pronounced elevation of blood glucose 4-8 hours later, *i.e.*, in  
8  
9 87 the afternoon and evening<sup>22 23</sup>. Thus, treatment will aim at controlling the hyperglycemia at  
10  
11  
12 88 these hours.

13  
14  
15 89 Recommendations promote the basal-bolus insulin (BBI) strategy for blood glucose control in  
16  
17 90 insulin dependent DM. BBI improves glycaemic control and reduces morbidity and mortality<sup>24-</sup>  
18  
19 91 <sup>26</sup>. Furthermore, BBI results in superior glucose control as compared to sliding-scale insulin  
20  
21 92 (SSI) regimens<sup>27</sup>. Plasma concentration of intermediate-acting Neutral Protamin Hagedorn  
22  
23 93 (NPH) insulin peaks 4-8 h after injection<sup>28</sup>. NPH insulin may therefore better control afternoon  
24  
25 94 peaks of blood glucose concentration caused by glucocorticoids than other insulins<sup>29</sup>.

26  
27  
28  
29 95 In this study, we have conducted a systematic review to define the best treatment options for  
30  
31 96 glycaemic control in persons with Type 2 DM on diet or OHA and on concomitant newly-  
32  
33 97 initiated glucocorticoid therapy. More specifically, we looked for the type of insulin  
34  
35 98 therapy/strategy that provides the best glycaemic control. In addition, we have evaluated whether  
36  
37 99 insulin started at the same time with glucocorticoids (anticipatory) or with a delay, *i.e.*, when  
38  
39 100 blood glucose level (BGL) rise above upper limits of normal (compensatory), confer better  
40  
41  
42  
43 101 results.

44  
45  
46 102

## 103 **METHODS**

### 104 **Protocol and registration**

105 Review methods and eligibility criteria were specified in advance, documented in a study  
106 protocol and registered online with the “International Prospective Register of Systematic  
107 Reviews” (PROSPERO), May 31<sup>st</sup> 2016 (Registration Number CRD42015024739) and  
108 recorded with a PRISMA statement<sup>30</sup>. We updated the protocol once on October 21<sup>st</sup> 2016, to  
109 broaden inclusion criteria.

### 110 **Eligibility Criteria**

111 For eligibility, we followed the PICOS criteria, i.e., **P**atients, **I**nterventions, **C**omparisons,  
112 **O**utcomes and **S**ettings<sup>30</sup>. **Patients:** We included articles on non-critically ill (non-ICU) in- or  
113 outpatients (> 16 years), who suffered from Type 2 DM treated with diet or OHA (*i.e.*,  
114 biguanide, gliflozins, gliptins, sulfonylureas, glinides, incretins or glitazones) and were started  
115 on a once or multiple daily oral or intravenous glucocorticoid therapy (*i.e.*, hydrocortisone,  
116 prednisone, prednisolone, methylprednisolone, dexamethasone, betamethasone or  
117 fludrocortisone) irrespective of the indication. **Interventions:** The articles and studies had to  
118 address specific treatment interventions for glycemic control, *e.g.* stop routine DM medication,  
119 starting insulin treatment, etc. **Comparisons:** We included all types of comparisons, *i.e.*,  
120 comparison of the study population to populations i) without DM, ii) without glucocorticoid  
121 treatment, iii) with adjusted OHA, or iv) with differing insulin treatments. **Outcomes:** We  
122 accepted outcomes reflecting glycemic control, *i.e.*, time outside target glucose range, mean  
123 BGL, hypo- or hyperglycemic episodes and daily insulin dose. **Settings:** We included  
124 randomized controlled trials (RCTs) and observational studies, *i.e.*, cohort studies, case-control  
125 studies or cross-sectional studies, without restriction to language, country of origin or  
126 publication types. We excluded letters to the editor and conference abstracts. We also consulted



1  
2  
3 127 guidelines, reviews and expert opinions. We considered only papers published after 2002  
4  
5 128 because of the introduction of long-acting insulin; long-acting insulins are, nowadays, an  
6  
7  
8 129 integral part of treatment in insulin dependent DM.  
9

### 10 11 130 **Search strategy**

12  
13  
14 131 We identified articles based on search terms related to DM and glucocorticoids in the following  
15  
16 132 databases: Medline and Pre-Medline using OVID, EMBASE and Cochrane Library electronic  
17  
18 133 databases (Supplementary Table 1). Additionally, we performed a Google search to retrieve  
19  
20 134 grey literature with exclusive focus on pdf-files. The search was conducted on July 8<sup>th</sup> 2016  
21  
22  
23 135 and updated on July 2<sup>nd</sup> 2018.  
24  
25

### 26 136 **Study Selection**

27  
28  
29 137 MT and SKR independently screened a pilot-set of 100 papers by studying the title and abstract  
30  
31 138 using the selection criteria ‘adult persons with preexisting DM that received a glucocorticoid  
32  
33 139 therapy’. If no abstract was available but the title seemed relevant, MT and SKR reviewed the  
34  
35  
36 140 full-text. One abstract was translated from Japanese. MT and SKR evaluated the first 100 papers  
37  
38 141 in consensus to determine consistent screening of all further papers. MT performed the  
39  
40 142 screening of all papers, and SKR independently double-screened a random sample of 10% of  
41  
42  
43 143 all articles. All articles were assigned to one of the three eligibility groups, *i.e.*, “Yes”, “No”  
44  
45 144 and “Maybe”. The “Maybe” group was discussed by MT and SKR for eligibility after full-text  
46  
47 145 review in a consensus conference. Initial review of eligible articles exposed the necessity for  
48  
49 146 modification of the inclusion criterion ‘ $\geq 20$  mg/d prednisolone-equivalent for  $\geq 5$  days’ to  
50  
51 147 ‘intermediate or high-dose glucocorticoid therapy’ since a large number of articles did not  
52  
53  
54 148 specify exact dosages of glucocorticoids. MT and SRK independently performed a full-text  
55  
56  
57 149 review of all eligible papers for inclusion considering the PICOS criteria. Disagreements  
58  
59  
60

1  
2  
3 150 between reviewers were resolved by consensus. Finally, the reference lists of all included  
4  
5 151 articles were screened for additional eligible papers, guidelines and review articles.  
6  
7

## 8 152 **Data extraction and quality assessment**

9  
10  
11 153 We extracted the following data from included articles: study population; participants; age.  
12  
13 154 Then we assessed indication, dosage and duration of glucocorticoid therapy; target glucose;  
14  
15 155 insulin strategy; the management of OHA interruption, continuation or adjustment of dosages;  
16  
17 156 outcome measures, *e.g.*, time in target glucose range, mean BGL, hypo- and hyperglycemic  
18  
19 157 episodes, insulin requirement. Differing assessments were discussed between MT and SKR.  
20  
21

22  
23 158 We used the Cochrane risk of bias tool <sup>31</sup> to evaluate the risk of bias in RCTs and observational  
24  
25 159 studies. The overall quality of evidence was assessed using the grading of recommendations  
26  
27 160 assessment, development and evaluation (GRADE) criteria <sup>32</sup>.  
28  
29

## 30 31 161 **Data synthesis**

32  
33  
34 162 We performed a descriptive analysis of RCTs and observational studies because the missing  
35  
36 163 concordance in study designs of articles on this topic precluded performing a meta-analysis.  
37  
38 164 Included articles were evaluated and compared in detail and findings summarized.  
39  
40

41 165  
42  
43  
44  
45  
46  
47  
48  
49  
50  
51  
52  
53  
54  
55  
56  
57  
58  
59  
60

## 166 **RESULTS**

### 167 **Study inclusion**

168 Our initial search provided 3'521 articles. 2'365 articles remained after eliminating duplicate  
169 entries. Of these 37 qualified for full text review. Eight articles met full eligibility criteria,  
170 namely, four RCTs <sup>33-36</sup> with open-label and parallel group design, one RCT with open-label  
171 and cross-over design <sup>37</sup>, and three observational studies <sup>38-40</sup> with retrospective cohort design  
172 (Fig. 1 and Table 1).

173 The eight studies had included a total of 481 persons, 343/481 persons with DM and 138/481  
174 persons with glucocorticoid-induced hyperglycemia. One study included persons with both  
175 Type 1 and 2 DM but did not take this distinction into consideration for outcomes <sup>33</sup>. At least  
176 85/481 persons had prior treatment with insulin; three studies did not provide this information  
177 <sup>33 34 39</sup>. Seven studies included inpatients only <sup>33-36 38-40</sup>, and one study both in- and outpatients  
178 <sup>37</sup>. Capillary blood glucose was measured four times a day, by continuous glucose monitoring,  
179 or by using all available capillary and serum blood glucose readings (Table 2). The upper limit  
180 was a BGL of 10mmol/l in all studies. The lower BGL limit was 3.9-4.5mmol/l in all but two  
181 studies, where it was 5.6mmol/l <sup>33 40</sup> (Table 2). Insulin dose adjustments were done if BGL was  
182 outside target glucose range according to specific study protocols.

183 In six studies, authors treated control groups with a BBI regimen using insulin glargine as basal  
184 insulin <sup>33-36 38 39</sup>, in one study with a BBI regimen using twice-daily insulin detemir <sup>40</sup> and SSI  
185 added to established DM medication in one other study <sup>37</sup>. Strikingly, treatment interventions  
186 in experimental groups diverged substantially: One study compared glycemic control of BBI  
187 regimen in persons with Type 2 DM without prednisolone to those with prednisolone treatment  
188 <sup>38</sup>. Another study compared glycemic control of BBI regimen to SSI regimen <sup>40</sup>. One study  
189 compared addition of SSI to routine DM medication with the addition of intermediate-acting

1  
2  
3 190 insulin<sup>37</sup>. Three studies compared BBI regimens with long-acting insulins to BBI regimens  
4  
5 191 with NPH insulin<sup>35 36 39</sup> but in one of these studies NPH was given in three equal prandial doses  
6  
7 192<sup>36</sup>. One study compared BBI regimen with long-acting insulin to the same regimen adding NPH  
8  
9 193 insulin<sup>34</sup>. Finally, the latest study added the insulin type which matched the glycemic profile  
10  
11 194 of the glucocorticoid administered<sup>33</sup>. This divergence in study designs of RCTs precluded a  
12  
13 195 clean and coherent quantitative meta-analysis.  
14  
15  
16  
17

### 18 196 **BBI strategy in persons under systemic glucocorticoid therapy**

19  
20 197 Two observational studies<sup>38 40</sup> support BBI to be superior in glucocorticoid-treated persons  
21  
22 198 with Type 2 DM<sup>41 42</sup>. Gosmanov *et al.*<sup>40</sup> found more hyperglycemic events in persons with  
23  
24 199 Type 2 DM under dexamethasone for 3 days for a hematologic malignancy when treated with  
25  
26 200 SSI therapy than in those with a BBI therapy (Table 2). In the SSI group, mean daily BGL was  
27  
28 201 significantly higher ( $p < 0.001$ ) and average insulin requirement was significantly lower  
29  
30 202 ( $p < 0.001$ ). No hypoglycemic events occurred in either groups but 3/28 (11%) persons treated  
31  
32 203 with SSI were referred to an intensive care unit (ICU) because of hyperglycemic events.  
33  
34  
35  
36

37 204 Burt *et al.*<sup>38</sup> studied the effectiveness of a BBI regimen in hospitalized persons with Type 2  
38  
39 205 DM treated with prednisolone in the morning for an acute medical condition compared to  
40  
41 206 persons without glucocorticoid treatment. Half of the calculated daily dose (0.3-0.4 IU/kg) was  
42  
43 207 given as long-acting insulin Glargine at 9 pm and half as bolus evenly split into three meal  
44  
45 208 dosages of rapid-acting insulin with additional correctional insulin if necessarily. Mean daily  
46  
47 209 BGL was significantly higher in the prednisolone group ( $p < 0.001$ ) (Table 2). More specifically,  
48  
49 210 BGL was significantly higher at 5 and 9 pm but not significantly higher at 7 and 12 am. In  
50  
51 211 addition, the daily insulin dose was significantly higher in the prednisolone-treated group than  
52  
53 212 in the control group, especially at 12 am and 5 pm. Thus, BBI treatment did not provide a  
54  
55 213 sufficient glucose control most notably in the afternoon and evening.  
56  
57  
58  
59  
60

## 214 **Comparison of BBI regimen with long-acting insulin to NPH as basal insulin**

215 Two RCTs <sup>36 35</sup> and one observational study <sup>39</sup> compared NPH insulin with the long-acting  
216 insulin Glargine in a BBI regimen for their efficacy to control BGL in hospitalized persons  
217 treated with medium- to high-dose glucocorticoids <sup>36 39</sup>. The studies differed substantially in  
218 their design (Table 1). Radhakutty *et al.* <sup>35</sup> included persons with or without Type 2 DM treated  
219 with a single dose of glucocorticoids for respiratory disease or gout. Glargine in control and  
220 NPH in experimental group was administered at 7 am. Ruiz de Adana *et al.* <sup>36</sup> studied persons  
221 with Type 2 DM receiving multiple daily doses of glucocorticoids for respiratory disease. The  
222 Glargine group received its basal insulin as one dose at 9 am, and the NPH group received it  
223 before breakfast, lunch and dinner in three equal doses. Dhital *et al.* <sup>39</sup> retrospectively studied  
224 adults treated with prednisone, who were on a BBI regimen with either insulin glargine or NPH.  
225 Notably, the target glucose range, the time of application and number of doses of basal insulins  
226 were not indicated here, and persons with hyperglycemia without underlying Type 2 DM were  
227 also included.

228 All three studies show a similar overall glycemic control for NPH or Glargine as basal insulin  
229 <sup>35 36 39</sup>. More specifically, the mean daily BGL and the number of mild hypoglycemic episodes  
230 per day were similar (Table 2). Notably, severe hypoglycemia (BGL < 2.22 mmol/l) occurred  
231 in two persons in the NPH group in the study by Ruiz de Adana *et al.* <sup>36</sup>. Only Dhital *et al.* <sup>39</sup>  
232 found significantly lower daily insulin requirement in the NPH group.

## 233 **Addition of insulin to established DM medication**

234 Gerards *et al.* <sup>37</sup> compared addition of SSI insulin vs. intermediate-acting insulin (IMI) to  
235 established DM medication for glycemic control. The types of insulin were not further defined.  
236 Half of the persons had prior insulin treatment. Addition of IMI resulted in significantly longer  
237 time in target glucose range (p<0.001) and lower mean daily BGL (p<0.05). This was achieved

238 with an increased insulin requirement in IMI group. Remarkably, mean daily BGL of both  
239 groups (SSI  $13.5 \pm 2.8$ , IMI  $12.4 \pm 2.9$ ) were higher than in all other studies (Table 2).

240 Two RCTs added insulin to an existing BBI regimen in persons with or without Type 2 DM <sup>33</sup>  
241 <sup>34</sup> (Table 1). Grommesh *et al.* <sup>34</sup> studied the addition of NPH insulin along with a glucocorticoid  
242 to a BBI regimen. The algorithm for NPH dosing based on glucocorticoid type, dose and prior  
243 DM diagnosis. There was no advantage in doing so, neither for glycemic control, mean total  
244 daily insulin dose nor hypo- and hyperglycemia (Table 2). Similarly, a RCT by Lakhani *et al.*  
245 <sup>33</sup> studied the addition of a so-called ‘correctional insulin’ along with the glucocorticoid to a  
246 BBI regimen. The type of ‘correctional insulin’ matched the glycemic profile of the type of  
247 glucocorticoid administered, *e.g.* NPH insulin for prednisolone or insulin glargine for  
248 dexamethasone treatment <sup>33</sup>. ‘Correctional insulin’ significantly improved “time in target pre-  
249 meal glucose range” defined as 5.6-10mmol/l ( $p=0.002$ ) and mean daily BGL ( $p=0.0001$ ), but  
250 not time in “bedtime target glucose range” ( $p=0.09$ ). The hyperglycemic events were reduced  
251 ( $p<0.001$ ). No data on subgroups without DM or with Type 1 DM as well as data on daily  
252 insulin doses were given.

### 253 **Anticipatory or compensatory approach to glycemic control**

254 We had wanted to study whether anticipatory or compensatory adjustments are superior for  
255 glycemic control. No screened or included study did address this issue. While screening articles,  
256 we found some recommendations concerning this issue in guidelines <sup>41 43-45</sup> and reviews <sup>2 46-49</sup>,  
257 which we comment in the discussion section.

### 258 **Risk of bias and grading of evidence**

259 Risk of bias was assessed in five RCTs for seven domains and four outcomes (mean BGL, time  
260 in target glucose, daily insulin dose and hypoglycemia) (Supplementary table 2a). All RCTs  
261 were un-blinded for participants and personal. Although placebo effects are very unlikely, un-

1  
2  
3 262 blinding may have affected the attention of staff. This might be the most relevant risk for bias  
4  
5 263 in these studies. The lack of or the lack of description of random sequence generation and  
6  
7 264 allocation concealment might be another common bias. The three observational studies were  
8  
9  
10 265 divided in low <sup>38</sup>, middle <sup>39</sup> and high <sup>40</sup> range of risk of bias (Supplementary table 2b). The most  
11  
12 266 common risk of bias was the failure to control confounding.

13  
14  
15 267 Applying the GRADE criteria on each individual study, we had to decrease the level of evidence  
16  
17 268 for the primary outcomes “mean BGL” and “time in target glucose range” mainly because of  
18  
19 269 risk of bias and publication bias but also for inconsistency and imprecision in the five RCTs  
20  
21  
22 270 and one observational study (Supplementary Table 3). Hence, we classified the overall quality  
23  
24 271 of evidence for the individual interventions as moderate <sup>33 36 37</sup>, low <sup>35 38 39</sup> or very low <sup>34 40</sup>.

## 272 DISCUSSION

273 Glucocorticoid treatment inevitably causes hyperglycemia in persons with Type 2 DM. Here,  
274 we have systematically reviewed the evidence on strategies for best glycaemic control in this  
275 predictable and detrimental disease-disTypeease medication interaction. We found that: i)  
276 Optimal insulin management in glucocorticoid-induced hyperglycemia in Type 2 DM remains  
277 uncertain. We lack high quality of evidence studies to make formal and final recommendations.  
278 Evidence so far is very low to moderate. ii) The studies suggest to use BBI without preference  
279 for long-or intermediate-acting insulin as basal insulin but SSI to be abandoned. iii) Two studies  
280 suggest that pharmacodynamic profiles of insulins should be reconciled with corresponding  
281 profiles of glucocorticoids. However, there is insufficient evidence to recommend this. iv) It is  
282 unclear, whether one should initiate anticipatory or compensatory insulin treatment.

283 Five open label RCTs and three observational studies included in this systematic review address  
284 the issue of this review. BBI is widely accepted as intensive insulin therapy in DM. The question  
285 remains, however, whether BBI performs best in Type 2 DM under glucocorticoid treatment.  
286 Gosmanov *et al.*<sup>40</sup> shows that BBI exceeds SSI in terms of glycaemic control. This is in line  
287 with data showing the superiority of BBI to SSI in controlling hyperglycemia in various clinical  
288 settings<sup>27 50</sup>. Regarding SSI, Gerards *et al.*<sup>37</sup> corroborates inferiority of SSI to IMI as addition  
289 to routine DM regimen. Thus, SSI treatment, although very popular among non-  
290 endocrinologists, should not be prescribed anymore in this setting. Nevertheless, Burt *et al.*<sup>38</sup>  
291 found insufficient glycaemic control at 5pm and 9pm with BBI with long-acting insulin in  
292 persons with Type 2 DM treated with prednisolone compared to Type 2 DM without  
293 prednisolone. These findings are in line with previous descriptions of afternoon and evening  
294 hyperglycemia under glucocorticoids in persons without DM<sup>22 23 51</sup>. Thus, BBI with long-  
295 acting insulin is not the ultimate solution.



1  
2  
3 296 NPH insulin controls afternoon peaks of blood glucose caused by glucocorticoids well <sup>29</sup> and  
4  
5 297 might have advantages over long-acting insulin because of a similar timeline of its effects to  
6  
7 298 glucocorticoids on hyperglycemia. Three included articles <sup>35 36 39</sup> compared NPH insulin to  
8  
9 299 insulin Glargine as basal insulin in a BBI treatment in a randomized controlled <sup>36 35</sup> resp.  
10  
11 300 retrospective <sup>39</sup> manner and found no significant differences in glycemic control. However,  
12  
13 301 NPH insulin caused more hypoglycemic events when NPH and bolus insulin were administered  
14  
15 302 in equally divided pre-prandial doses for controlling hyperglycemia in persons given multiple  
16  
17 303 daily doses of glucocorticoids <sup>36</sup>. Such a protocol may be poorly flexible and may not  
18  
19 304 sufficiently consider the night-time fasting period with risk of nocturnal hypoglycemia. Insulin  
20  
21 305 requirement, however, was higher in BBI with long-acting insulin compared to NPH as basal  
22  
23 306 insulin in two studies <sup>36 39</sup> but similar in the other study <sup>35</sup>. Addition of NPH along with the  
24  
25 307 glucocorticoid to BBI treatment did not improve glycemic control either <sup>34</sup>. The most recent  
26  
27 308 study by Lakhani *et al.* <sup>33</sup> suggests a unique approach to fit the pharmacodynamical properties  
28  
29 309 of insulins and glucocorticoids. This elaborated approach resulted in significantly lower mean  
30  
31 310 daily BGL and pre-meal time in target glucose range. This appears promising but needs  
32  
33 311 corroboration in a larger study.

34  
35 312 We found no primary data on anticipatory versus compensatory treatment adjustments for  
36  
37 313 glycemic control when starting glucocorticoids. This lack of data causes partially controversial  
38  
39 314 expert opinions in guidelines. The American Endocrine Society Clinical Practice Guidelines <sup>41</sup>  
40  
41 315 recommends an anticipatory approach with discontinuation of OHA at the time of hospital  
42  
43 316 admission and initiation of insulin with persistent hyperglycemia. Exceptionally, selected  
44  
45 317 persons who are stable, regularly eating and have no contraindication “may be candidates for  
46  
47 318 continuation of previously prescribed OHA”. The Canadian Diabetes Association guideline <sup>45</sup>  
48  
49 319 recommends that “glycemic monitoring for 48 hours after initiation of steroids may be  
50  
51 320 considered”. In contrast the Joint British Diabetes Societies for inpatient care guideline <sup>43</sup> and  
52  
53  
54  
55  
56  
57  
58  
59  
60

1  
2  
3 321 the Imperial College Clinical Guidance<sup>44</sup> recommend to up-titrate OHA first. They recommend  
4  
5 322 to add<sup>43</sup> or switch<sup>44</sup> to insulin if BGL remains above 10mmol/l. Experience or evidence to  
6  
7 323 suggest the use of DDP-4 inhibitors, GLP-1 receptor agonists or SGLT-2 inhibitors is missing.  
8  
9  
10 324 The strength of our systematic review is the extensive literature search for a common practical  
11  
12 325 but unresolved problem in managing DM. Our systematic analysis also precludes premature  
13  
14 326 conclusions on the preferred approach to insulin therapy, *e.g.*, based on theoretical  
15  
16 327 considerations of pharmacodynamics or due to publication bias. The thorough evaluation of  
17  
18 328 evidence level indicates moderate to very low evidence for single approaches.  
19  
20  
21  
22 329 The major limitation for answering the questions raised in this study is the heterogeneity of the  
23  
24 330 experimental designs and the lack of highly powered, high quality studies. Populations,  
25  
26 331 interventions, target glucose levels and glucose monitoring all differed from study to study.  
27  
28 332 This permits a descriptive review only, and precludes formal recommendations. We need more  
29  
30 333 well-designed studies with more homogeneous patient populations. Our study has specifically  
31  
32 334 focused on persons with known Type 2 DM without prior insulin treatment. Still our analysis  
33  
34 335 centers on mixed populations, namely persons with Type 2 DM with and without prior insulin  
35  
36 336 treatment or Type 1 DM. Data on these subgroups are not available. It is also unlikely that a  
37  
38 337 ‘one size fits all’ approach solves all challenges in all DM phenotypes.  
39  
40  
41  
42  
43  
44

## 45 338 **CONCLUSION**

46  
47  
48 339 Hyperglycemia in persons with Type 2 DM initiated on glucocorticoids is highly predictable.  
49  
50 340 Nevertheless, therapeutic strategies infrequently address glycemic control in persons started on  
51  
52 341 glucocorticoids in daily practice. Unfortunately, RCTs and observational studies on this topic  
53  
54 342 show heterogeneous approaches in diverse populations. Therefore, we were not able to conduct  
55  
56 343 a meta-analysis. Nevertheless, we can favor the use of a BBI regimen based on several  
57  
58 344 corresponding studies as the most appropriate solution in controlling hyperglycemia in persons  
59  
60

1  
2  
3 345 with DM initiated on glucocorticoid therapy <sup>34 36 38-40</sup>. Furthermore, based on two studies <sup>33 37</sup>  
4  
5 346 we feel that matching pharmacodynamics profiles of insulins to glycemic profiles of the used  
6  
7 347 glucocorticoid might be beneficial for glycemic control. Based on our systematic review, we  
8  
9  
10 348 strongly support the call to action on research in inpatient DM management of The PRIDE  
11  
12 349 group <sup>52</sup> and to expend this to outpatient care. A concerted effort of Diabetes Societies would  
13  
14 350 be needed to elaborate powerful study designs taking into account different DM phenotypes,  
15  
16  
17 351 settings and treatment approaches. If so, we recommend to focus on an approach adjusted for  
18  
19 352 insulin-glucocorticoid pharmacodynamics.  
20  
21  
22 353

1  
2  
3 354 **DECLARATIONS**  
4  
5

6  
7 355 **Competing interests**  
8  
9

10 356 The authors have no competing interests to declare.  
11  
12

13 357 **Funding**  
14  
15

16 358 SKR was supported by a personal development grant from University Hospital Zurich.  
17  
18

19 359 **Authors contributions**  
20  
21

22 360 MT drafted the study, contributed to the development of the selection criteria and data  
23  
24 361 extraction criteria, developed the search strategy, elaborated the study selection, data extraction  
25  
26 362 and data synthesis, wrote the manuscript, provided feedback and approved the final manuscript.  
27  
28

29 363 RL provided expertise on DM, read the manuscript, provided feedback and approved the final  
30  
31 364 manuscript.  
32  
33

34 365 AN read, provided feedback and approved the final manuscript.  
35  
36

37 366 EB drafted the study, contributed to the development of the selection criteria and data extraction  
38  
39 367 criteria, read the manuscript, provided feedback and approved the final manuscript.  
40  
41

42 368 SKR is the guarantor, drafted the study, contributed to the development of the selection criteria  
43  
44 369 and data extraction criteria, did the study selection, data extraction and data synthesis, wrote  
45  
46 370 the manuscript, provided feedback and approved the final manuscript.  
47  
48

49  
50 371 **Acknowledgements**  
51  
52

53 372 We thank Martina Gosteli (MG), University of Zurich, for assistance in constructing the  
54  
55 373 database.  
56  
57  
58  
59  
60

1  
2  
3  
4  
5  
6  
7  
8  
9  
10  
11  
12  
13  
14  
15  
16  
17  
18  
19  
20  
21  
22  
23  
24  
25  
26  
27  
28  
29  
30  
31  
32  
33  
34  
35  
36  
37  
38  
39  
40  
41  
42  
43  
44  
45  
46  
47  
48  
49  
50  
51  
52  
53  
54  
55  
56  
57  
58  
59  
60

374 **Data sharing statement**

375 All available data is included into the manuscript.

For peer review only

376 **REFERENCES**

- 377 1. WHO. Global Health Report on Diabetes. 2016:1-87.
- 378 2. Gosmanov AR. A practical and evidence-based approach to management of inpatient diabetes in  
379 non-critically ill patients and special clinical populations. *Journal of Clinical & Translational*  
380 *Endocrinology* 2016;5:1-6. doi: <https://doi.org/10.1016/j.jcte.2016.05.002>
- 381 3. Wallymahmed ME, Dawes S, Clarke G, et al. Hospital in-patients with diabetes: increasing prevalence  
382 and management problems. *Diabet Med* 2005;22(1):107-9. doi: 10.1111/j.1464-  
383 5491.2004.01355.x [published Online First: 2004/12/21]
- 384 4. Hirsch IB. Sliding scale insulin--time to stop sliding. *Jama* 2009;301(2):213-4. doi:  
385 10.1001/jama.2008.943 [published Online First: 2009/01/15]
- 386 5. Menzin J, Korn JR, Cohen J, et al. Relationship between glycemic control and diabetes-related  
387 hospital costs in patients with type 1 or type 2 diabetes mellitus. *Journal of managed care*  
388 *pharmacy : JMCP* 2010;16(4):264-75. doi: 10.18553/jmcp.2010.16.4.264 [published Online  
389 First: 2010/05/04]
- 390 6. Khalid JM, Raluy-Callado M, Curtis BH, et al. Rates and risk of hospitalisation among patients with  
391 type 2 diabetes: retrospective cohort study using the UK General Practice Research Database  
392 linked to English Hospital Episode Statistics. *International Journal of Clinical Practice*  
393 2014;68(1):40-48. doi: 10.1111/ijcp.12265
- 394 7. Umpierrez GE, Isaacs SD, Bazargan N, et al. Hyperglycemia: an independent marker of in-hospital  
395 mortality in patients with undiagnosed diabetes. *J Clin Endocrinol Metab* 2002;87(3):978-82.  
396 doi: 10.1210/jcem.87.3.8341 [published Online First: 2002/03/13]
- 397 8. Pomposelli JJ, Baxter JK, 3rd, Babineau TJ, et al. Early postoperative glucose control predicts  
398 nosocomial infection rate in diabetic patients. *JPEN Journal of parenteral and enteral nutrition*  
399 1998;22(2):77-81. [published Online First: 1998/04/07]
- 400 9. Bloom RD, Crutchlow MF. Transplant-associated hyperglycemia. *Transplantation Reviews*  
401 2008;22(1):39-51.
- 402 10. Inzucchi SE. Management of hyperglycemia in the hospital setting. *New England Journal of*  
403 *Medicine* 2006;355(18):1903-11.
- 404 11. Vu K, Busaidy N, Cabanillas ME, et al. A randomized controlled trial of an intensive insulin regimen  
405 in patients with hyperglycemic acute lymphoblastic leukemia. *Clinical Lymphoma, Myeloma*  
406 *and Leukemia* 2012;12(5):355-62.
- 407 12. Ghisdal L, Van Laecke S, Abramowicz MJ, et al. New-onset diabetes after renal transplantation: Risk  
408 assessment and management. *Diabetes Care* 2012;35(1):181-88.
- 409 13. Fardet L, Petersen I, Nazareth I. Prevalence of long-term oral glucocorticoid prescriptions in the UK  
410 over the past 20 years. *Rheumatology (Oxford)* 2011;50(11):1982-90. doi:  
411 10.1093/rheumatology/ker017 [published Online First: 2011/03/12]
- 412 14. Wood-Baker RR, Gibson PG, Hannay M, et al. Systemic corticosteroids for acute exacerbations of  
413 chronic obstructive pulmonary disease. *Cochrane database of systematic reviews (Online)*  
414 2005(1):CD001288.
- 415 15. Narwani V, Swafe L, Stavrika C, et al. How frequently are bedside glucose levels measured in  
416 hospital inpatients on glucocorticoid treatment? *Clinical Medicine, Journal of the Royal College*  
417 *of Physicians of London* 2014;14(3):327-28.
- 418 16. Barnett K, Mercer SW, Norbury M, et al. Epidemiology of multimorbidity and implications for health  
419 care, research, and medical education: a cross-sectional study. *The Lancet* 2012;380(9836):37-  
420 43. doi: [https://doi.org/10.1016/S0140-6736\(12\)60240-2](https://doi.org/10.1016/S0140-6736(12)60240-2)
- 421 17. Van Raalte DH, Nofrate V, Bunck MC, et al. Acute and 2-week exposure to prednisolone impair  
422 different aspects of (beta)-cell function in healthy men. *European Journal of Endocrinology*  
423 2010;162(4):729-35.

1  
2  
3  
4  
5  
6  
7  
8  
9  
10  
11  
12  
13  
14  
15  
16  
17  
18  
19  
20  
21  
22  
23  
24  
25  
26  
27  
28  
29  
30  
31  
32  
33  
34  
35  
36  
37  
38  
39  
40  
41  
42  
43  
44  
45  
46  
47  
48  
49  
50  
51  
52  
53  
54  
55  
56  
57  
58  
59  
60

- 424 18. Van Raalte DH, Brands M, Van Der Zijl NJ, et al. Low-dose glucocorticoid treatment affects multiple  
425 aspects of intermediary metabolism in healthy humans: A randomised controlled trial.  
426 *Diabetologia* 2011;54(8):2103-12.
- 427 19. Geer EB, Islam J, Buettner C. Mechanisms of glucocorticoid-induced insulin resistance: Focus on  
428 adipose tissue function and lipid metabolism. *Endocrinology and Metabolism Clinics of North  
429 America* 2014;43(1):75-102.
- 430 20. Liu XX, Zhu XM, Miao Q, et al. Hyperglycemia induced by glucocorticoids in nondiabetic patients: a  
431 meta-analysis. *Annals of nutrition & metabolism* 2014;65(4):324-32. doi: 10.1159/000365892  
432 [published Online First: 2014/11/18]
- 433 21. Vidler J, Rogers C, Yallop D, et al. Outpatient management of steroid-induced hyperglycaemia and  
434 steroid-induced diabetes in people with lymphoproliferative disorders treated with  
435 intermittent high dose steroids. *J Clin Transl Endocrinol* 2017;9:18-20. doi:  
436 10.1016/j.jcte.2017.06.003 [published Online First: 2017/10/27]
- 437 22. Yuen KCJ, McDaniel PA, Riddle MC. Twenty-four-hour profiles of plasma glucose, insulin, C-peptide  
438 and free fatty acid in subjects with varying degrees of glucose tolerance following short-term,  
439 medium-dose prednisone (20 mg/day) treatment: Evidence for differing effects on insulin  
440 secretion and action. *Clinical Endocrinology* 2012;77(2):224-32.
- 441 23. Burt MG, Roberts GW, Aguilar-Loza NR, et al. Continuous monitoring of circadian glycemic patterns  
442 in patients receiving prednisolone for COPD. *J Clin Endocrinol Metab* 2011;96(6):1789-96. doi:  
443 10.1210/jc.2010-2729 [published Online First: 2011/03/18]
- 444 24. Umpierrez GE, Smiley D, Zisman A, et al. Randomized study of basal-bolus insulin therapy in the  
445 inpatient management of patients with type 2 diabetes (RABBIT 2 Trial). *Diabetes Care*  
446 2007;30(9):2181-86.
- 447 25. Association AD. Standards of medical care in diabetes. 2015
- 448 26. Umpierrez GE, Hellman R, Korytkowski MT, et al. Management of hyperglycemia in hospitalized  
449 patients in non-critical care setting: An endocrine society clinical practice guideline. *Journal of  
450 Clinical Endocrinology and Metabolism* 2012;97(1):16-38.
- 451 27. Roberts GW, Aguilar-Loza N, Esterman A, et al. Basal-bolus insulin versus sliding-scale insulin for  
452 inpatient glycaemic control: a clinical practice comparison. *The Medical journal of Australia*  
453 2012;196(4):266-9. [published Online First: 2012/03/14]
- 454 28. Lepore M, Pampanelli S, Fanelli C, et al. Pharmacokinetics and pharmacodynamics of subcutaneous  
455 injection of long-acting human insulin analog glargine, NPH insulin, and ultralente human  
456 insulin and continuous subcutaneous infusion of insulin lispro. *Diabetes* 2000;49(12):2142-8.  
457 [published Online First: 2000/12/16]
- 458 29. Seggelke SA, Gibbs J, Draznin B. Pilot study of using neutral protamine Hagedorn insulin to  
459 counteract the effect of methylprednisolone in hospitalized patients with diabetes. *Journal of  
460 hospital medicine* 2011;6(3):175-6. doi: 10.1002/jhm.874 [published Online First: 2011/03/10]
- 461 30. Shamseer L, Moher D, Clarke M, et al. Preferred reporting items for systematic review and meta-  
462 analysis protocols (PRISMA-P) 2015: elaboration and explanation. *BMJ (Clinical research ed)*  
463 2015;349:g7647. doi: 10.1136/bmj.g7647 [published Online First: 2015/01/04]
- 464 31. Higgins JP, Altman D. Assessing the risk of bias in included studies. . *Higgins JPT, Green S (editors)*  
465 *Cochrane Handbook for Systematic Reviews of Interventions Version 510 [updated March  
466 2011] The Cochrane Collaboration, 2011*; :33-49.
- 467 32. Guyatt G, Oxman AD, Akl EA, et al. GRADE guidelines: 1. Introduction—GRADE evidence profiles  
468 and summary of findings tables. *Journal of Clinical Epidemiology* 2011;64(4):383-94. doi:  
469 <https://doi.org/10.1016/j.jclinepi.2010.04.026>
- 470 33. Lakhani OJ, Kumar S, Tripathi S, et al. Comparison of Two Protocols in the Management of  
471 Glucocorticoid-induced Hyperglycemia among Hospitalized Patients. *Indian J Endocrinol  
472 Metab* 2017;21(6):836-44. doi: 10.4103/ijem.IJEM\_226\_17 [published Online First:  
473 2017/12/30]



- 1  
2  
3 474 34. Grommesh B, Lausch MJ, Vannelli AJ, et al. HOSPITAL INSULIN PROTOCOL AIMS FOR GLUCOSE  
4 475 CONTROL IN GLUCOCORTICOID-INDUCED HYPERGLYCEMIA. *Endocrine Practice*  
5 476 2015;22(2):180-89. doi: 10.4158/EP15818.OR  
6 477  
7 478 35. Radhakutty A, Stranks JL, Mangelsdorf BL, et al. Treatment of prednisolone-induced  
8 479 hyperglycaemia in hospitalized patients: Insights from a randomized, controlled study.  
9 480 *Diabetes Obes Metab* 2017;19(4):571-78. doi: 10.1111/dom.12859 [published Online First:  
10 481 2016/12/21]  
11 482  
12 483 36. Ruiz de Adana MS, Colomo N, Maldonado-Araque C, et al. Randomized clinical trial of the efficacy  
13 484 and safety of insulin glargine vs. NPH insulin as basal insulin for the treatment of glucocorticoid  
14 485 induced hyperglycemia using continuous glucose monitoring in hospitalized patients with type  
15 486 2 diabetes and respiratory disease. *Diabetes Research and Clinical Practice* 2015;110(2):158-  
16 487 65.  
17 488 37. Gerards MC, de Maar JS, Steenbruggen TG, et al. Add-on treatment with intermediate-acting insulin  
18 489 versus sliding-scale insulin for patients with type 2 diabetes or insulin resistance during cyclic  
19 490 glucocorticoid-containing antineoplastic chemotherapy: a randomized crossover study.  
20 491 *Diabetes Obes Metab* 2016;18(10):1041-4. doi: 10.1111/dom.12694 [published Online First:  
21 492 2016/05/19]  
22 493  
23 494 38. Burt MG, Drake SM, Aguilar-Loza NR, et al. Efficacy of a basal bolus insulin protocol to treat  
24 495 prednisolone-induced hyperglycaemia in hospitalised patients. *Internal Medicine Journal*  
25 496 2015;45(3):261-66.  
26 497  
27 498 39. Dhital SM, Shenker Y, Meredith M, et al. A retrospective study comparing neutral protamine  
28 499 hagedorn insulin with glargine as basal therapy in prednisone-associated diabetes mellitus in  
29 500 hospitalized patients. *Endocrine Practice* 2012;18(5):712-19.  
30 501  
31 502 40. Gosmanov AR, Goorha S, Stelts S, et al. Management of hyperglycemia in diabetic patients with  
32 503 hematologic malignancies during dexamethasone therapy. *Endocrine Practice* 2013;19(2):231-  
33 504 35.  
34 505  
35 506 41. Umpierrez GE, Hellman R, Korytkowski MT, et al. Management of hyperglycemia in hospitalized  
36 507 patients in non-critical care setting: an endocrine society clinical practice guideline. *J Clin*  
37 508 *Endocrinol Metab* 2012;97(1):16-38. doi: 10.1210/jc.2011-2098 [published Online First:  
38 509 2012/01/10]  
39 510  
40 511 42. AmericanDiabetesAssociation. Standards of Medical Care in Diabetes. *Diabetes Care* 2016;39(Suppl  
41 512 1):1-119.  
42 513  
43 514 43. JBDS-IP JBDSfIC. Management of Hyperglycaemia and Steroid (Glucocorticoid) Therapy.  
44 515 [www.diabetologists-abcdorqk.com/JBDS/JBDShtm](http://www.diabetologists-abcdorqk.com/JBDS/JBDShtm) 2014  
45 516  
46 517 44. Jairam Carol NO. Steroid Therapy and Management of Hyperglycaemia. 2010  
47 518  
48 519 45. Malcolm J, Halperin I, Miller DB, et al. In-Hospital Management of Diabetes. *Canadian Journal of*  
49 520 *Diabetes* 2018;42:S115-S23. doi: <https://doi.org/10.1016/j.cjcd.2017.10.014>  
50 521  
51 522 46. Clore JN, Thurby-Hay L. Glucocorticoid-induced hyperglycemia. *Endocr Pract* 2009;15(5):469-74.  
52 523 doi: 10.4158/ep08331.rar [published Online First: 2009/05/21]  
53 524  
54 525 47. Baldwin D, Apel J. Management of hyperglycemia in hospitalized patients with renal insufficiency  
55 526 or steroid-induced diabetes. *Current Diabetes Reports* 2013;13(1):114-20.  
56 527  
57 528 48. Suh S, Park MK. Glucocorticoid-Induced Diabetes Mellitus: An Important but Overlooked Problem.  
58 529 *Endocrinology and metabolism (Seoul, Korea)* 2017 [published Online First: 2017/05/31]  
59 530  
60 531 49. Khazai NB, Hamdy O. Inpatient Diabetes Management in the Twenty-First Century. *Endocrinology*  
61 532 *and Metabolism Clinics of North America* 2016;45(4):875-94. doi:  
62 533 <https://doi.org/10.1016/j.ecl.2016.06.013>  
63 534  
64 535 50. Browning LA, Dumo P. Sliding-scale insulin: an antiquated approach to glycemic control in  
65 536 hospitalized patients. *Am J Health Syst Pharm* 2004;61(15):1611-4. [published Online First:  
66 537 2004/09/18]  
67 538  
68 539 51. Brady VJ, Grimes D, Armstrong T, et al. Management of steroid-induced hyperglycemia in  
69 540 hospitalized patients with cancer: a review. *Oncology nursing forum* 2014;41(6):E355-65.  
70 541



1  
2  
3  
4  
5  
6  
7  
8  
9  
10  
11  
12  
13  
14  
15  
16  
17  
18  
19  
20  
21  
22  
23  
24  
25  
26  
27  
28  
29  
30  
31  
32  
33  
34  
35  
36  
37  
38  
39  
40  
41  
42  
43  
44  
45  
46  
47  
48  
49  
50  
51  
52  
53  
54  
55  
56  
57  
58  
59  
60

525 52. Draznin B, Gilden J, Golden SH, et al. Pathways to quality inpatient management of hyperglycemia  
526 and diabetes: a call to action. *Diabetes Care* 2013;36(7):1807-14. doi: 10.2337/dc12-2508  
527 [published Online First: 2013/06/27]

For peer review only

**Table 1:** Overview of included studies characteristics (alphabetic order)

| First author (year)                                                                                                   | Study population                                                                                                                                       | Prednisolone equiv. Dose (range or SD) mg; duration | Participants n (control/exp.); Age average (range or SD)                                              | Intervention in control group                                                                                                                                                                                                                 | Intervention in experimental group                                                                                                                                                                                                                                                                 |
|-----------------------------------------------------------------------------------------------------------------------|--------------------------------------------------------------------------------------------------------------------------------------------------------|-----------------------------------------------------|-------------------------------------------------------------------------------------------------------|-----------------------------------------------------------------------------------------------------------------------------------------------------------------------------------------------------------------------------------------------|----------------------------------------------------------------------------------------------------------------------------------------------------------------------------------------------------------------------------------------------------------------------------------------------------|
| <b>Randomized control trials</b> (all open-label and parallel-groups, except Gerards <sup>37</sup> cross-over design) |                                                                                                                                                        |                                                     |                                                                                                       |                                                                                                                                                                                                                                               |                                                                                                                                                                                                                                                                                                    |
| Gerards (2016) <sup>37</sup>                                                                                          | In- or outpatients with or without Type 2 DM and hyperglycemia under cyclic glucocorticoid-containing chemotherapy                                     | 50.4 (36.6-55.3)<br>3-4 days per cycle.             | 26 (13/13)<br>• 24 Type 2 DM (13 prior insulin)<br>• 22/26 outpatients<br>67 years (58-71)            | Additional SSI regimen to routine DM medication during prednisone containing cycles<br>• 4 times daily short-acting insulin according to BGL                                                                                                  | Additional IMI regimen during cycles to routine DM medication<br>• IMI single morning dose 0.01 IU/mg per kg prednisolone equivalent, max. 0.5 IU per kg; reduced to 40% in > 70 years or GFR < 60mL/min; daily increases 10% according to BGL                                                     |
| Grommesh (2016) <sup>34</sup>                                                                                         | Inpatients with or without Type 2 DM and hyperglycemia within 24h of glucocorticoids for any indication                                                | 57.2 (±31.5)<br>≤5 days                             | 61 (31/30)<br>• 30 Type 2 DM (prior insulin n/a)<br>64.8 years (±16.1)                                | BBI regimen 1:1 basal and bolus<br>• Basal: insulin glargine<br>• Bolus: prandial insulin lispro<br>• additional correctional insulin aspart<br>• Algorithm for initial dosing based on DM diagnosis, HbA1c and previous treatment (see ref.) | Additional NPH insulin to BBI regimen<br>• NPH along with glucocorticoid (three times if multiple dosing)<br>• Algorithm for NPH doses based on glucocorticoid dose and DM diagnosis                                                                                                               |
| Lakhani (2018) <sup>33</sup>                                                                                          | Inpatients with or without DM (Type 1 or 2) under glucocorticoids for any indication with postprandial hyperglycemia                                   | 20.75 (±12.7)<br>Duration n/a                       | 67 (34/33)<br>• DM (Type and prior insulin n/a) in 14 control / 21 experimental<br>54.2 years (±11.9) | BBI regimen 1:1 basal and bolus, 0.3-0.5 U/kg/d according to HbA1c<br>• Basal: insulin glargine at bedtime<br>• Bolus: prandial insulin lispro<br>• additional correctional insulin lispro                                                    | Additional correctional insulin which matches glycemic profile of the glucocorticoid administered according protocol (see ref) given along with glucocorticoid:<br>• regular insulin with hydrocortisone<br>• NPH with prednisolone or methylprednisolone<br>• Insulin glargine with dexamethasone |
| Radhakutty (2017) <sup>35</sup>                                                                                       | Inpatients with or without Type 2 DM and hyperglycemia under glucocorticoids for COPD, pneumonia, interstitial lung disease or gout.                   | 33 (±9.6)<br>>1 day                                 | 48 (23/25)<br>• 34 Type 2 DM (10 prior insulin)<br>72.1 years (±11.5)                                 | BBI regimen 1:1 basal and bolus, 0.5 U/kg/d<br>• Basal: insulin glargine<br>• Bolus: prandial insulin aspart in three equal doses<br>• additional correctional insulin if needed                                                              | BBI regimen 1:1 basal and bolus<br>• Basal: NPH insulin, morning dose<br>• Bolus: prandial insulin aspart, 20% before breakfast, 40% before lunch and 40% before dinner<br>• additional correctional insulin if needed                                                                             |
| Ruiz de Adana (2016) <sup>36</sup>                                                                                    | Inpatients with Type 2 DM on pneumology under glucocorticoids treatment for respiratory disease.                                                       | appx. 100mg day 1<br>appx. 33mg day 6               | 53 (27/26)<br>• 23 prior insulin<br>68.6 years (±7.3) years                                           | BBI regimen 1:1 basal and bolus, 0.3-0.5 U/kg/d or regular insulin dose multiplied by 1.5<br>• Basal: insulin glargine at 9:00 am<br>• Bolus: prandial insulin glulisine in three equal doses<br>• additional correctional insulin if needed  | BBI regimen 1:1 basal and bolus, 0.3-0.5 U/kg/d or regular insulin dose multiplied by 1.5<br>• Basal: NPH insulin in three equal prandial doses<br>• Bolus: prandial insulin glulisine in three equal doses<br>• additional correctional insulin if needed                                         |
| <b>Observational studies</b> (all retrospective cohort studies)                                                       |                                                                                                                                                        |                                                     |                                                                                                       |                                                                                                                                                                                                                                               |                                                                                                                                                                                                                                                                                                    |
| Burt (2015) <sup>38</sup>                                                                                             | Inpatients with Type 2 DM with or without prednisolone for inflammatory disease                                                                        | 33.2±9.0 day1<br>21.1±7.2 day 5                     | 66 (42/24)<br>• 24 prior insulin<br>75.7 years (±12.9)                                                | BBI regimen 1:1 basal and bolus, 0.3-0.4 U/kg/d<br>• Basal: insulin glargine<br>• Bolus: insulin aspart or lispro or glulisin, divided into three meal time bolus<br>• additional correctional insulin if needed                              | BBI regimen as control and additional prednisolone single morning dose >3 days                                                                                                                                                                                                                     |
| Dhital (2012) <sup>39</sup>                                                                                           | Inpatients with or without Type 2 DM treated with prednisolone at day before discharge; comparison of NPH insulin vs. insulin glargine in BBI regimen. | 31±24.4                                             | 120 (60/60)<br>• 61 Type 2 DM (prior insulin n/a)<br>58 years (±14)                                   | BBI regimen 1:1 basal and bolus<br>• Basal: insulin glargine<br>• Bolus: insulin aspart<br>• additional correctional insulin if needed                                                                                                        | BBI regimen 1:1 basal and bolus insulin<br>• Basal: NPH insulin<br>• Bolus: regular insulin<br>• additional correctional insulin if needed                                                                                                                                                         |

|                                  |                                                                                   |          |                                                       |                                                                                                                                                                                                                           |                                                          |
|----------------------------------|-----------------------------------------------------------------------------------|----------|-------------------------------------------------------|---------------------------------------------------------------------------------------------------------------------------------------------------------------------------------------------------------------------------|----------------------------------------------------------|
| Gosmanov (2013)<br><sup>40</sup> | Inpatients with Type 2 DM treated with dexamethasone for hematologic malignancies | 57.2±9.9 | 40 (12/28)<br>• 15 prior insulin<br>56.1 years (±7.8) | BBI regimen 1:1 basal and bolus, 0.33 U/kg/d<br>• Basal: insulin detemir twice daily<br>• Bolus: insulin aspart<br>• additional correctional insulin if needed<br>• daily insulin dose correction if out of target 20-30% | SSI regimen with regular insulin (for protocol see ref.) |
|----------------------------------|-----------------------------------------------------------------------------------|----------|-------------------------------------------------------|---------------------------------------------------------------------------------------------------------------------------------------------------------------------------------------------------------------------------|----------------------------------------------------------|

BBI: basal-bolus insulin; BGL: blood glucose level; COPD: chronic obstructive pulmonary disease; DM: diabetes mellitus; IMI: intermediate-acting insulin; NPH: Neutral Protamine Hagedorn, isophane insulin; SSI: sliding-scale insulin

For peer review only

1  
2  
3  
4  
5  
6  
7  
8  
9  
10  
11  
12  
13  
14  
15  
16  
17  
18  
19  
20  
21  
22  
23  
24  
25  
26  
27  
28  
29  
30  
31  
32  
33  
34  
35  
36  
37  
38  
39  
40  
41  
42  
43  
44  
45  
46

**Table 2:** Outcomes of included original articles (alphabetic order)

| First author <sup>ref</sup>      | Target glucose (mmol/l) | Glycemic control                       |                                        |               |                                                        |                                                        |              | Mean total daily insulin dose (IU/kg/day or U/d) |                          |              | Hypoglycemia <3.9mmol/l      | Hyperglycemia >16.7mmol/l | Other                                            |
|----------------------------------|-------------------------|----------------------------------------|----------------------------------------|---------------|--------------------------------------------------------|--------------------------------------------------------|--------------|--------------------------------------------------|--------------------------|--------------|------------------------------|---------------------------|--------------------------------------------------|
|                                  |                         | Time in target glucose range (%)       |                                        |               | Mean daily BGL (mmol/l)                                |                                                        |              | Control                                          | Exper.                   | p value      |                              |                           |                                                  |
|                                  |                         | Control                                | Exper.                                 | p value       | Control                                                | Exper.                                                 | p value      |                                                  |                          |              |                              |                           |                                                  |
| <b>Randomized control trials</b> |                         |                                        |                                        |               |                                                        |                                                        |              |                                                  |                          |              |                              |                           |                                                  |
| Gerards <sup>37</sup>            | 3.9-10                  | 20.9 <sup>1</sup>                      | 34.3 <sup>1</sup>                      | < 0.001       | 13.5 ± 2.8 <sup>1</sup>                                | 12.4± 2.9 <sup>1</sup>                                 | <0.05        | 26.0 (13.5-63.0)                                 | 40.3 (28.7-61.0)         | 0.01         | mild p=0.21<br>no severe     | n/a                       | Persons prefer SSI/IMI 29/71%                    |
| Grommesh <sup>34</sup>           | 3.9-10                  | 54.6 <sup>2</sup>                      | 62.0 <sup>2</sup>                      | 0.24          | 9.9 ± 1.7 <sup>2</sup>                                 | 9.4±2.0 <sup>2</sup>                                   | 0.17         | 34.8                                             | 35.8                     | 0.13         | 0.1% both groups             | 2.9%, p=0.89              | MAGE p=0.0001                                    |
| Lakhani <sup>33</sup>            | 5.6-10                  | 15.0 <sup>3</sup><br>16.7 <sup>4</sup> | 33.3 <sup>3</sup><br>29.3 <sup>4</sup> | 0.002<br>0.09 | 12.3 ± 2.8 <sup>2</sup>                                | 9.5±1.9 <sup>2</sup>                                   | 0.0001       | n/a                                              | n/a                      | n/a          | mild p=0.3<br>no severe      | 20.7 events,<br>p<0.001   | MAGE p=0.0001                                    |
| Radhakutty <sup>35</sup>         | 4-10                    | 50 <sup>2,5</sup>                      | 58 <sup>2,5</sup>                      | 0.28          | 11.8 <sup>2,5</sup>                                    | 10.5 <sup>2,5</sup>                                    | 0.57         | 0.67±0.08                                        | 0.61±0.04                | 0.57         | mild p=0.92<br>no severe     | n/a                       | MAGE p=0.2                                       |
| Ruiz de Adana <sup>36</sup>      | 4.5-10                  | 42 <sup>1</sup>                        | 38 <sup>1</sup>                        | 0.61          | 10.88 ± 2.99 <sup>1</sup><br>11.43 ± 3.44 <sup>6</sup> | 11.10 ± 3.55 <sup>1</sup><br>11.88 ± 2.94 <sup>6</sup> | 0.62<br>0.97 | 56.9±40.6                                        | 55.4±27.5                | 0.43         | mild p=0.35<br>severe p=0.13 | no events                 | MAGE p=0.377                                     |
| <b>Observational studies</b>     |                         |                                        |                                        |               |                                                        |                                                        |              |                                                  |                          |              |                              |                           |                                                  |
| Burt <sup>38</sup>               | 4-10                    | n/a                                    | n/a                                    | n/a           | 10 ± 0.1 <sup>2</sup>                                  | 12.2 ± 0.3 <sup>2</sup>                                | <0.001       | 0.60-0.65                                        | 0.67-0.70                | 0.001        | all p=0.28<br>no severe      | n/a                       | BGL at 6 and 12 am similar, at 5 and 9 pm higher |
| Dhital <sup>39</sup>             | n/a                     | n/a                                    | n/a                                    | n/a           | 9.2±2.9 <sup>7</sup>                                   | 9.3±2.6 <sup>7</sup>                                   | 0.79         | 0.34 ± 0.2 basal<br>0.36 ± 0.2 bolus             | 0.27 ± 0.2<br>0.26 ± 0.2 | 0.04<br>0.03 | all p=0.77<br>no severe      | n/a                       |                                                  |
| Gosmanov <sup>40</sup>           | 5.6-10                  | n/a                                    | n/a                                    | n/a           | 12.2±2.8 <sup>7</sup>                                  | 16.7±3.2 <sup>7</sup>                                  | <0.001       | 122±39<br>0.63±0.25                              | 49±29<br>0.46±0.16       | <0.001       | no events                    | 3 events exper. group     |                                                  |

BGL: blood glucose level; IMI: intermediate insulin; MAGE: mean amplitude of glycemic excursions; n/a: not applicable; SSI: sliding scale insulin

<sup>1</sup> CGM: continuous glucose monitoring

<sup>2</sup> capillary blood glucose monitoring four times a day (three times before meals and at bedtime)

<sup>3</sup> pre-meal blood glucose in target range; pre-meal target range defined as BGL 5.6-7.8 mmol/l;

<sup>4</sup> bedtime blood glucose in target range; bedtime target range defined as BGL 7.8-9.99 mmol/l;

<sup>5</sup> approximation, because article indicates 'time outside target glucose range'

<sup>6</sup> capillary blood glucose monitoring pre-meal and 2h post-meal

<sup>7</sup> all available BGL

**FIGURE LEGEND**

**Fig. 1:** Flow diagram of study selection

For peer review only

Figure 1:

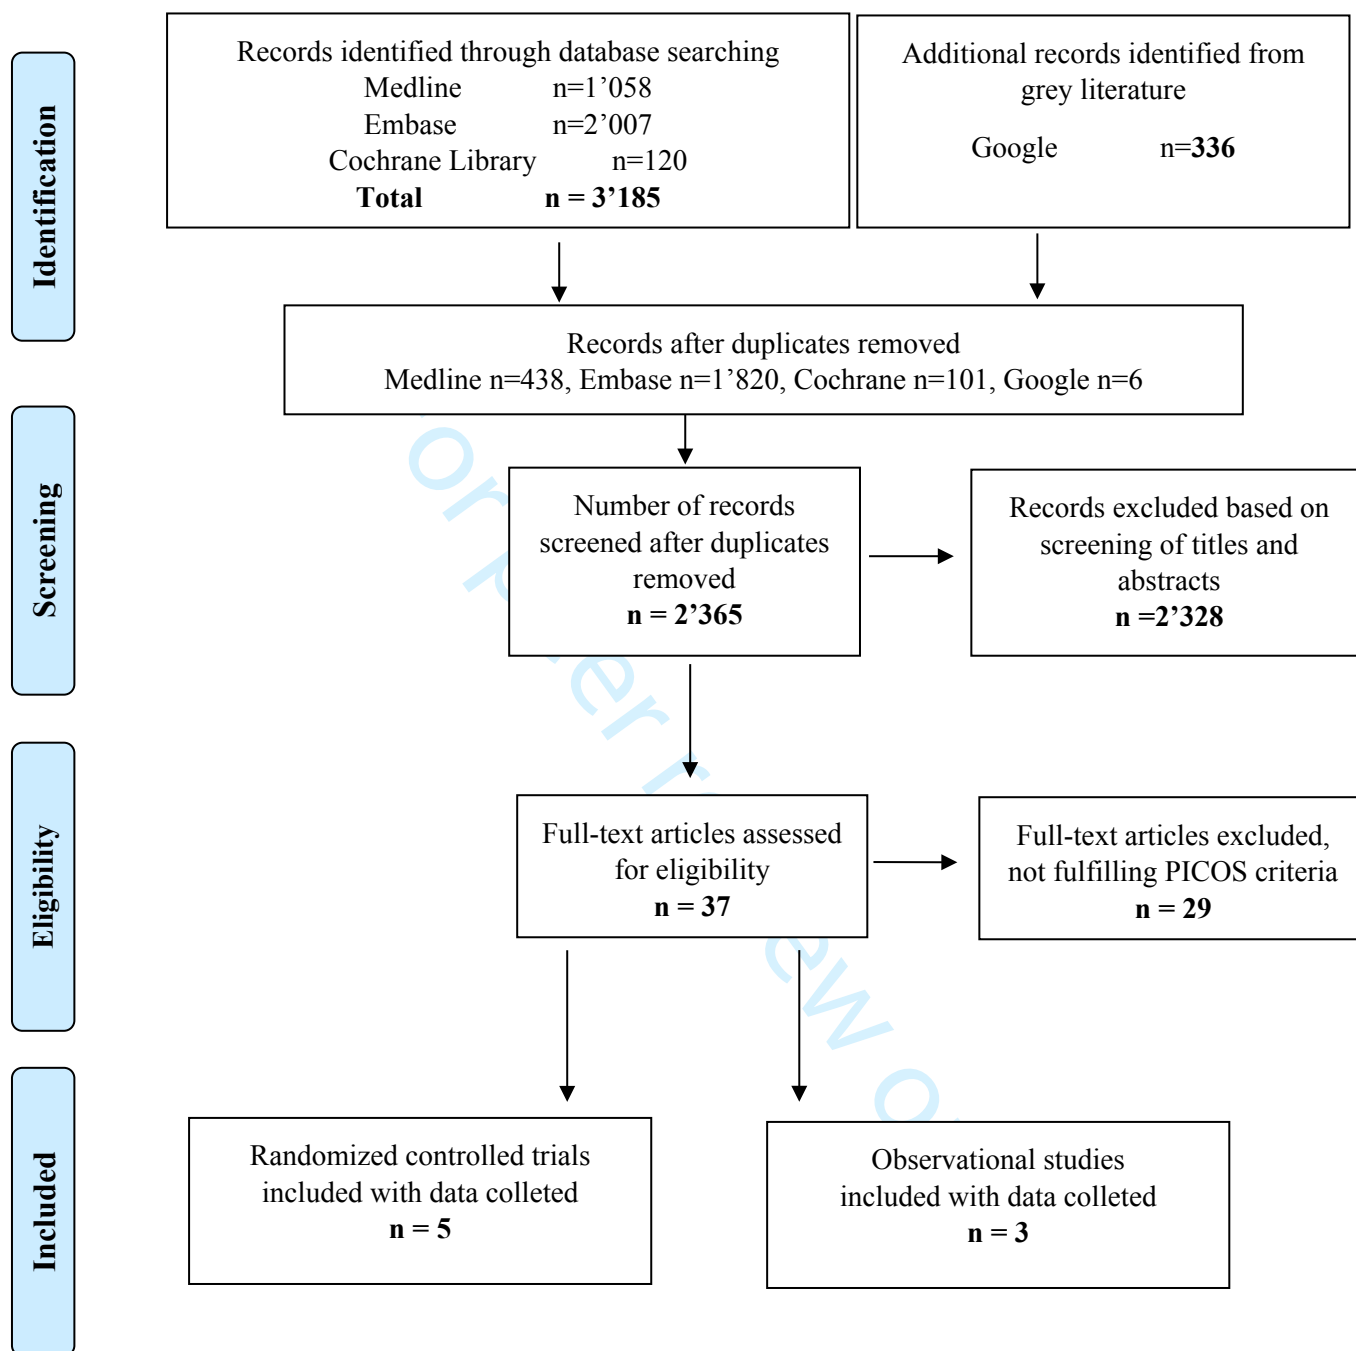

Supplementary Table 1: Search strategies

a) OVID search strategy

|    |                                                                                                                                                                                                                                                                                                                                                                                                                                                                                                                                                                                                                                                                                                                                                                                                                                                                               |
|----|-------------------------------------------------------------------------------------------------------------------------------------------------------------------------------------------------------------------------------------------------------------------------------------------------------------------------------------------------------------------------------------------------------------------------------------------------------------------------------------------------------------------------------------------------------------------------------------------------------------------------------------------------------------------------------------------------------------------------------------------------------------------------------------------------------------------------------------------------------------------------------|
| 1  | exp Diabetes Mellitus/                                                                                                                                                                                                                                                                                                                                                                                                                                                                                                                                                                                                                                                                                                                                                                                                                                                        |
| 2  | diabet*.tw.                                                                                                                                                                                                                                                                                                                                                                                                                                                                                                                                                                                                                                                                                                                                                                                                                                                                   |
| 3  | 1 or 2                                                                                                                                                                                                                                                                                                                                                                                                                                                                                                                                                                                                                                                                                                                                                                                                                                                                        |
| 4  | hyperglyc*.ab,ti.                                                                                                                                                                                                                                                                                                                                                                                                                                                                                                                                                                                                                                                                                                                                                                                                                                                             |
| 5  | ((serum* or level* or blood*) adj5 (glucose* or sugar* or level*)).ab,ti.                                                                                                                                                                                                                                                                                                                                                                                                                                                                                                                                                                                                                                                                                                                                                                                                     |
| 6  | exp Hyperglycemia/                                                                                                                                                                                                                                                                                                                                                                                                                                                                                                                                                                                                                                                                                                                                                                                                                                                            |
| 7  | exp Blood Glucose/                                                                                                                                                                                                                                                                                                                                                                                                                                                                                                                                                                                                                                                                                                                                                                                                                                                            |
| 8  | 4 or 5 or 6 or 7                                                                                                                                                                                                                                                                                                                                                                                                                                                                                                                                                                                                                                                                                                                                                                                                                                                              |
| 9  | 3 and 8                                                                                                                                                                                                                                                                                                                                                                                                                                                                                                                                                                                                                                                                                                                                                                                                                                                                       |
| 10 | exp Adrenal Cortex Hormones/ad, ae, dt, to [Administration & Dosage, Adverse Effects, Drug Therapy, Toxicity]                                                                                                                                                                                                                                                                                                                                                                                                                                                                                                                                                                                                                                                                                                                                                                 |
| 11 | exp Steroids/ad, ae, dt, th, to [Administration & Dosage, Adverse Effects, Drug Therapy, Therapy, Toxicity]                                                                                                                                                                                                                                                                                                                                                                                                                                                                                                                                                                                                                                                                                                                                                                   |
| 12 | ((corti* or predni* or glucocorticoid* or steroid* or 'adrenal cortex hormone' or beclomethasone or betamethasone or budesonide or clobetasol or desoximetasone or dexamethasone or diflucortolone or flumethasone or 'fluocinolone acetonide' or fluocinonide or fluocortolone or fluorometholone or fluprednisolone or flurandrenolone or 'melengestrol acetate' or methylprednisolone or paramethasone or prednisolone or prednisone or triamcinolone or aldosterone or corticosterone or '18 hydroxycorticosterone' or cortisone or cortodoxone or hydrocortisone or tetrahydrocortisol or tetrahydrocortisone or '18 hydroxydesoxycorticosterone' or 'desoxycorticosterone acetate' or '17 alphahydroxypregnenolone' or hydroxysteroid* or finasteride) adj10 (effect* or influenc* or impact* or therap* or medic* or induc* or administ* or dosage or treatm*)).ab,ti. |

|    |                                                                                                                                                                                                                                                                                                                                                                                                                                                                                                                                                                 |
|----|-----------------------------------------------------------------------------------------------------------------------------------------------------------------------------------------------------------------------------------------------------------------------------------------------------------------------------------------------------------------------------------------------------------------------------------------------------------------------------------------------------------------------------------------------------------------|
| 13 | 10 or 11 or 12                                                                                                                                                                                                                                                                                                                                                                                                                                                                                                                                                  |
| 14 | exp Hypoglycemic Agents/                                                                                                                                                                                                                                                                                                                                                                                                                                                                                                                                        |
| 15 | (intensive insulin or glucose or basal bolus or basal-bolus or multiple-dose insulin or basal insulin or prandial insulin or continuous subcutaneous insulin infusion or acetoexamide or biphasic insulins or buformin or butoxamine or carbutamide or chlorpropamide or gliclazide or glipizide or glyburide or insulin* or insulin aspart or insulin lispro or isophane insulin or lente insulin or long-acting insulin or regular pork insulin or short-acting insulin or ultralente insulin or metformin or phenformin or tolazamide or tolbutamide).ab,ti. |
| 16 | 14 or 15                                                                                                                                                                                                                                                                                                                                                                                                                                                                                                                                                        |
| 17 | exp Guideline/                                                                                                                                                                                                                                                                                                                                                                                                                                                                                                                                                  |
| 18 | ((glyc* or hyperglyc* or diab* or gluco* or clinic*) adj10 (guide* or manage* or contro* or treatm* or therap* or protoc* or 'expert opinion' or target* or adjust* or admin* or chang* or regim* or requir* or monitor*)).ab,ti.                                                                                                                                                                                                                                                                                                                               |
| 19 | ((treat* or diseas* or therap* or proced* or proto* or clinic*) adj10 (guid* or sugg* or advice* or recommend* or manage* or rule* or outline* or princip* or 'evidence based' or contro* or 'expert opinion' or regim*)).ab,ti.                                                                                                                                                                                                                                                                                                                                |
| 20 | 17 or 18 or 19                                                                                                                                                                                                                                                                                                                                                                                                                                                                                                                                                  |
| 21 | 9 and 13 and 16 and 20                                                                                                                                                                                                                                                                                                                                                                                                                                                                                                                                          |
| 22 | limit 21 to animals                                                                                                                                                                                                                                                                                                                                                                                                                                                                                                                                             |
| 23 | limit 22 to humans                                                                                                                                                                                                                                                                                                                                                                                                                                                                                                                                              |
| 24 | 22 not 23                                                                                                                                                                                                                                                                                                                                                                                                                                                                                                                                                       |
| 25 | 21 not 24                                                                                                                                                                                                                                                                                                                                                                                                                                                                                                                                                       |
| 26 | limit 25 to yr="2001 -Current"                                                                                                                                                                                                                                                                                                                                                                                                                                                                                                                                  |



## b) EMBASE and Cochrane library search strategy

|    |                                                                                                                                                                                                                                                                                                                                                                                                                                                                                                                                                                                                                                                                                                                                                                                                                                                                                |
|----|--------------------------------------------------------------------------------------------------------------------------------------------------------------------------------------------------------------------------------------------------------------------------------------------------------------------------------------------------------------------------------------------------------------------------------------------------------------------------------------------------------------------------------------------------------------------------------------------------------------------------------------------------------------------------------------------------------------------------------------------------------------------------------------------------------------------------------------------------------------------------------|
| 1  | 'diabetes mellitus'/exp                                                                                                                                                                                                                                                                                                                                                                                                                                                                                                                                                                                                                                                                                                                                                                                                                                                        |
| 2  | diabet*                                                                                                                                                                                                                                                                                                                                                                                                                                                                                                                                                                                                                                                                                                                                                                                                                                                                        |
| 3  | #1 OR #2                                                                                                                                                                                                                                                                                                                                                                                                                                                                                                                                                                                                                                                                                                                                                                                                                                                                       |
| 4  | hyperglyc*:ab,ti                                                                                                                                                                                                                                                                                                                                                                                                                                                                                                                                                                                                                                                                                                                                                                                                                                                               |
| 5  | ((serum* OR blood* OR level*) NEAR/5 (glucose* OR sugar* OR level*)):ab,ti                                                                                                                                                                                                                                                                                                                                                                                                                                                                                                                                                                                                                                                                                                                                                                                                     |
| 6  | 'hyperglycemia'/exp                                                                                                                                                                                                                                                                                                                                                                                                                                                                                                                                                                                                                                                                                                                                                                                                                                                            |
| 7  | 'blood glucose level'/exp                                                                                                                                                                                                                                                                                                                                                                                                                                                                                                                                                                                                                                                                                                                                                                                                                                                      |
| 8  | #4 OR #5 OR #6 OR #7                                                                                                                                                                                                                                                                                                                                                                                                                                                                                                                                                                                                                                                                                                                                                                                                                                                           |
| 9  | #3 AND #8                                                                                                                                                                                                                                                                                                                                                                                                                                                                                                                                                                                                                                                                                                                                                                                                                                                                      |
| 10 | 'corticosteroid'/exp/dd_do,dd_dt,dd_ae,dd_to,dd_ad,dd_it                                                                                                                                                                                                                                                                                                                                                                                                                                                                                                                                                                                                                                                                                                                                                                                                                       |
| 11 | ((corti* OR predni* OR glucocorticoid* OR steroid* OR 'adrenal cortex hormone' OR beclomethasone OR betamethasone OR budesonide OR clobetasol OR desoximetasone OR dexamethasone OR diflucortolone OR flumethasone OR 'fluocinolone acetonide' OR fluocinonide OR fluocortolone OR fluorometholone OR fluprednisolone OR flurandrenolone OR 'melengestrol acetate' OR methylprednisolone OR paramethasone OR prednisolone OR prednisone OR triamcinolone OR aldosterone OR corticosterone OR '18 hydroxycorticosterone' OR cortisone OR cortodoxone OR hydrocortisone OR tetrahydrocortisol OR tetrahydrocortisone OR '18 hydroxydesoxycorticosterone' OR 'desoxycorticosterone acetate' OR '17 alphahydroxypregnenolone' OR hydroxysteroid* OR finasteride) NEAR/10 (effect* OR influenc* OR impact* OR therap* OR medic* OR induc* OR administ* OR dosage OR treatm*)):ab,ti |
| 12 | #10 OR #11                                                                                                                                                                                                                                                                                                                                                                                                                                                                                                                                                                                                                                                                                                                                                                                                                                                                     |

|    |                                                                                                                                                                                                                                                                                                                                                                                                                                                                                                                                                                                                                                                                                                                                                                          |
|----|--------------------------------------------------------------------------------------------------------------------------------------------------------------------------------------------------------------------------------------------------------------------------------------------------------------------------------------------------------------------------------------------------------------------------------------------------------------------------------------------------------------------------------------------------------------------------------------------------------------------------------------------------------------------------------------------------------------------------------------------------------------------------|
| 13 | 'antidiabetic agent'/exp                                                                                                                                                                                                                                                                                                                                                                                                                                                                                                                                                                                                                                                                                                                                                 |
| 14 | 'intensive insulin':ab,ti OR glucose:ab,ti OR 'basal bolus':ab,ti OR 'basal-bolus':ab,ti OR 'multiple-dose insulin':ab,ti OR 'basal insulin':ab,ti OR 'prandial insulin':ab,ti OR 'continuous subcutaneous insulin infusion':ab,ti OR acetoheamide:ab,ti OR 'biphasic insulins':ab,ti OR buformin:ab,ti OR butoxamine:ab,ti OR carbutamide:ab,ti OR chlorpropamide:ab,ti OR gliclazide:ab,ti OR glipizide:ab,ti OR glyburide:ab,ti OR insul*:ab,ti OR 'insulin aspart':ab,ti OR 'insulin lispro':ab,ti OR 'isophane insulin':ab,ti OR 'lente insulin':ab,ti OR 'long-acting insulin':ab,ti OR 'regular pork insulin':ab,ti OR 'short-acting insulin':ab,ti OR 'ultralente insulin':ab,ti OR metformin:ab,ti OR phenformin:ab,ti OR tolazamide:ab,ti OR tolbutamide:ab,ti |
| 15 | #13 OR #14                                                                                                                                                                                                                                                                                                                                                                                                                                                                                                                                                                                                                                                                                                                                                               |
| 16 | 'practice guideline'/exp                                                                                                                                                                                                                                                                                                                                                                                                                                                                                                                                                                                                                                                                                                                                                 |
| 17 | 'diabetic control'/exp                                                                                                                                                                                                                                                                                                                                                                                                                                                                                                                                                                                                                                                                                                                                                   |
| 18 | ((treat* OR diseas* OR therap* OR proced* OR proto* OR clinic*) NEAR/10 (guid* OR sugg* OR advice* OR recommend* OR manage* OR rule* OR outline* OR princip* OR 'evidence based' OR contro* OR 'expert opinion' OR regim*)):ab,ti                                                                                                                                                                                                                                                                                                                                                                                                                                                                                                                                        |
| 19 | ((glyc* OR hyperglyc* OR diab* OR gluco* OR clinic*) NEAR/10 (guide* OR manage* OR contro* OR treatm* OR therap* OR protoc* OR 'expert opinion' OR target* OR adjust* OR admin* OR chang* OR regim* OR requir* OR monitor*)):ab,ti                                                                                                                                                                                                                                                                                                                                                                                                                                                                                                                                       |
| 20 | #16 OR #17 OR #18 OR #19                                                                                                                                                                                                                                                                                                                                                                                                                                                                                                                                                                                                                                                                                                                                                 |
| 21 | #9 AND #12 AND #15 AND #20                                                                                                                                                                                                                                                                                                                                                                                                                                                                                                                                                                                                                                                                                                                                               |
| 22 | #9 AND #12 AND #15 AND #20 AND [animals]/lim                                                                                                                                                                                                                                                                                                                                                                                                                                                                                                                                                                                                                                                                                                                             |
| 23 | #9 AND #12 AND #15 AND #20 AND [humans]/lim AND [animals]/lim                                                                                                                                                                                                                                                                                                                                                                                                                                                                                                                                                                                                                                                                                                            |
| 24 | #22 NOT #23                                                                                                                                                                                                                                                                                                                                                                                                                                                                                                                                                                                                                                                                                                                                                              |
| 25 | #21 NOT #24                                                                                                                                                                                                                                                                                                                                                                                                                                                                                                                                                                                                                                                                                                                                                              |
| 26 | #25 NOT [conference abstract]/lim                                                                                                                                                                                                                                                                                                                                                                                                                                                                                                                                                                                                                                                                                                                                        |

1  
2  
3  
4 27 #26 AND (2001:py OR 2002:py OR 2003:py OR 2004:py OR 2005:py OR 2006:py OR 2007:py OR 2008:py OR 2009:py OR 2010:py OR 2011:py OR  
5 2012:py OR 2013:py OR 2014:py OR 2015:py OR 2016:py)  
6  
7

8 c) Google advanced search  
9

10 "management" or "steroid therapy" or "guideline" and diabet\* or hypergly\* or corti\* or predni\* or glucocorticoid\* or steroid\*or glycemic  
11 control  
12

13  
14 Restriction to PDF Files.  
15  
16  
17  
18  
19  
20  
21  
22  
23  
24  
25  
26  
27  
28  
29  
30  
31  
32  
33  
34  
35  
36  
37  
38  
39  
40  
41  
42  
43  
44  
45  
46

**Supplementary Table 2: Risk of bias**

a) Risk of bias in five RCTs for seven domains and four different outcomes: mean BGL, time in target glucose range, insulin dose, hypoglycemia

| Randomized control trials (all open-label and parallel-group {except Gerards <sup>9</sup> cross over design}) |                                                                                                                                                   |                                                                                                                                              |                                                                                                                                               |                                                                                                                                                   |                                                                                                                                                   |                                                                                                                                                   |                                                                                                                                               |
|---------------------------------------------------------------------------------------------------------------|---------------------------------------------------------------------------------------------------------------------------------------------------|----------------------------------------------------------------------------------------------------------------------------------------------|-----------------------------------------------------------------------------------------------------------------------------------------------|---------------------------------------------------------------------------------------------------------------------------------------------------|---------------------------------------------------------------------------------------------------------------------------------------------------|---------------------------------------------------------------------------------------------------------------------------------------------------|-----------------------------------------------------------------------------------------------------------------------------------------------|
| First author (year)                                                                                           | Risk of bias                                                                                                                                      |                                                                                                                                              |                                                                                                                                               |                                                                                                                                                   |                                                                                                                                                   |                                                                                                                                                   |                                                                                                                                               |
|                                                                                                               | Sequence generation                                                                                                                               | Allocation concealment                                                                                                                       | Selective reporting                                                                                                                           | Other sources of bias                                                                                                                             | Blinding (participants and personnel)                                                                                                             | Blinding (outcome assessment)                                                                                                                     | Incomplete outcome data                                                                                                                       |
| Gerards (2016) <sup>37</sup>                                                                                  | -Mean BGL: <b>low</b><br>-Time in target range: <b>low</b><br>-Insulin dose: <b>low</b><br>-Hypoglycemia: <b>low</b><br>-Overall: <b>low</b>      | -Mean BGL: <b>low</b><br>-Time in target range: <b>low</b><br>-Insulin dose: <b>low</b><br>-Hypoglycemia: <b>low</b><br>-Overall: <b>low</b> | -Mean BGL: <b>low</b><br>-Time in target range: <b>low</b><br>-Insulin dose: <b>low</b><br>-Hypoglycemia: <b>low</b><br>-Overall: <b>low</b>  | -Mean BGL: <b>low</b><br>-Time in target range: <b>low</b><br>-Insulin dose: <b>low</b><br>-Hypoglycemia: <b>low</b><br>-Overall: <b>low</b>      | -Mean BGL: <b>high</b><br>-Time in target range: <b>high</b><br>-Insulin dose: <b>high</b><br>-Hypoglycemia: <b>high</b><br>-Overall: <b>high</b> | -Mean BGL: <b>low</b><br>-Time in target range: <b>low</b><br>-Insulin dose: <b>high</b><br>-Hypoglycemia: <b>high</b><br>-Overall: <b>n/a</b>    | -Mean BGL: <b>low</b><br>-Time in target range: <b>low</b><br>-Insulin dose: <b>low</b><br>-Hypoglycemia: <b>low</b><br>-Overall: <b>low</b>  |
| Grommesh (2016) <sup>34</sup>                                                                                 | -Mean BGL: <b>nk</b><br>-Time in target range: <b>nk</b><br>-Insulin dose: <b>nk</b><br>-Hypoglycemia: <b>nk</b><br>-Overall: <b>nk</b>           | -Mean BGL: <b>nk</b><br>-Time in target range: <b>nk</b><br>-Insulin dose: <b>nk</b><br>-Hypoglycemia: <b>nk</b><br>-Overall: <b>nk</b>      | -Mean BGL: <b>low</b><br>-Time in target range: <b>low</b><br>-Insulin dose: <b>low</b><br>-Hypoglycemia: <b>low</b><br>-Overall: <b>low</b>  | -Mean BGL: <b>high</b><br>-Time in target range: <b>high</b><br>-Insulin dose: <b>high</b><br>-Hypoglycemia: <b>high</b><br>-Overall: <b>high</b> | -Mean BGL: <b>high</b><br>-Time in target range: <b>high</b><br>-Insulin dose: <b>high</b><br>-Hypoglycemia: <b>high</b><br>-Overall: <b>high</b> | -Mean BGL: <b>high</b><br>-Time in target range: <b>high</b><br>-Insulin dose: <b>high</b><br>-Hypoglycemia: <b>high</b><br>-Overall: <b>high</b> | -Mean BGL: <b>low</b><br>-Time in target range: <b>low</b><br>-Insulin dose: <b>low</b><br>-Hypoglycemia: <b>low</b><br>-Overall: <b>low</b>  |
| Lakhani (2018) <sup>33</sup>                                                                                  | -Mean BGL: <b>low</b><br>-Time in target range: <b>low</b><br>-Insulin dose: <b>low</b><br>-Hypoglycemia: <b>low</b><br>-Overall: <b>low</b>      | -Mean BGL: <b>nk</b><br>-Time in target range: <b>nk</b><br>-Insulin dose: <b>nk</b><br>-Hypoglycemia: <b>nk</b><br>-Overall: <b>nk</b>      | -Mean BGL: <b>low</b><br>-Time in target range: <b>low</b><br>-Insulin dose: <b>high</b><br>-Hypoglycemia: <b>low</b><br>-Overall: <b>low</b> | -Mean BGL: <b>low</b><br>-Time in target range: <b>low</b><br>-Insulin dose: <b>low</b><br>-Hypoglycemia: <b>low</b><br>-Overall: <b>low</b>      | -Mean BGL: <b>high</b><br>-Time in target range: <b>high</b><br>-Insulin dose: <b>high</b><br>-Hypoglycemia: <b>high</b><br>-Overall: <b>high</b> | -Mean BGL: <b>high</b><br>-Time in target range: <b>high</b><br>-Insulin dose: <b>high</b><br>-Hypoglycemia: <b>high</b><br>-Overall: <b>high</b> | -Mean BGL: <b>low</b><br>-Time in target range: <b>low</b><br>-Insulin dose: <b>high</b><br>-Hypoglycemia: <b>low</b><br>-Overall: <b>low</b> |
| Radhakutty (2017) <sup>35</sup>                                                                               | -Mean BGL: <b>low</b><br>-Time in target range: <b>low</b><br>-Insulin dose: <b>low</b><br>-Hypoglycemia: <b>low</b><br>-Overall: <b>low</b>      | -Mean BGL: <b>low</b><br>-Time in target range: <b>low</b><br>-Insulin dose: <b>low</b><br>-Hypoglycemia: <b>low</b><br>-Overall: <b>low</b> | -Mean BGL: <b>low</b><br>-Time in target range: <b>low</b><br>-Insulin dose: <b>low</b><br>-Hypoglycemia: <b>low</b><br>-Overall: <b>low</b>  | -Mean BGL: <b>low</b><br>-Time in target range: <b>low</b><br>-Insulin dose: <b>low</b><br>-Hypoglycemia: <b>low</b><br>-Overall: <b>low</b>      | -Mean BGL: <b>high</b><br>-Time in target range: <b>high</b><br>-Insulin dose: <b>high</b><br>-Hypoglycemia: <b>high</b><br>-Overall: <b>high</b> | -Mean BGL: <b>high</b><br>-Time in target range: <b>high</b><br>-Insulin dose: <b>high</b><br>-Hypoglycemia: <b>high</b><br>-Overall: <b>high</b> | -Mean BGL: <b>low</b><br>-Time in target range: <b>low</b><br>-Insulin dose: <b>low</b><br>-Hypoglycemia: <b>low</b><br>-Overall: <b>low</b>  |
| Ruiz de Adana (2016) <sup>36</sup>                                                                            | -Mean BGL: <b>high</b><br>-Time in target range: <b>high</b><br>-Insulin dose: <b>high</b><br>-Hypoglycemia: <b>high</b><br>-Overall: <b>high</b> | -Mean BGL: <b>nk</b><br>-Time in target range: <b>nk</b><br>-Insulin dose: <b>nk</b><br>-Hypoglycemia: <b>nk</b><br>-Overall: <b>nk</b>      | -Mean BGL: <b>low</b><br>-Time in target range: <b>low</b><br>-Insulin dose: <b>low</b><br>-Hypoglycemia: <b>low</b><br>-Overall: <b>low</b>  | -Mean BGL: <b>low</b><br>-Time in target range: <b>low</b><br>-Insulin dose: <b>low</b><br>-Hypoglycemia: <b>low</b><br>-Overall: <b>low</b>      | -Mean BGL: <b>high</b><br>-Time in target range: <b>high</b><br>-Insulin dose: <b>high</b><br>-Hypoglycemia: <b>high</b><br>-Overall: <b>high</b> | -Mean BGL: <b>high</b><br>-Time in target range: <b>high</b><br>-Insulin dose: <b>high</b><br>-Hypoglycemia: <b>high</b><br>-Overall: <b>high</b> | -Mean BGL: <b>low</b><br>-Time in target range: <b>low</b><br>-Insulin dose: <b>low</b><br>-Hypoglycemia: <b>low</b><br>-Overall: <b>low</b>  |

nk: not known as either unclear or not reported; n/a: not applicable

b) Risk of bias in three included observational studies

| <b>Observational studies (all retrospective cohort studies)</b> |                                                                      |                                                        |                                                  |                             |
|-----------------------------------------------------------------|----------------------------------------------------------------------|--------------------------------------------------------|--------------------------------------------------|-----------------------------|
| <b>First author (year)</b>                                      | <b>Risk of bias</b>                                                  |                                                        |                                                  |                             |
|                                                                 | <b>Failure to develop and apply appropriate eligibility criteria</b> | <b>Flawed measurement of both exposure and outcome</b> | <b>Failure to adequately control confounding</b> | <b>Incomplete follow-up</b> |
| Burt (2015) <sup>38</sup>                                       | low                                                                  | low                                                    | low                                              | low                         |
| Dhital (2012) <sup>39</sup>                                     | low                                                                  | low                                                    | high                                             | low                         |
| Gosmanov (2013) <sup>40</sup>                                   | high                                                                 | low                                                    | high                                             | low                         |

For peer review only

1  
2  
3  
4  
5  
6  
7  
8  
9  
10  
11  
12  
13  
14  
15  
16  
17  
18  
19  
20  
21  
22  
23  
24  
25  
26  
27  
28  
29  
30  
31  
32  
33  
34  
35  
36  
37  
38  
39  
40  
41  
42  
43  
44  
45  
46

**Supplementary Table 3: Quality of evidence for mean BGL and time in target glucose range (high, moderate, low or very low)**

| First author                       | Limitations/ Risk of bias (serious/not serious) | Inconsistency (Yes/No/not relevant)                        | Indirectness (Yes/No/not relevant)                       | Imprecision (Yes/No/not relevant)                          | Publication bias (likely/unlikely)                                   | Quality of evidence after up-/downgrading      |
|------------------------------------|-------------------------------------------------|------------------------------------------------------------|----------------------------------------------------------|------------------------------------------------------------|----------------------------------------------------------------------|------------------------------------------------|
| <b>Randomized control trial</b>    |                                                 |                                                            |                                                          |                                                            |                                                                      |                                                |
| Gerards (2016) <sup>37</sup>       | <b>Not serious</b>                              | Mean BGL: <b>No</b><br>Time in target glucose: <b>No</b>   | Mean BGL: <b>No</b><br>Time in target glucose: <b>No</b> | Mean BGL: <b>Yes</b><br>Time in target glucose: <b>Yes</b> | Mean BGL: <b>unlikely</b><br>Time in target glucose: <b>unlikely</b> | <b>High downgrade to moderate</b> <sup>a</sup> |
| Grommesh (2016) <sup>34</sup>      | <b>Serious</b>                                  | Mean BGL: <b>Yes</b><br>Time in target glucose: <b>Yes</b> | Mean BGL: <b>No</b><br>Time in target glucose: <b>No</b> | Mean BGL: <b>No</b><br>Time in target glucose: <b>No</b>   | Mean BGL: <b>likely</b><br>Time in target glucose: <b>likely</b>     | <b>High downgrade to very low</b> <sup>b</sup> |
| Lakhani (2016) <sup>33</sup>       | <b>Serious</b>                                  | Mean BGL: <b>No</b><br>Time in target glucose: <b>No</b>   | Mean BGL: <b>No</b><br>Time in target glucose: <b>No</b> | Mean BGL: <b>No</b><br>Time in target glucose: <b>No</b>   | Mean BGL: <b>unlikely</b><br>Time in target glucose: <b>unlikely</b> | <b>High downgrade to moderate</b> <sup>c</sup> |
| Radhakutty (2016) <sup>35</sup>    | <b>Serious</b>                                  | Mean BGL: <b>No</b><br>Time in target glucose: <b>No</b>   | Mean BGL: <b>No</b><br>Time in target glucose: <b>No</b> | Mean BGL: <b>No</b><br>Time in target glucose: <b>No</b>   | Mean BGL: <b>likely</b><br>Time in target glucose: <b>likely</b>     | <b>High downgrade to low</b> <sup>d</sup>      |
| Ruiz de Adana (2016) <sup>36</sup> | <b>Serious</b>                                  | Mean BGL: <b>No</b><br>Time in target glucose: <b>No</b>   | Mean BGL: <b>No</b><br>Time in target glucose: <b>No</b> | Mean BGL: <b>No</b><br>Time in target glucose: <b>No</b>   | Mean BGL: <b>unlikely</b><br>Time in target glucose: <b>unlikely</b> | <b>High downgrade to moderate</b> <sup>e</sup> |
| <b>Observational studies</b>       |                                                 |                                                            |                                                          |                                                            |                                                                      |                                                |
| Burt (2015) <sup>38</sup>          | <b>Not serious</b>                              | Mean BGL: <b>No</b>                                        | Mean BGL: <b>No</b>                                      | Mean BGL: <b>No</b>                                        | Mean BGL: <b>unlikely</b>                                            | <b>Low</b>                                     |
| Dhital (2012) <sup>39</sup>        | <b>Not serious</b>                              | Mean BGL: <b>No</b>                                        | Mean BGL: <b>No</b>                                      | Mean BGL: <b>No</b>                                        | Mean BGL: <b>unlikely</b>                                            | <b>Low</b>                                     |
| Gosmanov (2013) <sup>40</sup>      | <b>Serious</b>                                  | Mean BGL: <b>No</b>                                        | Mean BGL: <b>No</b>                                      | Mean BGL: <b>No</b>                                        | Mean BGL: <b>unlikely</b>                                            | <b>Low downgrade to very low</b> <sup>f</sup>  |

<sup>a</sup> downgrading because of serious imprecision with lack of CI; <sup>b</sup> downgrading because of serious limitations/risk of bias; lack of blinding and attending physicians were not obliged to follow the study protocol while titrating insulin doses, and inconsistency with small sample groups and publications bias with lack of significant results; <sup>c</sup> downgrading because of serious limitations/risk of bias; lack of blinding; <sup>d</sup> downgrading because of serious limitations/risk of bias; lack of blinding, and industry funding; <sup>e</sup> downgrading because of serious limitations/risk of bias, not randomised sequence generation, lack of allocation concealment; <sup>f</sup> downgrading because of serious limitation in eligibility criteria as “self-reported diagnosis of diabetes”.

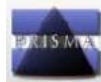

# PRISMA 2009 Checklist

1  
2  
3  
4  
5  
6  
7  
8  
9  
10  
11  
12  
13  
14  
15  
16  
17  
18  
19  
20  
21  
22  
23  
24  
25  
26  
27  
28  
29  
30  
31  
32  
33  
34  
35  
36  
37  
38  
39  
40  
41  
42  
43  
44  
45  
46  
47

| Section/topic                      | #  | Checklist item                                                                                                                                                                                                                                                                                              | Reported on page # |
|------------------------------------|----|-------------------------------------------------------------------------------------------------------------------------------------------------------------------------------------------------------------------------------------------------------------------------------------------------------------|--------------------|
| <b>TITLE</b>                       |    |                                                                                                                                                                                                                                                                                                             |                    |
| Title                              | 1  | Identify the report as a systematic review, meta-analysis, or both.                                                                                                                                                                                                                                         | 1                  |
| <b>ABSTRACT</b>                    |    |                                                                                                                                                                                                                                                                                                             |                    |
| Structured summary                 | 2  | Provide a structured summary including, as applicable: background; objectives; data sources; study eligibility criteria, participants, and interventions; study appraisal and synthesis methods; results; limitations; conclusions and implications of key findings; systematic review registration number. | 2-3                |
| <b>INTRODUCTION</b>                |    |                                                                                                                                                                                                                                                                                                             |                    |
| Rationale                          | 3  | Describe the rationale for the review in the context of what is already known.                                                                                                                                                                                                                              | 4-5                |
| Objectives                         | 4  | Provide an explicit statement of questions being addressed with reference to participants, interventions, comparisons, outcomes, and study design (PICOS).                                                                                                                                                  | 5-6                |
| <b>METHODS</b>                     |    |                                                                                                                                                                                                                                                                                                             |                    |
| Protocol and registration          | 5  | Indicate if a review protocol exists, if and where it can be accessed (e.g., Web address), and, if available, provide registration information including registration number.                                                                                                                               | 6                  |
| Eligibility criteria               | 6  | Specify study characteristics (e.g., PICOS, length of follow-up) and report characteristics (e.g., years considered, language, publication status) used as criteria for eligibility, giving rationale.                                                                                                      | 6                  |
| Information sources                | 7  | Describe all information sources (e.g., databases with dates of coverage, contact with study authors to identify additional studies) in the search and date last searched.                                                                                                                                  | 7                  |
| Search                             | 8  | Present full electronic search strategy for at least one database, including any limits used, such that it could be repeated.                                                                                                                                                                               | Suppl Tbl 1        |
| Study selection                    | 9  | State the process for selecting studies (i.e., screening, eligibility, included in systematic review, and, if applicable, included in the meta-analysis).                                                                                                                                                   | 7-8                |
| Data collection process            | 10 | Describe method of data extraction from reports (e.g., piloted forms, independently, in duplicate) and any processes for obtaining and confirming data from investigators.                                                                                                                                  | 8                  |
| Data items                         | 11 | List and define all variables for which data were sought (e.g., PICOS, funding sources) and any assumptions and simplifications made.                                                                                                                                                                       | 8                  |
| Risk of bias in individual studies | 12 | Describe methods used for assessing risk of bias of individual studies (including specification of whether this was done at the study or outcome level), and how this information is to be used in any data synthesis.                                                                                      | 8                  |
| Summary measures                   | 13 | State the principal summary measures (e.g., risk ratio, difference in means).                                                                                                                                                                                                                               | n.a.               |
| Synthesis of results               | 14 | Describe the methods of handling data and combining results of studies, if done, including measures of consistency (e.g., $I^2$ ) for each meta-analysis.                                                                                                                                                   | n.a.               |

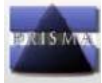

# PRISMA 2009 Checklist

Page 1 of 2

| Section/topic                 | #  | Checklist item                                                                                                                                                                                           | Reported on page #             |
|-------------------------------|----|----------------------------------------------------------------------------------------------------------------------------------------------------------------------------------------------------------|--------------------------------|
| Risk of bias across studies   | 15 | Specify any assessment of risk of bias that may affect the cumulative evidence (e.g., publication bias, selective reporting within studies).                                                             | 8.                             |
| Additional analyses           | 16 | Describe methods of additional analyses (e.g., sensitivity or subgroup analyses, meta-regression), if done, indicating which were pre-specified.                                                         | n.a.                           |
| <b>RESULTS</b>                |    |                                                                                                                                                                                                          |                                |
| Study selection               | 17 | Give numbers of studies screened, assessed for eligibility, and included in the review, with reasons for exclusions at each stage, ideally with a flow diagram.                                          | 9-10; Fig 1                    |
| Study characteristics         | 18 | For each study, present characteristics for which data were extracted (e.g., study size, PICOS, follow-up period) and provide the citations.                                                             | 9-10; Tbl 1                    |
| Risk of bias within studies   | 19 | Present data on risk of bias of each study and, if available, any outcome level assessment (see item 12).                                                                                                | 12-13;<br>Suppl Tbl 2<br>and 3 |
| Results of individual studies | 20 | For all outcomes considered (benefits or harms), present, for each study: (a) simple summary data for each intervention group (b) effect estimates and confidence intervals, ideally with a forest plot. | 10-12;<br>Table 2              |
| Synthesis of results          | 21 | Present results of each meta-analysis done, including confidence intervals and measures of consistency.                                                                                                  | 9-12.                          |
| Risk of bias across studies   | 22 | Present results of any assessment of risk of bias across studies (see Item 15).                                                                                                                          | n.a.                           |
| Additional analysis           | 23 | Give results of additional analyses, if done (e.g., sensitivity or subgroup analyses, meta-regression [see Item 16]).                                                                                    | n.a.                           |
| <b>DISCUSSION</b>             |    |                                                                                                                                                                                                          |                                |
| Summary of evidence           | 24 | Summarize the main findings including the strength of evidence for each main outcome; consider their relevance to key groups (e.g., healthcare providers, users, and policy makers).                     | 14-15                          |
| Limitations                   | 25 | Discuss limitations at study and outcome level (e.g., risk of bias), and at review-level (e.g., incomplete retrieval of identified research, reporting bias).                                            | 16                             |
| Conclusions                   | 26 | Provide a general interpretation of the results in the context of other evidence, and implications for future research.                                                                                  | 16-17                          |
| <b>FUNDING</b>                |    |                                                                                                                                                                                                          |                                |
| Funding                       | 27 | Describe sources of funding for the systematic review and other support (e.g., supply of data); role of funders for the systematic review.                                                               | 17                             |

From: Moher D, Liberati A, Tetzlaff J, Altman DG, The PRISMA Group (2009). Preferred Reporting Items for Systematic Reviews and Meta-Analyses: The PRISMA Statement. PLoS Med 6(7): e1000097. doi:10.1371/journal.pmed1000097

For more information, visit: [www.prisma-statement.org](http://www.prisma-statement.org)  
For peer review only - <http://bmjopen.bmj.com/site/about/guidelines.xhtml>



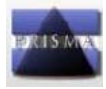

# PRISMA 2009 Checklist

For peer review only

- 1
- 2
- 3
- 4
- 5
- 6
- 7
- 8
- 9
- 10
- 11
- 12
- 13
- 14
- 15
- 16
- 17
- 18
- 19
- 20
- 21
- 22
- 23
- 24
- 25
- 26
- 27
- 28
- 29
- 30
- 31
- 32
- 33
- 34
- 35
- 36
- 37
- 38
- 39
- 40
- 41
- 42
- 43
- 44
- 45
- 46
- 47

# BMJ Open

## Management of hyperglycemia in persons with non-insulin-dependent Type 2 Diabetes mellitus that are started on systemic glucocorticoid therapy: a systematic review

|                                 |                                                                                                                                                                                                                                                                                                                                                                                                                                                                                                                                                                                                                                                                                                                            |
|---------------------------------|----------------------------------------------------------------------------------------------------------------------------------------------------------------------------------------------------------------------------------------------------------------------------------------------------------------------------------------------------------------------------------------------------------------------------------------------------------------------------------------------------------------------------------------------------------------------------------------------------------------------------------------------------------------------------------------------------------------------------|
| Journal:                        | <i>BMJ Open</i>                                                                                                                                                                                                                                                                                                                                                                                                                                                                                                                                                                                                                                                                                                            |
| Manuscript ID                   | bmjopen-2019-028914.R1                                                                                                                                                                                                                                                                                                                                                                                                                                                                                                                                                                                                                                                                                                     |
| Article Type:                   | Research                                                                                                                                                                                                                                                                                                                                                                                                                                                                                                                                                                                                                                                                                                                   |
| Date Submitted by the Author:   | 05-Apr-2019                                                                                                                                                                                                                                                                                                                                                                                                                                                                                                                                                                                                                                                                                                                |
| Complete List of Authors:       | Tatalovic, Milos; UniversitatsSpital Zurich, Department of Internal Medicine; Stadtspital Waid, Department of Internal Medicine<br>Lehmann, Roger; UniversitatsSpital Zurich, Department of Endocrinology, Diabetes and Clinical Nutrition<br>Cheetham, Marcus; UniversitatsSpital Zurich, Department of Internal Medicine; University of Zurich, Center of Competence Multimorbidity<br>Nowak, Albina; UniversitatsSpital Zurich, Department of Endocrinology, Diabetes and Clinical Nutrition<br>Bategay, Edouard; UniversitatsSpital Zurich, Department of Internal Medicine; University of Zurich, Center of Competence Multimorbidity<br>Rampini, Silvana; UniversitatsSpital Zurich, Department of Internal Medicine |
| <b>Primary Subject Heading</b>: | Diabetes and endocrinology                                                                                                                                                                                                                                                                                                                                                                                                                                                                                                                                                                                                                                                                                                 |
| Secondary Subject Heading:      | Evidence based practice, General practice / Family practice, Pharmacology and therapeutics                                                                                                                                                                                                                                                                                                                                                                                                                                                                                                                                                                                                                                 |
| Keywords:                       | Type 2 Diabetes, hyperglycemia, glucocorticoid therapy, hypoglycemic agent, NPH insulin, BBI                                                                                                                                                                                                                                                                                                                                                                                                                                                                                                                                                                                                                               |
|                                 |                                                                                                                                                                                                                                                                                                                                                                                                                                                                                                                                                                                                                                                                                                                            |

SCHOLARONE™  
Manuscripts

1  
2  
3  
4 1 **Management of hyperglycemia in persons with non-insulin-**  
5  
6  
7 2 **dependent Type 2 Diabetes mellitus that are started on systemic**  
8  
9  
10 3 **glucocorticoid therapy: a systematic review**  
11  
12

---

13  
14 4 **Running Title:** Management of glucocorticoid-induced hyperglycemia in Type 2 DM  
15

16  
17 5 **Milos Tatalovic<sup>1,2</sup>, Roger Lehmann<sup>3</sup>, Marcus Cheetham<sup>1,4,5</sup>, Albina Nowak<sup>3</sup>, Edouard**  
18  
19 6 **Battegay<sup>1,4,5</sup>, Silvana K. Rampini<sup>1</sup>**  
20

21  
22 7 <sup>1</sup>Department of Internal Medicine, University Hospital Zurich, University of Zurich,  
23  
24 8 Rämistrasse 100, 8091 Zurich, Switzerland  
25

26  
27 9 <sup>2</sup>current affiliation: Stadt Zürich Stadtpital Waid, Tièchestrasse 99, 8037 Zurich, Switzerland  
28

29 10 <sup>3</sup>Department of Endocrinology, Diabetes and Clinical Nutrition, University Hospital Zurich,  
30  
31 11 Raemistrasse 100, 8091 Zurich, Switzerland  
32

33  
34 12 <sup>4</sup>Center of Competence Multimorbidity, University of Zurich, Zurich, Switzerland  
35

36  
37 13 <sup>5</sup>University Research Priority Program Dynamics of Healthy Aging, University of Zurich,  
38  
39 14 Zurich, Switzerland  
40

41  
42 15 **Corresponding author:** Silvana K. Rampini, Email: [silvana.rampini@usz.ch](mailto:silvana.rampini@usz.ch)  
43  
44  
45

46 16 **KEY WORDS**  
47

48  
49 17 Type 2 Diabetes, hyperglycemia, glucocorticoid therapy, hypoglycemic agent, insulin, NPH  
50  
51 18 insulin, long-acting insulin, BBI, SSI, multimorbidity, disease-disease medication interaction  
52  
53  
54  
55  
56  
57  
58  
59  
60

1  
2  
3 19 **ABSTRACT**  
4  
5

6 20 **Objectives** What is the most effective pharmacological intervention for glycemic control in  
7  
8 21 known Type 2 Diabetes mellitus (DM) without prior insulin treatment and newly started on  
9  
10 22 systemic glucocorticoid therapy?  
11  
12

13 23 **Design** We conducted a systematic literature review.  
14  
15

16 24 **Data Sources** We searched Medline, Embase, Cochrane Library databases and Google for  
17  
18 25 articles from 2002 to July 2018.  
19  
20

21 26 **Eligibility Criteria** We combined search terms relating to DM (patients, > 16 years of age),  
22  
23 27 systemic glucocorticoids, glycemic control, randomized controlled trials (RCTs) and  
24  
25 28 observational studies.  
26  
27  
28

29 29 **Data extraction and synthesis** We screened and evaluated articles, extracted data, and assessed  
30  
31 30 risk of bias and quality of evidence, according to Grading of Recommendations assessment,  
32  
33 31 Development, and Evaluation (GRADE) guidelines.  
34  
35

36 32 **Results** Eight of 2'365 articles met full eligibility criteria. Basal-bolus insulin (BBI) strategy  
37  
38 33 for patients under systemic glucocorticoid therapy was comparatively effective but provided  
39  
40 34 insufficient glucose control depending on time of day. BBI strategy with long-acting insulin  
41  
42 35 and Neutral Protamin Hagedorn as basal insulin provide similar overall glycemic control.  
43  
44 36 Addition of various insulin strategies to standard BBI delivered mixed results. Intermediate-  
45  
46 37 acting insulin as additional insulin conferred no clear benefits and glycemic control with sliding  
47  
48 38 scale insulin was inferior to BBI or intermediate-acting insulin. No studies addressed whether  
49  
50 39 anticipatory or compensatory insulin adjustments are better for glycemic control.  
51  
52

53  
54  
55 40 **Conclusion** The lack of suitably designed RCTs and observational studies, heterogeneity of  
56  
57 41 interventions, target glucose levels, and glucose monitoring, poor control of DM subgroups,  
58  
59 42 and low-to-moderate quality of evidence render identification of optimal pharmacological  
60

1  
2  
3 43 interventions for glycemic control and insulin management difficult. Even findings on widely  
4  
5 44 recommended BBI regimen as intensive insulin therapy for DM patients on glucocorticoids are  
6  
7  
8 45 inconclusive. High quality evidence in studies with well-defined DM phenotypes, settings and  
9  
10 46 treatment approaches is needed to determine optimal pharmacological intervention for  
11  
12 47 glycemic control.  
13  
14  
15

## 16 48 **STRENGTHS AND LIMITATIONS OF THIS STUDY**

- 19 49 • Systematic review with extensive literature search to provide comprehensive data on a very  
20  
21 50 common but unresolved daily problem in managing Type 2 DM.
- 23 51 • Lack of comparability between studied populations and interventions and low to moderate  
24  
25 52 quality of evidence does not permit full quantitative analysis and provision of formal  
26  
27  
28 53 recommendations on specific insulin regimens.
- 30 54 • Firm conclusions on optimal pharmacological interventions for glycemic control awaits  
31  
32 55 studies of sufficient power, quality and testing of well-defined DM phenotypes, settings and  
33  
34  
35 56 treatments.  
36  
37  
38  
39  
40  
41  
42  
43  
44  
45  
46  
47  
48  
49  
50  
51  
52  
53  
54  
55  
56  
57  
58  
59  
60

## 57 INTRODUCTION

58 The worldwide prevalence of Type 2 Diabetes mellitus (DM) in adults has doubled since 1980  
59 to 8.5% in 2014 <sup>1</sup>. While comparatively stable in recent years, the prevalence of hospitalized  
60 patients with DM is 25-40% <sup>2 3</sup>. Steroid treatment in patients with DM is common <sup>4 5</sup>. However,  
61 steroids are the main cause of drug-induced hyperglycemia <sup>6</sup> due to their effect of increasing  
62 basal endogenous glucose production and lowering insulin sensitivity <sup>7-9</sup>. Over half of patients  
63 receiving high-dose steroids develop hyperglycemia <sup>10</sup>. Significantly, steroids exacerbate  
64 hyperglycemia in patients with pre-existing DM <sup>11 12</sup> and enhance the likelihood of  
65 complications, length of stay and mortality in these patients <sup>3 13-18</sup>.

66 The importance of detecting and actively managing hyperglycemia in DM patients receiving  
67 glucocorticoid therapy is acknowledged <sup>13 19 20</sup>. However, current management strategies are  
68 suboptimal <sup>13 21</sup> and the limited evidence available does not adequately inform the physician <sup>6</sup>.  
69 This is all the more important as the type and doses of administered glucocorticoids and the  
70 potencies (and duration of action) of different systemic glucocorticoids vary widely <sup>22-24</sup>.  
71 Shorter courses of steroids may lead to brief periods of hyperglycemia that do not require  
72 further intervention, though hyperglycemia and other side effects can occur at a wide range of  
73 doses <sup>25</sup>. However, longer courses of steroids at higher doses can lead to symptomatic  
74 hyperglycemia <sup>26 27</sup>. Optimal treatment strategies for glycaemic control are therefore vital.

75 The aim of this study was to conduct a systematic review of treatment strategies for glycaemic  
76 control in persons with Type 2 DM on diet or oral hypoglycaemic agents (OHA) and newly-  
77 initiated glucocorticoid therapy. Specifically, we sought to identify the most effective  
78 pharmacological intervention for glycaemic control. We evaluated also, whether the  
79 simultaneous start of insulin with glucocorticoids (anticipatory treatment adjustment) or

1  
2  
3  
4  
5  
6  
7  
8  
9  
10  
11  
12  
13  
14  
15  
16  
17  
18  
19  
20  
21  
22  
23  
24  
25  
26  
27  
28  
29  
30  
31  
32  
33  
34  
35  
36  
37  
38  
39  
40  
41  
42  
43  
44  
45  
46  
47  
48  
49  
50  
51  
52  
53  
54  
55  
56  
57  
58  
59  
60

80 delayed start of insulin, when blood glucose level (BGL) exceeds normal upper limits  
81 (compensatory treatment adjustment), is more effective.

For peer review only

## 82 **METHODS**

### 83 **Protocol and registration**

84 The review methods and eligibility criteria were specified in advance, documented in a study  
85 protocol, registered online with the International Prospective Register of Systematic Reviews  
86 (PROSPERO), May 31<sup>st</sup> 2016 (Registration Number CRD42015024739), and recorded with a  
87 PRISMA statement<sup>28</sup>. We updated the protocol once on October 21<sup>st</sup> 2016 to broaden inclusion  
88 criteria.

### 89 **Eligibility Criteria**

90 For eligibility, we followed the Patients, Interventions, Comparisons, Outcomes and Settings  
91 (PICOS) criteria<sup>28</sup>. **Patients:** We included articles on non-critically ill (non-ICU) in- or  
92 outpatients (> 16 years of age) who suffered from Type 2 DM treated with diet or OHA (*i.e.*,  
93 biguanide, gliflozins, gliptins, sulfonylureas, glinides, incretins or glitazones) and were started  
94 on a once or multiple daily oral or intravenous glucocorticoid therapy (*i.e.*, hydrocortisone,  
95 prednisone, prednisolone, methylprednisolone, dexamethasone, betamethasone or  
96 fludrocortisone) irrespective of the indication. **Interventions:** The articles and studies had to  
97 address specific treatment interventions for glycemic control, including, for example, stop  
98 routine DM medication and starting insulin treatment. **Comparisons:** We included all types of  
99 comparisons of the study population with those i) without DM, ii) without glucocorticoid  
100 treatment, iii) with adjusted OHA, or iv) with differing insulin treatments. **Outcomes:** We  
101 accepted outcomes reflecting glycemic control, that is, time outside target glucose range, mean  
102 BGL, hypo- or hyperglycemic episodes, and daily insulin dose. **Settings:** We included  
103 randomized controlled trials (RCTs) and observational studies, that is, cohort studies, case-  
104 control studies or cross-sectional studies, without imposing any restriction on language, country  
105 of origin, or publication type. We excluded letters to the editor and conference abstracts. We



1  
2  
3 106 consulted also guidelines, reviews, and expert opinions. We considered only papers published  
4  
5 107 after 2002 because of the subsequent introduction of long-acting insulin; long-acting insulins  
6  
7 108 are, nowadays, an integral part of treatment in insulin dependent DM.  
8  
9

### 10 11 109 **Search strategy**

12  
13  
14 110 We identified articles based on search terms related to DM and glucocorticoids in the following  
15  
16 111 databases: Medline and Pre-Medline using OVID, EMBASE and Cochrane Library electronic  
17  
18 112 databases (Supplementary Table 1). The combined use of the databases (PubMed, Medline,  
19  
20 113 Embase and Cochrane) allows coverage of up to 97% of available publications<sup>29</sup>. To enhance  
21  
22 114 coverage further, we conducted also a Google search to retrieve grey literature with exclusive  
23  
24 115 focus on pdf-files. The search was conducted on July 8<sup>th</sup> 2016 and updated on July 2<sup>nd</sup> 2018.  
25  
26  
27

### 28 116 **Study Selection**

29  
30  
31 117 MT and SKR independently screened a sample of 100 papers by studying the title and abstract  
32  
33 118 according to the selection criteria ‘adult persons with preexisting DM that received a  
34  
35 119 glucocorticoid therapy’. If no abstract was available but the title appeared relevant, MT and  
36  
37 120 SKR reviewed the full-text. One abstract was translated from Japanese.  
38  
39  
40

41 121 MT and SKR then evaluated the first 100 papers in consensus to establish the basis for  
42  
43 122 consistent screening of all further papers. MT performed the screening of all papers and SKR  
44  
45 123 independently double-screened a random sample of 10% of all articles. All articles were  
46  
47 124 assigned to one of the three eligibility groups, “Yes”, “No” and “Maybe”. The “Maybe” group  
48  
49 125 was discussed by MT and SKR for eligibility after full-text review in a consensus conference.  
50  
51 126 Initial review of eligible articles revealed the necessity for modification of the inclusion  
52  
53 127 criterion ‘ $\geq 20$  mg/d prednisolone-equivalent for  $\geq 5$  days’ to ‘intermediate or high-dose  
54  
55 128 glucocorticoid therapy’ because a large number of articles did not specify exact dosages of  
56  
57 129 glucocorticoids.  
58  
59  
60

1  
2  
3 130 MT and SRK independently performed a full-text review of all eligible papers for inclusion,  
4  
5 131 considering the PICOS criteria. Disagreements between reviewers were resolved by consensus.  
6  
7 132 Finally, the reference lists of all included articles were screened for additional eligible papers,  
8  
9 133 guidelines, and review articles.  
10  
11  
12

### 13 134 **Data extraction and quality assessment**

14  
15  
16 135 We extracted the following data from the included articles: study population, participants, and  
17  
18 136 age. Then, we assessed indication, dosage and duration of glucocorticoid therapy, target  
19  
20 137 glucose, insulin strategy, the management of OHA interruption, continuation or adjustment of  
21  
22 138 dosages, and outcome measures, such as, time in target glucose range, mean BGL, hypo- and  
23  
24 139 hyperglycemic episodes, insulin requirement. Differing assessments were discussed and  
25  
26 140 resolved between MT and SKR.  
27  
28  
29

30 141 We used the Cochrane risk of bias tool <sup>30</sup> to evaluate the risk of bias in RCTs and applied the  
31  
32 142 key criteria of the Grading of Recommendations Assessment, Development and Evaluation  
33  
34 143 (GRADE) guidelines for observational studies to assess the methodological quality of  
35  
36 144 nonrandomized studies <sup>31</sup>. The overall quality of evidence was assessed using the GRADE  
37  
38 145 criteria <sup>32</sup>.  
39  
40  
41  
42

### 43 146 **Data synthesis**

44  
45  
46 147 We performed a descriptive analysis of RCTs and observational studies. This was because the  
47  
48 148 lack of concordance in the study designs in the included articles precluded the performance of  
49  
50 149 meta-analyses. Included articles were evaluated and compared in detail and findings  
51  
52 150 summarized.  
53  
54  
55  
56  
57  
58  
59  
60

1  
2  
3 151 **Patient or public involvement**  
4

5  
6 152 Neither patients nor public were directly involved in the development of the research question,  
7

8 153 selection of the outcome measures, design and implementation of the study, or interpretation of  
9

10 154 the results.  
11  
12  
13  
14  
15  
16  
17  
18  
19  
20  
21  
22  
23  
24  
25  
26  
27  
28  
29  
30  
31  
32  
33  
34  
35  
36  
37  
38  
39  
40  
41  
42  
43  
44  
45  
46  
47  
48  
49  
50  
51  
52  
53  
54  
55  
56  
57  
58  
59  
60

For peer review only

## 155 **RESULTS**

### 156 **Study inclusion**

157 Our initial search generated 3'521 articles. 2'365 articles remained after eliminating duplicate  
158 entries. Of these, 37 qualified for full text review. Eight articles met full eligibility criteria,  
159 namely, four RCTs <sup>33-36</sup> with open-label and parallel group design, one RCT with open-label  
160 and cross-over design <sup>37</sup>, and three observational studies <sup>38-40</sup> with retrospective cohort design  
161 (Fig. 1 and Table 1).

162 The eight articles reported studies that included a total of 481 persons, 343/481 persons with  
163 DM and 138/481 persons with glucocorticoid-induced hyperglycemia. One study included  
164 persons with both Type 1 and 2 DM but did not take this distinction into consideration for  
165 outcomes <sup>33</sup>. At least 85/481 persons had prior treatment with insulin; three studies did not  
166 provide this information <sup>33 34 39</sup>. Seven studies included inpatients only <sup>33-36 38-40</sup>, and one study  
167 included both in- and outpatients <sup>37</sup>. Capillary blood glucose was measured four times a day,  
168 by continuous glucose monitoring or by using all available capillary and serum blood glucose  
169 readings (Table 2). The upper limit was a BGL of 10mmol/l in all studies. The lower BGL limit  
170 was 3.9-4.5mmol/l in all but two studies in which it was 5.6mmol/l <sup>33 40</sup> (Table 2). Insulin dose  
171 adjustments were applied if BGL was outside target glucose range, according to specific study  
172 protocols.

173 In six studies, authors treated control groups with a basal-bolus insulin (BBI) regimen using  
174 insulin glargine as basal insulin <sup>33-36 38 39</sup>, in one study with a BBI regimen using twice-daily  
175 insulin detemir <sup>40</sup>, and one study using sliding-scale insulin (SSI) in addition to established DM  
176 medication <sup>37</sup>. Strikingly, treatment interventions in the experimental groups diverged  
177 substantially: One study compared glycemic control of BBI regimen in Type 2 DM patients  
178 without prednisolone with those with prednisolone treatment <sup>38</sup>. Another study compared

1  
2  
3 179 glycemic control of BBI regimen with SSI regimen <sup>40</sup>. One study compared addition of SSI to  
4  
5 180 routine DM medication with the addition of intermediate-acting insulin <sup>37</sup>. Three studies  
6  
7 181 compared BBI regimens with long-acting insulins to BBI regimens with intermediate-acting  
8  
9 182 Neutral Protamin Hagedorn (NPH) insulin <sup>35 36 39</sup>, but in one of these studies NPH was given in  
10  
11 183 three equal prandial doses <sup>36</sup>. One study compared BBI regimen with long-acting insulin to the  
12  
13 184 same regimen with the addition of NPH insulin <sup>34</sup>. Finally, the most recent study added the  
14  
15 185 insulin type that matched the glycemic profile of the administered glucocorticoid <sup>33</sup>. This  
16  
17 186 divergence in study designs of RCTs precluded a clean and coherent quantitative meta-analysis.  
18  
19  
20  
21

### 22 187 **BBI strategy in persons under systemic glucocorticoid therapy**

23  
24  
25 188 Two observational studies <sup>38 40</sup> report BBI as superior in glucocorticoid-treated Type 2 DM  
26  
27 189 patients <sup>41 42</sup>. Gosmanov *et al.* <sup>40</sup> found more hyperglycemic events in Type 2 DM patients under  
28  
29 190 dexamethasone for 3 days (for a hematologic malignancy) when treated with SSI therapy  
30  
31 191 compared with a BBI therapy (Table 2). In the SSI group, mean daily BGL was significantly  
32  
33 192 higher ( $p < 0.001$ ) and average insulin requirement was significantly lower ( $p < 0.001$ ). No  
34  
35 193 hypoglycemic events occurred in either groups but 3/28 (11%) persons treated with SSI were  
36  
37 194 referred to an intensive care unit because of hyperglycemic events.  
38  
39  
40

41  
42 195 Burt *et al.* <sup>38</sup> studied the effectiveness of a BBI regimen in hospitalized Type 2 DM patients  
43  
44 196 treated with prednisolone in the morning for an acute medical condition compared with those  
45  
46 197 without glucocorticoid treatment. Half of the calculated daily dose was given as long-acting  
47  
48 198 insulin Glargine at 9 pm and half as bolus evenly split into three meal dosages of rapid-acting  
49  
50 199 insulin with additional correctional insulin when necessary. Mean daily BGL was significantly  
51  
52 200 higher in the prednisolone group ( $p < 0.001$ ) (Table 2). More specifically, BGL was significantly  
53  
54 201 higher at 5 and 9 p.m. but not significantly higher at 7 and 12 a.m.. In addition, the daily insulin  
55  
56 202 dose was significantly higher in the prednisolone-treated group than in the control group,  
57  
58  
59  
60

203 especially at 12 a.m. and 5 p.m.. Thus, BBI treatment provided insufficient glucose control,  
204 most notably in the afternoon and evening.

### 205 **Comparison of BBI regimen with long-acting insulin to NPH as basal insulin**

206 Two RCTs<sup>36 35</sup> and one observational study<sup>39</sup> compared NPH insulin with the long-acting  
207 insulin Glargine in a BBI regimen for their efficacy in controlling BGL in hospitalized persons  
208 treated with medium- to high-dose glucocorticoids<sup>36 39</sup>. The studies differed substantially in  
209 their design (Table 1). Radhakutty *et al.*<sup>35</sup> included persons with or without Type 2 DM who  
210 were treated with a single dose of glucocorticoids for respiratory disease or gout. Glargine was  
211 administered in the control and NPH in the experimental group at 7 a.m.. Ruiz de Adana *et al.*  
212<sup>36</sup> studied Type 2 DM patients receiving multiple daily doses of glucocorticoids for respiratory  
213 disease. The Glargine group received its basal insulin as one dose at 9 a.m. and the NPH group  
214 received it before breakfast, lunch and dinner in three equal doses. Dhital *et al.*<sup>39</sup> retrospectively  
215 studied adults treated with prednisone who were on a BBI regimen with either insulin glargine  
216 or NPH. Notably, the target glucose range, the time of application and number of doses of basal  
217 insulins were not indicated here, and persons with hyperglycemia without underlying Type 2  
218 DM were also included.

219 All three studies show a similar overall glycaemic control for NPH or Glargine as basal insulin  
220<sup>35 36 39</sup>. More specifically, the mean daily BGL and the number of mild hypoglycaemic episodes  
221 per day were similar (Table 2). Notably, severe hypoglycemia (BGL < 2.22 mmol/l) occurred  
222 in two persons in the NPH group in the study by Ruiz de Adana *et al.*<sup>36</sup>. Only Dhital *et al.*<sup>39</sup>  
223 found significantly lower daily insulin requirement in the NPH group.

### 224 **Addition of insulin to established DM medication**

225 Gerards *et al.*<sup>37</sup> compared the addition of SSI insulin compared with intermediate-acting insulin  
226 (IMI) to established DM medication for glycaemic control. The types of insulin were not further

1  
2  
3 227 defined. Half of the persons had prior insulin treatment. Addition of IMI resulted in significantly  
4  
5 228 longer time in target glucose range ( $p<0.001$ ) and lower mean daily BGL ( $p<0.05$ ). This was  
6  
7 229 achieved with an increased insulin requirement in IMI group. Remarkably, mean daily BGL of  
8  
9 230 both groups (SSI  $13.5 \pm 2.8$ , IMI  $12.4 \pm 2.9$ ) were higher than in all other studies (Table 2).  
11  
12 231 Two RCTs added insulin to an existing BBI regimen in persons with or without Type 2 DM <sup>33</sup>  
13  
14 232 <sup>34</sup> (Table 1). Grommesh *et al.* <sup>34</sup> studied the addition of NPH insulin together with a  
15  
16 233 glucocorticoid to a BBI regimen. The algorithm for NPH dosing was based on glucocorticoid  
17  
18 234 type, dose, and pre-existing DM diagnosis. The study should that there was no advantage in this  
19  
20 235 for glycemic control, mean total daily insulin dose, or hypo- and hyperglycemia (Table 2).  
21  
22 236 Similarly, a RCT by Lakhani *et al.* <sup>33</sup> studied the addition of a so-called ‘correctional insulin’  
23  
24 237 together with the glucocorticoid to a BBI regimen. The type of ‘correctional insulin’ matched  
25  
26 238 the glycemic profile of the type of administered glucocorticoid, *for example* NPH insulin for  
27  
28 239 prednisolone or insulin glargine for dexamethasone treatment <sup>33</sup>. ‘Correctional insulin’  
29  
30 240 significantly improved “time in target pre-meal glucose range” (defined as 5.6-10mmol/l  
31  
32 241 [ $p=0.002$ ]) and mean daily BGL ( $p=0.0001$ ) but not time in “bedtime target glucose range”  
33  
34 242 ( $p=0.09$ ). The hyperglycemic events were reduced ( $p<0.001$ ). No data were provided on  
35  
36 243 subgroups without DM or with Type 1 DM and on daily insulin doses.

#### 244 **Anticipatory or compensatory approach to glycemic control**

245 We aimed to determine whether anticipatory or compensatory adjustments are better for  
246 glycemic control. No screened or included study addressed this issue. While screening articles,  
247 we found some recommendations about this in guidelines <sup>41 43-45</sup> and reviews <sup>46-50</sup> and we  
248 address this in the discussion section.

1  
2  
3 249 **Risk of bias and grading of evidence**  
4  
5

6 250 Risk of bias was assessed in five RCTs for seven domains and four outcomes (mean BGL, time  
7  
8 251 in target glucose, daily insulin dose and hypoglycemia) (Supplementary Table 2a). All RCTs  
9  
10 252 were unblinded for participants and personal. Although placebo effects are very unlikely,  
11  
12 253 unblinding may have affected the attention of staff. This might be the most relevant risk for  
13  
14 254 bias in these studies. The lack of random sequence generation and allocation concealment might  
15  
16 255 be another common bias. The three observational studies were classified as having a low <sup>38</sup>,  
17  
18 256 middle <sup>39</sup> and high <sup>40</sup> range of risk of bias (Supplementary Table 2b). The most common risk of  
19  
20 257 bias was the failure to control confounding. Notably, an overall risk of bias of an outcome for  
21  
22 258 all five RCTs is not so informative because the treatment interventions were not comparable.  
23  
24 259 Applying the GRADE criteria on each individual study, we had to decrease the level of evidence  
25  
26 260 for the primary outcomes “mean BGL” and “time in target glucose range.” This was mainly  
27  
28 261 because of risk of bias and publication bias and because of inconsistency and imprecision in the  
29  
30 262 five RCTs and one observational study (for the overall rating of quality of evidence in RCTs  
31  
32 263 and observational studies, see Supplementary Table 3). Hence, we classified the overall quality  
33  
34 264 of evidence for the individual interventions as moderate <sup>33 36 37</sup>, low <sup>35 38 39</sup> or very low <sup>34 40</sup>.



## 265 **DISCUSSION**

266 Glucocorticoid treatment inevitably leads to hyperglycemia in persons with Type 2 DM. We  
267 systematically reviewed the available evidence on pharmacological interventions for effective  
268 glycemic control. We found, firstly, that there is some uncertainty as to the optimal management  
269 of glucocorticoid-induced hyperglycemia in DM. The lack of studies reporting high quality  
270 evidence makes it difficult to provide formal and final recommendations. This review shows  
271 that the available evidence is of low to moderate quality. Second, the reviewed studies speak in  
272 favour of the use of BBI without a specific preference for long- or intermediate-acting insulin  
273 as basal insulin, but these studies do indicate that SSI should be abandoned. Third, two studies  
274 suggested that pharmacodynamic profiles of insulins should be reconciled with corresponding  
275 profiles of glucocorticoids. However, there is insufficient evidence to recommend this. Finally,  
276 the reviewed studies do not clarify whether one should initiate anticipatory or compensatory  
277 insulin treatment.

278 BBI is widely accepted and recommended as intensive insulin therapy in DM<sup>42 51 52</sup>. However,  
279 the question remains whether BBI performs best in Type 2 DM under glucocorticoid treatment.  
280 Five open label RCTs and three observational studies included in this systematic review address  
281 this issue. Gosmanov *et al.*<sup>40</sup> shows that BBI is better than SSI in terms of glycemic control.  
282 This is in line with data from various clinical settings that supports improved hyperglycemic  
283 control using BBI compared with SSI<sup>53 54</sup>. Gerards *et al.*<sup>37</sup> corroborates that SSI delivers poorer  
284 control compared with intermediate-acting insulin when used as an addition to the routine DM  
285 regimen. Although very popular among non-endocrinologists, these findings suggest that SSI  
286 treatment should not be prescribed in this setting anymore. On the other hand, Burt *et al.*<sup>38</sup> did  
287 find that glycemic control was insufficient at 5 p.m. and 9 p.m. when using BBI with long-  
288 acting insulin in Type 2 DM persons treated with prednisolone compared with those without  
289 prednisolone treatment. These findings are in line with previous reports of afternoon and

1  
2  
3 290 evening hyperglycemia under glucocorticoids in persons without DM <sup>24 27 55</sup>. Thus, BBI with  
4  
5 291 long-acting insulin does not offer a final solution.  
6  
7

8 292 The intermediate-acting NPH insulin provides good control of afternoon peaks of blood glucose  
9  
10 293 caused by glucocorticoids. This approach might have an advantage over long-acting insulin  
11  
12 294 because its effects show a similar timeline to that of glucocorticoid-induced afternoon peaks of  
13  
14 295 hyperglycemia <sup>56 57</sup>. Three of the reviewed articles <sup>35 36 39</sup> compared NPH insulin with insulin  
15  
16 296 Glargine as basal insulin in a BBI treatment in randomized controlled <sup>36 35</sup> and retrospective <sup>39</sup>  
17  
18 297 studies, finding no significant differences in glycemic control. However, NPH insulin caused  
19  
20 298 more hypoglycemic events when NPH and bolus insulin were administered in equal pre-  
21  
22 299 prandial doses for the purpose of controlling hyperglycemia in persons receiving multiple daily  
23  
24 300 doses of glucocorticoids <sup>36</sup>. Such a protocol may not be flexible enough in that it does not give  
25  
26 301 sufficient consideration to the night-time fasting period and the associated risk of nocturnal  
27  
28 302 hypoglycemia. Insulin requirement, however, was higher in BBI with long-acting insulin  
29  
30 303 compared with NPH as basal insulin in two of the studies <sup>36 39</sup> but it was similar in the other <sup>35</sup>.  
31  
32 304 The addition of NPH together with the glucocorticoid in the BBI treatment also failed to  
33  
34 305 improve glycemic control <sup>34</sup>. The most recent study by Lakhani *et al.* <sup>33</sup> suggests a unique  
35  
36 306 approach to better match the pharmacodynamical properties of insulins and glucocorticoids.  
37  
38 307 This resulted in significantly lower mean daily BGL and pre-meal time in target glucose range.  
39  
40 308 While the approach of Lakhani *et al.* <sup>33</sup> appears to be promising, it does need to be corroborated  
41  
42 309 in a larger study.  
43  
44  
45  
46  
47  
48  
49

50 310 We found no primary data comparing anticipatory with compensatory treatment adjustments  
51  
52 311 for glycemic control when starting glucocorticoids. This lack of data is a source of some  
53  
54 312 controversial expert opinions in guidelines. The American Endocrine Society Clinical Practice  
55  
56 313 Guidelines <sup>41</sup> recommends an anticipatory approach with discontinuation of OHA at the time  
57  
58 314 of hospital admission and initiation of insulin with persistent hyperglycemia. In exceptional  
59  
60

1  
2  
3 315 cases, selected persons who are stable, eating regularly and have no contraindication “may be  
4  
5 316 candidates for continuation of previously prescribed OHA”. The Canadian Diabetes  
6  
7 317 Association guideline<sup>45</sup> recommends that “glycemic monitoring for 48 hours after initiation of  
8  
9 318 steroids may be considered”. In contrast, the Joint British Diabetes Societies for inpatient care  
10  
11 319 guideline<sup>19</sup> and the Imperial College Clinical Guidance<sup>58</sup> recommend the up-titration of OHA  
12  
13 320 first. They recommend adding<sup>19</sup> or switching<sup>58</sup> to insulin if BGL remains above 10mmol/l.  
14  
15 321 Reports of experience or evidence to suggest the use of DDP-4 inhibitors, GLP-1 receptor  
16  
17 322 agonists or SGLT-2 inhibitors is lacking.

18  
19  
20  
21  
22 323 The strength of our systematic review is that it makes an important contribution to DM  
23  
24 324 management. It does this by highlighting the unresolved challenge of good glycemic control in  
25  
26 325 DM patients who are on systemic glucocorticoid therapy and by reporting an extensive  
27  
28 326 literature search on hyperglycemic control in these patients. However, we cannot draw  
29  
30 327 conclusions from our systematic analysis on the most effective management approach. This is  
31  
32 328 largely due to the low-to-moderate quality of available evidence and the lack of comparability  
33  
34 329 between the reviewed studies. In fact, this review draws attention to the heterogeneity of the  
35  
36 330 experimental designs and the lack of well powered, high quality studies. Given that the  
37  
38 331 populations, interventions, target glucose levels, and glucose monitoring differed from study to  
39  
40 332 study, the main limitation is that we can only provide a descriptive review of the studies but not  
41  
42 333 formal recommendations. Well-designed studies with more homogeneous patient populations  
43  
44 334 are needed in order to answer the questions raised in this review. The present review focused  
45  
46 335 on the population of persons with pre-existing Type 2 DM without prior insulin treatment.  
47  
48 336 However, we included articles with mixed populations, namely persons with Type 2 DM with  
49  
50 337 or without prior insulin treatment and Type 1 DM, because there is an insufficient number of  
51  
52 338 articles with the specific sub-group of interest. We acknowledge that this is not standard  
53  
54 339 practice in systematic reviews.  
55  
56  
57  
58  
59  
60

1  
2  
3 340 **CONCLUSION**  
4  
5

6 341 Glucocorticoid therapy exacerbates hyperglycemia in patients with pre-existing DM. Current  
7  
8 342 management strategies give insufficient guidance for glycaemic control in persons started on  
9  
10 343 glucocorticoids. The lack of relevant RCTs and observational studies, heterogeneity of  
11  
12 344 populations, interventions, target glucose levels, and glucose monitoring in available studies,  
13  
14 345 and low to moderate quality of available evidence make it difficult to identify pharmacological  
15  
16 346 interventions for effective glycaemic control. Even for the widely recommended use of a BBI  
17  
18 347 regimen as intensive insulin therapy in DM, the data on this regimen in DM patients on  
19  
20 348 glucocorticoids is inconclusive. Indeed, the findings of our systematic review clearly speak in  
21  
22 349 favour of the call to action on research in inpatient DM management of The PRIDE group <sup>59</sup>  
23  
24 350 and in outpatient care. A concerted effort of Diabetes Societies would be needed to develop  
25  
26 351 powerful study designs that take into account different DM phenotypes, settings and treatment  
27  
28 352 approaches.  
29  
30  
31  
32  
33  
34  
35  
36  
37  
38  
39  
40  
41  
42  
43  
44  
45  
46  
47  
48  
49  
50  
51  
52  
53  
54  
55  
56  
57  
58  
59  
60

1  
2  
3 353 **DECLARATIONS**  
4  
5

6  
7 354 **Competing interests**  
8  
9

10 355 The authors have no competing interests to declare.  
11  
12

13 356 **Funding**  
14  
15

16 357 No funding to declare.  
17  
18

19 358 **Authors contributions**  
20  
21

22 359 MT drafted the study, contributed to the development of the selection criteria and data  
23  
24 360 extraction criteria, developed the search strategy, elaborated the study selection, data extraction  
25  
26 361 and data synthesis, wrote the manuscript, provided feedback and approved the final manuscript.  
27  
28

29 362 RL provided expertise on DM, read the manuscript, provided feedback and approved the final  
30  
31 363 manuscript.  
32  
33

34 364 MC contributed to the writing of the manuscript.  
35  
36

37 365 AN read, provided feedback and approved the final manuscript.  
38  
39

40 366 EB drafted the study, contributed to the development of the selection criteria and data extraction  
41  
42 367 criteria, read the manuscript, provided feedback and approved the final manuscript.  
43  
44

45 368 SKR is the guarantor, drafted the study, contributed to the development of the selection criteria  
46  
47 369 and data extraction criteria, did the study selection, data extraction and data synthesis, wrote  
48  
49 370 the manuscript, provided feedback and approved the final manuscript.  
50  
51

52  
53 371 **Acknowledgements**  
54  
55

56 372 We thank Martina Gosteli (MG), University of Zurich, for assistance in constructing the  
57  
58 373 database.  
59  
60

1  
2  
3 374 **Data sharing statement**  
4  
5

6 375 All available data is included into the manuscript.  
7  
8  
9  
10  
11  
12  
13  
14  
15  
16  
17  
18  
19  
20  
21  
22  
23  
24  
25  
26  
27  
28  
29  
30  
31  
32  
33  
34  
35  
36  
37  
38  
39  
40  
41  
42  
43  
44  
45  
46  
47  
48  
49  
50  
51  
52  
53  
54  
55  
56  
57  
58  
59  
60

For peer review only

## 376 REFERENCES

1. WHO. Global Health Report on Diabetes. 2016:1-87.
2. NHS Digital. National Diabetes Inpatient Audit (NaDIA) - 2016. 2017 doi: <http://www.content.digital.nhs.uk/catalogue/PUB23539>.
3. Umpierrez GE, Isaacs SD, Bazargan N, et al. Hyperglycemia: an independent marker of in-hospital mortality in patients with undiagnosed diabetes. *The Journal of clinical endocrinology and metabolism* 2002;87(3):978-82. doi: 10.1210/jcem.87.3.8341 [published Online First: 2002/03/13]
4. Hans P, Vanthuyne A, Dewandre PY, et al. Blood glucose concentration profile after 10 mg dexamethasone in non-diabetic and type 2 diabetic patients undergoing abdominal surgery. *British journal of anaesthesia* 2006;97(2):164-70. doi: 10.1093/bja/ael111 [published Online First: 2006/05/16]
5. Fardet L, Petersen I, Nazareth I. Prevalence of long-term oral glucocorticoid prescriptions in the UK over the past 20 years. *Rheumatology (Oxford, England)* 2011;50(11):1982-90. doi: 10.1093/rheumatology/ker017 [published Online First: 2011/03/12]
6. Tamez-Perez HE, Quintanilla-Flores DL, Rodriguez-Gutierrez R, et al. Steroid hyperglycemia: Prevalence, early detection and therapeutic recommendations: A narrative review. *World journal of diabetes* 2015;6(8):1073-81. doi: 10.4239/wjd.v6.i8.1073 [published Online First: 2015/08/05]
7. Van Raalte DH, Nofrate V, Bunck MC, et al. Acute and 2-week exposure to prednisolone impair different aspects of (beta)-cell function in healthy men. *European Journal of Endocrinology* 2010;162(4):729-35.
8. Van Raalte DH, Brands M, Van Der Zijl NJ, et al. Low-dose glucocorticoid treatment affects multiple aspects of intermediary metabolism in healthy humans: A randomised controlled trial. *Diabetologia* 2011;54(8):2103-12.
9. Geer EB, Islam J, Buettner C. Mechanisms of glucocorticoid-induced insulin resistance: Focus on adipose tissue function and lipid metabolism. *Endocrinology and Metabolism Clinics of North America* 2014;43(1):75-102.
10. Fong AC, Cheung NW. The high incidence of steroid-induced hyperglycaemia in hospital. *Diabetes Res Clin Pract* 2013;99(3):277-80. doi: 10.1016/j.diabres.2012.12.023 [published Online First: 2013/01/10]
11. van Raalte DH, Ouwens DM, Diamant M. Novel insights into glucocorticoid-mediated diabetogenic effects: towards expansion of therapeutic options? *European journal of clinical investigation* 2009;39(2):81-93. doi: 10.1111/j.1365-2362.2008.02067.x [published Online First: 2009/02/10]
12. Perez A, Jansen-Chaparro S, Saigi I, et al. Glucocorticoid-induced hyperglycemia. *Journal of diabetes* 2014;6(1):9-20. doi: 10.1111/1753-0407.12090 [published Online First: 2013/10/10]
13. Wallymahmed ME, Dawes S, Clarke G, et al. Hospital in-patients with diabetes: increasing prevalence and management problems. *Diabetic medicine : a journal of the British Diabetic Association* 2005;22(1):107-9. doi: 10.1111/j.1464-5491.2004.01355.x [published Online First: 2004/12/21]
14. Khalid JM, Raluy-Callado M, Curtis BH, et al. Rates and risk of hospitalisation among patients with type 2 diabetes: retrospective cohort study using the UK General Practice Research Database linked to English Hospital Episode Statistics. *International Journal of Clinical Practice* 2014;68(1):40-48. doi: 10.1111/ijcp.12265
15. Pomposelli JJ, Baxter JK, 3rd, Babineau TJ, et al. Early postoperative glucose control predicts nosocomial infection rate in diabetic patients. *JPEN Journal of parenteral and enteral nutrition* 1998;22(2):77-81. [published Online First: 1998/04/07]
16. Menzin J, Korn JR, Cohen J, et al. Relationship between glycemic control and diabetes-related hospital costs in patients with type 1 or type 2 diabetes mellitus. *Journal of managed care*



- 1  
2  
3 426 pharmacy : *JMCP* 2010;16(4):264-75. doi: 10.18553/jmcp.2010.16.4.264 [published Online  
4 427 First: 2010/05/04]
- 5 428 17. Bloom RD, Crutchlow MF. Transplant-associated hyperglycemia. *Transplantation Reviews*  
6 429 2008;22(1):39-51.
- 7 430 18. Inzucchi SE. Management of hyperglycemia in the hospital setting. *New England Journal of*  
8 431 *Medicine* 2006;355(18):1903-11.
- 9 432 19. Roberts A, James J, Dhatariya K. Management of hyperglycaemia and steroid (glucocorticoid)  
11 433 therapy: a guideline from the Joint British Diabetes Societies (JBDS) for Inpatient Care group.  
12 434 *Diabetic medicine : a journal of the British Diabetic Association* 2018;35(8):1011-17. doi:  
13 435 10.1111/dme.13675 [published Online First: 2018/08/29]
- 14 436 20. Jannot-Lamotte MF, Raccah D. [Management of diabetes during corticosteroid therapy]. *Presse*  
15 437 *medicale (Paris, France : 1983)* 2000;29(5):263-6. [published Online First: 2000/03/04]
- 16 438 21. Hirsch IB. Sliding scale insulin--time to stop sliding. *Jama* 2009;301(2):213-4. doi:  
17 439 10.1001/jama.2008.943 [published Online First: 2009/01/15]
- 18 440 22. Ericson-Neilsen W, Kaye AD. Steroids: pharmacology, complications, and practice delivery issues.  
19 441 *The Ochsner journal* 2014;14(2):203-7. [published Online First: 2014/06/19]
- 20 442 23. National Institute for Health and Clinical Excellence (NICE) Clinical Knowledge Summaries:  
21 443 Corticosteroids - Oral. *NICE* 2012 doi: [http://www.cks.nhs.uk/corticosteroids\\_oral](http://www.cks.nhs.uk/corticosteroids_oral)
- 22 444 24. Yuen KCJ, McDaniel PA, Riddle MC. Twenty-four-hour profiles of plasma glucose, insulin, C-peptide  
23 445 and free fatty acid in subjects with varying degrees of glucose tolerance following short-term,  
24 446 medium-dose prednisone (20 mg/day) treatment: Evidence for differing effects on insulin  
25 447 secretion and action. *Clinical Endocrinology* 2012;77(2):224-32.
- 26 448 25. Kendall EC. Nobel lecture: The development of cortisone as a therapeutic agent. *Nobelprizeorg*  
27 449 1950 doi: <http://www.content.digital.nhs.uk/catalogue/PUB23539>.
- 28 450 26. Donihi AC, Raval D, Saul M, et al. Prevalence and predictors of corticosteroid-related hyperglycemia  
29 451 in hospitalized patients. *Endocrine practice : official journal of the American College of*  
30 452 *Endocrinology and the American Association of Clinical Endocrinologists* 2006;12(4):358-62.  
31 453 doi: 10.4158/ep.12.4.358 [published Online First: 2006/08/12]
- 32 454 27. Burt MG, Roberts GW, Aguilar-Loza NR, et al. Continuous monitoring of circadian glycemic patterns  
33 455 in patients receiving prednisolone for COPD. *The Journal of clinical endocrinology and*  
34 456 *metabolism* 2011;96(6):1789-96. doi: 10.1210/jc.2010-2729 [published Online First:  
35 457 2011/03/18]
- 36 458 28. Shamseer L, Moher D, Clarke M, et al. Preferred reporting items for systematic review and meta-  
37 459 analysis protocols (PRISMA-P) 2015: elaboration and explanation. *BMJ (Clinical research ed)*  
38 460 2015;349:g7647. doi: 10.1136/bmj.g7647 [published Online First: 2015/01/04]
- 39 461 29. Harris JD, Quatman CE, Manring MM, et al. How to write a systematic review. *The American journal*  
40 462 *of sports medicine* 2014;42(11):2761-8. doi: 10.1177/0363546513497567 [published Online  
41 463 First: 2013/08/09]
- 42 464 30. Higgins JP, Altman D. Assessing the risk of bias in included studies. . *Higgins JPT, Green S (editors)*  
43 465 *Cochrane Handbook for Systematic Reviews of Interventions Version 510 [updated March*  
44 466 *2011] The Cochrane Collaboration, 2011*; :33-49.
- 45 467 31. Guyatt GH, Oxman AD, Vist G, et al. GRADE guidelines: 4. Rating the quality of evidence--study  
46 468 limitations (risk of bias). *J Clin Epidemiol* 2011;64(4):407-15. doi:  
47 469 10.1016/j.jclinepi.2010.07.017 [published Online First: 2011/01/21]
- 48 470 32. Guyatt G, Oxman AD, Akl EA, et al. GRADE guidelines: 1. Introduction—GRADE evidence profiles  
49 471 and summary of findings tables. *Journal of Clinical Epidemiology* 2011;64(4):383-94. doi:  
50 472 <https://doi.org/10.1016/j.jclinepi.2010.04.026>
- 51 473 33. Lakhani OJ, Kumar S, Tripathi S, et al. Comparison of Two Protocols in the Management of  
52 474 Glucocorticoid-induced Hyperglycemia among Hospitalized Patients. *Indian journal of*  
53 475 *endocrinology and metabolism* 2017;21(6):836-44. doi: 10.4103/ijem.IJEM\_226\_17 [published  
54 476 Online First: 2017/12/30]



- 1  
2  
3 477 34. Grommesh B, Lausch MJ, Vannelli AJ, et al. HOSPITAL INSULIN PROTOCOL AIMS FOR GLUCOSE  
4 478 CONTROL IN GLUCOCORTICOID-INDUCED HYPERGLYCEMIA. *Endocrine Practice*  
5 479 2015;22(2):180-89. doi: 10.4158/EP15818.OR  
6 480 35. Radhakutty A, Stranks JL, Mangelsdorf BL, et al. Treatment of prednisolone-induced  
7 481 hyperglycaemia in hospitalized patients: Insights from a randomized, controlled study.  
8 482 *Diabetes, obesity & metabolism* 2017;19(4):571-78. doi: 10.1111/dom.12859 [published  
9 483 Online First: 2016/12/21]  
11 484 36. Ruiz de Adana MS, Colomo N, Maldonado-Araque C, et al. Randomized clinical trial of the efficacy  
12 485 and safety of insulin glargine vs. NPH insulin as basal insulin for the treatment of glucocorticoid  
13 486 induced hyperglycemia using continuous glucose monitoring in hospitalized patients with type  
14 487 2 diabetes and respiratory disease. *Diabetes Research and Clinical Practice* 2015;110(2):158-  
15 488 65.  
16 489 37. Gerards MC, de Maar JS, Steenbruggen TG, et al. Add-on treatment with intermediate-acting insulin  
17 490 versus sliding-scale insulin for patients with type 2 diabetes or insulin resistance during cyclic  
18 491 glucocorticoid-containing antineoplastic chemotherapy: a randomized crossover study.  
19 492 *Diabetes, obesity & metabolism* 2016;18(10):1041-4. doi: 10.1111/dom.12694 [published  
20 493 Online First: 2016/05/19]  
22 494 38. Burt MG, Drake SM, Aguilar-Loza NR, et al. Efficacy of a basal bolus insulin protocol to treat  
23 495 prednisolone-induced hyperglycaemia in hospitalised patients. *Internal Medicine Journal*  
24 496 2015;45(3):261-66.  
25 497 39. Dhital SM, Shenker Y, Meredith M, et al. A retrospective study comparing neutral protamine  
26 498 hagedorn insulin with glargine as basal therapy in prednisone-associated diabetes mellitus in  
27 499 hospitalized patients. *Endocrine Practice* 2012;18(5):712-19.  
29 500 40. Gosmanov AR, Goorha S, Stelts S, et al. Management of hyperglycemia in diabetic patients with  
30 501 hematologic malignancies during dexamethasone therapy. *Endocrine Practice* 2013;19(2):231-  
31 502 35.  
32 503 41. Umpierrez GE, Hellman R, Korytkowski MT, et al. Management of hyperglycemia in hospitalized  
33 504 patients in non-critical care setting: an endocrine society clinical practice guideline. *J Clin*  
34 505 *Endocrinol Metab* 2012;97(1):16-38. doi: 10.1210/jc.2011-2098 [published Online First:  
35 506 2012/01/10]  
37 507 42. AmericanDiabetesAssociation. Standards of Medical Care in Diabetes. *Diabetes Care* 2016;39(Suppl  
38 508 1):1-119.  
39 509 43. Management of Hyperglycaemia and Steroid (Glucocorticoid) Therapy. *Joint British Diabetes*  
40 510 *Societies for inpatient care* 2014  
41 511 44. Carol Jairam NO. Steroid Therapy and Management of Hyperglycaemia. 2010  
42 512 45. Malcolm J, Halperin I, Miller DB, et al. In-Hospital Management of Diabetes. *Canadian Journal of*  
43 513 *Diabetes* 2018;42:S115-S23. doi: <https://doi.org/10.1016/j.jcjd.2017.10.014>  
44 514 46. Clore JN, Thurby-Hay L. Glucocorticoid-induced hyperglycemia. *Endocrine practice : official journal*  
45 515 *of the American College of Endocrinology and the American Association of Clinical*  
46 516 *Endocrinologists* 2009;15(5):469-74. doi: 10.4158/ep08331.rar [published Online First:  
47 517 2009/05/21]  
49 518 47. Baldwin D, Apel J. Management of hyperglycemia in hospitalized patients with renal insufficiency  
50 519 or steroid-induced diabetes. *Current Diabetes Reports* 2013;13(1):114-20.  
51 520 48. Suh S, Park MK. Glucocorticoid-Induced Diabetes Mellitus: An Important but Overlooked Problem.  
52 521 *Endocrinology and metabolism (Seoul, Korea)* 2017 [published Online First: 2017/05/31]  
53 522 49. Khazai NB, Hamdy O. Inpatient Diabetes Management in the Twenty-First Century. *Endocrinology*  
54 523 *and Metabolism Clinics of North America* 2016;45(4):875-94. doi:  
55 524 <https://doi.org/10.1016/j.ecl.2016.06.013>  
57 525 50. Gosmanov AR. A practical and evidence-based approach to management of inpatient diabetes in  
58 526 non-critically ill patients and special clinical populations. *Journal of Clinical & Translational*  
59 527 *Endocrinology* 2016;5:1-6. doi: <https://doi.org/10.1016/j.jcte.2016.05.002>  
60

- 1  
2  
3 528 51. Umpierrez GE, Smiley D, Zisman A, et al. Randomized study of basal-bolus insulin therapy in the  
4 529 inpatient management of patients with type 2 diabetes (RABBIT 2 Trial). *Diabetes Care*  
5 530 2007;30(9):2181-86.  
6 531 52. Umpierrez GE, Hellman R, Korytkowski MT, et al. Management of hyperglycemia in hospitalized  
7 532 patients in non-critical care setting: An endocrine society clinical practice guideline. *Journal of*  
8 533 *Clinical Endocrinology and Metabolism* 2012;97(1):16-38.  
9 534 53. Browning LA, Dumo P. Sliding-scale insulin: an antiquated approach to glycemic control in  
10 535 hospitalized patients. *American journal of health-system pharmacy : AJHP : official journal of*  
11 536 *the American Society of Health-System Pharmacists* 2004;61(15):1611-4. [published Online  
12 537 First: 2004/09/18]  
13 538 54. Roberts GW, Aguilar-Loza N, Esterman A, et al. Basal-bolus insulin versus sliding-scale insulin for  
14 539 inpatient glycaemic control: a clinical practice comparison. *The Medical journal of Australia*  
15 540 2012;196(4):266-9. [published Online First: 2012/03/14]  
16 541 55. Brady VJ, Grimes D, Armstrong T, et al. Management of steroid-induced hyperglycemia in  
17 542 hospitalized patients with cancer: a review. *Oncology nursing forum* 2014;41(6):E355-65.  
18 543 56. Lepore M, Pampanelli S, Fanelli C, et al. Pharmacokinetics and pharmacodynamics of subcutaneous  
19 544 injection of long-acting human insulin analog glargine, NPH insulin, and ultralente human  
20 545 insulin and continuous subcutaneous infusion of insulin lispro. *Diabetes* 2000;49(12):2142-8.  
21 546 [published Online First: 2000/12/16]  
22 547 57. Seggelke SA, Gibbs J, Draznin B. Pilot study of using neutral protamine Hagedorn insulin to  
23 548 counteract the effect of methylprednisolone in hospitalized patients with diabetes. *Journal of*  
24 549 *hospital medicine* 2011;6(3):175-6. doi: 10.1002/jhm.874 [published Online First: 2011/03/10]  
25 550 58. Jairam C, Oliver N. Steroid Therapy and Management of Hyperglycaemia. *Imperial College Clinical*  
26 551 *Guidance NHS Trust* 2010 doi: <http://www.imperialendo.co.uk/Steroids>  
27 552 59. Draznin B, Gilden J, Golden SH, et al. Pathways to quality inpatient management of hyperglycemia  
28 553 and diabetes: a call to action. *Diabetes Care* 2013;36(7):1807-14. doi: 10.2337/dc12-2508  
29 554 [published Online First: 2013/06/27]  
30  
31  
32  
33  
34  
35  
36  
37  
38  
39  
40  
41  
42  
43  
44  
45  
46  
47  
48  
49  
50  
51  
52  
53  
54  
55  
56  
57  
58  
59  
60

**Table 1:** Overview of included studies characteristics (alphabetic order)

| First author (year)                                                                                                   | Study population                                                                                                                                       | Prednisolone equiv. Dose (range or SD) mg; duration | Participants n (control/exp.); Age average (range or SD)                                              | Intervention in control group                                                                                                                                                                                                                 | Intervention in experimental group                                                                                                                                                                                                                                                                 |
|-----------------------------------------------------------------------------------------------------------------------|--------------------------------------------------------------------------------------------------------------------------------------------------------|-----------------------------------------------------|-------------------------------------------------------------------------------------------------------|-----------------------------------------------------------------------------------------------------------------------------------------------------------------------------------------------------------------------------------------------|----------------------------------------------------------------------------------------------------------------------------------------------------------------------------------------------------------------------------------------------------------------------------------------------------|
| <b>Randomized control trials</b> (all open-label and parallel-groups, except Gerards <sup>37</sup> cross-over design) |                                                                                                                                                        |                                                     |                                                                                                       |                                                                                                                                                                                                                                               |                                                                                                                                                                                                                                                                                                    |
| Gerards (2016) <sup>37</sup>                                                                                          | In- or outpatients with or without Type 2 DM and hyperglycemia under cyclic glucocorticoid-containing chemotherapy                                     | 50.4 (36.6-55.3)<br>3-4 days per cycle.             | 26 (13/13)<br>• 24 Type 2 DM (13 prior insulin)<br>• 22/26 outpatients<br>67 years (58-71)            | Additional SSI regimen to routine DM medication during prednisone containing cycles<br>• 4 times daily short-acting insulin according to BGL                                                                                                  | Additional IMI regimen during cycles to routine DM medication<br>• IMI single morning dose 0.01 IU/mg per kg prednisolone equivalent, max. 0.5 IU per kg; reduced to 40% in > 70 years or GFR < 60mL/min; daily increases 10% according to BGL                                                     |
| Grommesh (2016) <sup>34</sup>                                                                                         | Inpatients with or without Type 2 DM and hyperglycemia within 24h of glucocorticoids for any indication                                                | 57.2 (±31.5)<br>≤5 days                             | 61 (31/30)<br>• 30 Type 2 DM (prior insulin n/a)<br>64.8 years (±16.1)                                | BBI regimen 1:1 basal and bolus<br>• Basal: insulin glargine<br>• Bolus: prandial insulin lispro<br>• additional correctional insulin aspart<br>• Algorithm for initial dosing based on DM diagnosis, HbA1c and previous treatment (see ref.) | Additional NPH insulin to BBI regimen<br>• NPH along with glucocorticoid (three times if multiple dosing)<br>• Algorithm for NPH doses based on glucocorticoid dose and DM diagnosis                                                                                                               |
| Lakhani (2018) <sup>33</sup>                                                                                          | Inpatients with or without DM (Type 1 or 2) under glucocorticoids for any indication with postprandial hyperglycemia                                   | 20.75 (±12.7)<br>Duration n/a                       | 67 (34/33)<br>• DM (Type and prior insulin n/a) in 14 control / 21 experimental<br>54.2 years (±11.9) | BBI regimen 1:1 basal and bolus, 0.3-0.5 U/kg/d according to HbA1c<br>• Basal: insulin glargine at bedtime<br>• Bolus: prandial insulin lispro<br>• additional correctional insulin lispro                                                    | Additional correctional insulin which matches glycemic profile of the glucocorticoid administered according protocol (see ref) given along with glucocorticoid:<br>• regular insulin with hydrocortisone<br>• NPH with prednisolone or methylprednisolone<br>• Insulin glargine with dexamethasone |
| Radhakutty (2017) <sup>35</sup>                                                                                       | Inpatients with or without Type 2 DM and hyperglycemia under glucocorticoids for COPD, pneumonia, interstitial lung disease or gout.                   | 33 (±9.6)<br>>1 day                                 | 48 (23/25)<br>• 34 Type 2 DM (10 prior insulin)<br>72.1 years (±11.5)                                 | BBI regimen 1:1 basal and bolus, 0.5 U/kg/d<br>• Basal: insulin glargine<br>• Bolus: prandial insulin aspart in three equal doses<br>• additional correctional insulin if needed                                                              | BBI regimen 1:1 basal and bolus<br>• Basal: NPH insulin, morning dose<br>• Bolus: prandial insulin aspart, 20% before breakfast, 40% before lunch and 40% before dinner<br>• additional correctional insulin if needed                                                                             |
| Ruiz de Adana (2016) <sup>36</sup>                                                                                    | Inpatients with Type 2 DM on pneumology under glucocorticoids treatment for respiratory disease.                                                       | appx. 100mg day 1<br>appx. 33mg day 6               | 53 (27/26)<br>• 23 prior insulin<br>68.6 years (±7.3) years                                           | BBI regimen 1:1 basal and bolus, 0.3-0.5 U/kg/d or regular insulin dose multiplied by 1.5<br>• Basal: insulin glargine at 9:00 am<br>• Bolus: prandial insulin glulisine in three equal doses<br>• additional correctional insulin if needed  | BBI regimen 1:1 basal and bolus, 0.3-0.5 U/kg/d or regular insulin dose multiplied by 1.5<br>• Basal: NPH insulin in three equal prandial doses<br>• Bolus: prandial insulin glulisine in three equal doses<br>• additional correctional insulin if needed                                         |
| <b>Observational studies</b> (all retrospective cohort studies)                                                       |                                                                                                                                                        |                                                     |                                                                                                       |                                                                                                                                                                                                                                               |                                                                                                                                                                                                                                                                                                    |
| Burt (2015) <sup>38</sup>                                                                                             | Inpatients with Type 2 DM with or without prednisolone for inflammatory disease                                                                        | 33.2±9.0 day1<br>21.1±7.2 day 5                     | 66 (42/24)<br>• 24 prior insulin<br>75.7 years (±12.9)                                                | BBI regimen 1:1 basal and bolus, 0.3-0.4 U/kg/d<br>• Basal: insulin glargine<br>• Bolus: insulin aspart or lispro or glulisin, divided into three meal time bolus<br>• additional correctional insulin if needed                              | BBI regimen as control and additional prednisolone single morning dose >3 days                                                                                                                                                                                                                     |
| Dhital (2012) <sup>39</sup>                                                                                           | Inpatients with or without Type 2 DM treated with prednisolone at day before discharge; comparison of NPH insulin vs. insulin glargine in BBI regimen. | 31±24.4                                             | 120 (60/60)<br>• 61 Type 2 DM (prior insulin n/a)<br>58 years (±14)                                   | BBI regimen 1:1 basal and bolus<br>• Basal: insulin glargine<br>• Bolus: insulin aspart<br>• additional correctional insulin if needed                                                                                                        | BBI regimen 1:1 basal and bolus insulin<br>• Basal: NPH insulin<br>• Bolus: regular insulin<br>• additional correctional insulin if needed                                                                                                                                                         |

|                                                                                                                                                                                                                                                                         |                                  |                                                                                   |          |                                                       |                                                                                                                                                                                                                           |                                                          |
|-------------------------------------------------------------------------------------------------------------------------------------------------------------------------------------------------------------------------------------------------------------------------|----------------------------------|-----------------------------------------------------------------------------------|----------|-------------------------------------------------------|---------------------------------------------------------------------------------------------------------------------------------------------------------------------------------------------------------------------------|----------------------------------------------------------|
| 1<br>2<br>3<br>4<br>5<br>6<br>7<br>8<br>9<br>10<br>11<br>12<br>13<br>14<br>15<br>16<br>17<br>18<br>19<br>20<br>21<br>22<br>23<br>24<br>25<br>26<br>27<br>28<br>29<br>30<br>31<br>32<br>33<br>34<br>35<br>36<br>37<br>38<br>39<br>40<br>41<br>42<br>43<br>44<br>45<br>46 | Gosmanov (2013)<br><sup>40</sup> | Inpatients with Type 2 DM treated with dexamethasone for hematologic malignancies | 57.2±9.9 | 40 (12/28)<br>• 15 prior insulin<br>56.1 years (±7.8) | BBI regimen 1:1 basal and bolus, 0.33 U/kg/d<br>• Basal: insulin detemir twice daily<br>• Bolus: insulin aspart<br>• additional correctional insulin if needed<br>• daily insulin dose correction if out of target 20-30% | SSI regimen with regular insulin (for protocol see ref.) |
|-------------------------------------------------------------------------------------------------------------------------------------------------------------------------------------------------------------------------------------------------------------------------|----------------------------------|-----------------------------------------------------------------------------------|----------|-------------------------------------------------------|---------------------------------------------------------------------------------------------------------------------------------------------------------------------------------------------------------------------------|----------------------------------------------------------|

BBI: basal-bolus insulin; BGL: blood glucose level; COPD: chronic obstructive pulmonary disease; DM: diabetes mellitus; IMI: intermediate-acting insulin; NPH: Neutral Protamine Hagedorn, isophane insulin; SSI: sliding-scale insulin

For peer review only

Table 2: Outcomes of included original articles (alphabetic order)

| First author <sup>ref</sup>      | Target glucose (mmol/l) | Glycemic control                       |                                        |               |                                                        |                                                        |              | Mean total daily insulin dose (IU/kg/day or U/d) |                          |              | Hypoglycemia <3.9mmol/l      | Hyperglycemia >16.7mmol/l | Other                                            |
|----------------------------------|-------------------------|----------------------------------------|----------------------------------------|---------------|--------------------------------------------------------|--------------------------------------------------------|--------------|--------------------------------------------------|--------------------------|--------------|------------------------------|---------------------------|--------------------------------------------------|
|                                  |                         | Time in target glucose range (%)       |                                        |               | Mean daily BGL (mmol/l)                                |                                                        |              | Control                                          | Exper.                   | p value      |                              |                           |                                                  |
|                                  |                         | Control                                | Exper.                                 | p value       | Control                                                | Exper.                                                 | p value      |                                                  |                          |              |                              |                           |                                                  |
| <b>Randomized control trials</b> |                         |                                        |                                        |               |                                                        |                                                        |              |                                                  |                          |              |                              |                           |                                                  |
| Gerards <sup>37</sup>            | 3.9-10                  | 20.9 <sup>1</sup>                      | 34.3 <sup>1</sup>                      | < 0.001       | 13.5 ± 2.8 <sup>1</sup>                                | 12.4± 2.9 <sup>1</sup>                                 | <0.05        | 26.0 (13.5-63.0)                                 | 40.3 (28.7-61.0)         | 0.01         | mild p=0.21<br>no severe     | n/a                       | Persons prefer SSI/IMI 29/71%                    |
| Grommesh <sup>34</sup>           | 3.9-10                  | 54.6 <sup>2</sup>                      | 62.0 <sup>2</sup>                      | 0.24          | 9.9 ± 1.7 <sup>2</sup>                                 | 9.4±2.0 <sup>2</sup>                                   | 0.17         | 34.8                                             | 35.8                     | 0.13         | 0.1% both groups             | 2.9%, p=0.89              | MAGE p=0.0001                                    |
| Lakhani <sup>33</sup>            | 5.6-10                  | 15.0 <sup>3</sup><br>16.7 <sup>4</sup> | 33.3 <sup>3</sup><br>29.3 <sup>4</sup> | 0.002<br>0.09 | 12.3 ± 2.8 <sup>2</sup>                                | 9.5±1.9 <sup>2</sup>                                   | 0.0001       | n/a                                              | n/a                      | n/a          | mild p=0.3<br>no severe      | 20.7 events,<br>p<0.001   | MAGE p=0.0001                                    |
| Radhakutty <sup>35</sup>         | 4-10                    | 50 <sup>2,5</sup>                      | 58 <sup>2,5</sup>                      | 0.28          | 11.8 <sup>2,5</sup>                                    | 10.5 <sup>2,5</sup>                                    | 0.57         | 0.67±0.08                                        | 0.61±0.04                | 0.57         | mild p=0.92<br>no severe     | n/a                       | MAGE p=0.2                                       |
| Ruiz de Adana <sup>36</sup>      | 4.5-10                  | 42 <sup>1</sup>                        | 38 <sup>1</sup>                        | 0.61          | 10.88 ± 2.99 <sup>1</sup><br>11.43 ± 3.44 <sup>6</sup> | 11.10 ± 3.55 <sup>1</sup><br>11.88 ± 2.94 <sup>6</sup> | 0.62<br>0.97 | 56.9±40.6                                        | 55.4±27.5                | 0.43         | mild p=0.35<br>severe p=0.13 | no events                 | MAGE p=0.377                                     |
| <b>Observational studies</b>     |                         |                                        |                                        |               |                                                        |                                                        |              |                                                  |                          |              |                              |                           |                                                  |
| Burt <sup>38</sup>               | 4-10                    | n/a                                    | n/a                                    | n/a           | 10 ± 0.1 <sup>2</sup>                                  | 12.2 ± 0.3 <sup>2</sup>                                | <0.001       | 0.60-0.65                                        | 0.67-0.70                | 0.001        | all p=0.28<br>no severe      | n/a                       | BGL at 6 and 12 am similar, at 5 and 9 pm higher |
| Dhital <sup>39</sup>             | n/a                     | n/a                                    | n/a                                    | n/a           | 9.2±2.9 <sup>7</sup>                                   | 9.3±2.6 <sup>7</sup>                                   | 0.79         | 0.34 ± 0.2 basal<br>0.36 ± 0.2 bolus             | 0.27 ± 0.2<br>0.26 ± 0.2 | 0.04<br>0.03 | all p=0.77<br>no severe      | n/a                       |                                                  |
| Gosmanov <sup>40</sup>           | 5.6-10                  | n/a                                    | n/a                                    | n/a           | 12.2±2.8 <sup>7</sup>                                  | 16.7±3.2 <sup>7</sup>                                  | <0.001       | 122±39<br>0.63±0.25                              | 49±29<br>0.46±0.16       | <0.001       | no events                    | 3 events exper. group     |                                                  |

BGL: blood glucose level; IMI: intermediate insulin; MAGE: mean amplitude of glycemic excursions; n/a: not applicable; SSI: sliding scale insulin

<sup>1</sup> CGM: continuous glucose monitoring  
<sup>2</sup> capillary blood glucose monitoring four times a day (three times before meals and at bedtime)  
<sup>3</sup> pre-meal blood glucose in target range; pre-meal target range defined as BGL 5.6-7.8 mmol/l;  
<sup>4</sup> bedtime blood glucose in target range; bedtime target range defined as BGL 7.8-9.99 mmol/l;  
<sup>5</sup> approximation, because article indicates ‘time outside target glucose range’  
<sup>6</sup> capillary blood glucose monitoring pre-meal and 2h post-meal  
<sup>7</sup> all available BGL

**FIGURE LEGEND**

**Fig. 1:** Flow diagram of study selection

For peer review only

1  
2  
3  
4  
5  
6  
7  
8  
9  
10  
11  
12  
13  
14  
15  
16  
17  
18  
19  
20  
21  
22  
23  
24  
25  
26  
27  
28  
29  
30  
31  
32  
33  
34  
35  
36  
37  
38  
39  
40  
41  
42  
43  
44  
45  
46

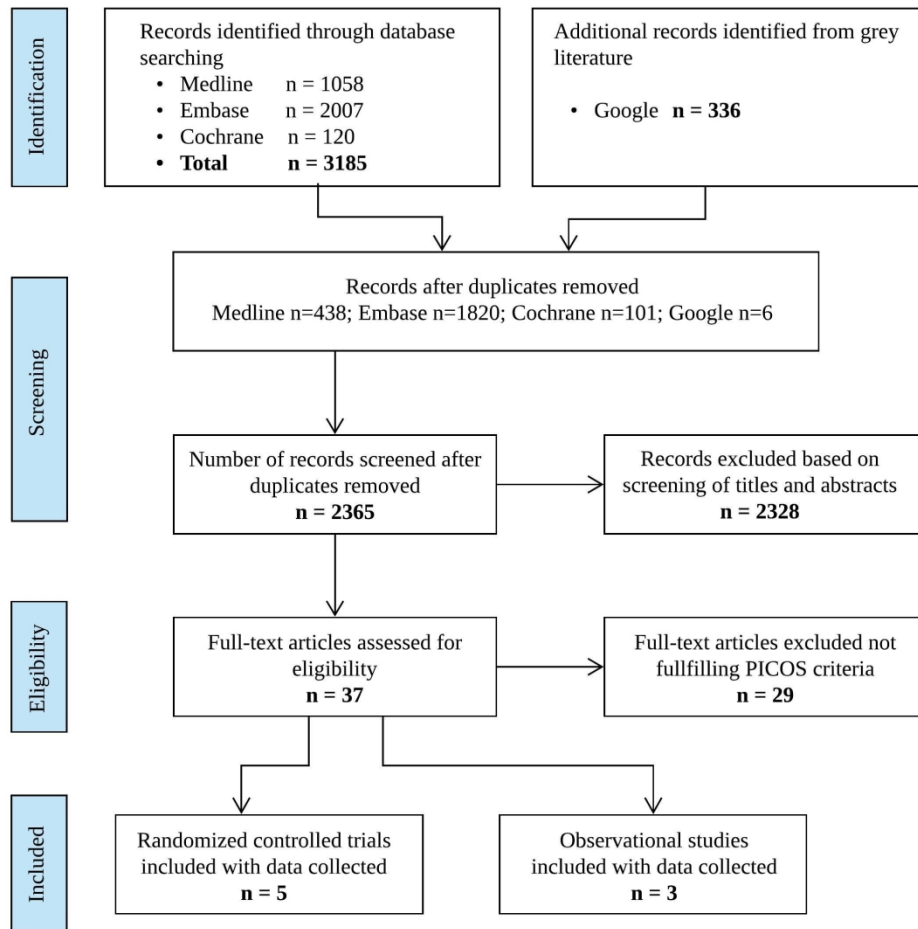

Fig. 1: Flow diagram of study selection

193x198mm (300 x 300 DPI)

1  
2  
3 **Supplementary Table 1: Search strategies**  
4

5 a) OVID search strategy  
6  
7

|    |    |                                                                                                                                                                                                                                                                                                                                                                                                                                                                                                                                                                                                                                                                                                                                                                                                                                                                               |
|----|----|-------------------------------------------------------------------------------------------------------------------------------------------------------------------------------------------------------------------------------------------------------------------------------------------------------------------------------------------------------------------------------------------------------------------------------------------------------------------------------------------------------------------------------------------------------------------------------------------------------------------------------------------------------------------------------------------------------------------------------------------------------------------------------------------------------------------------------------------------------------------------------|
| 8  | 1  | exp Diabetes Mellitus/                                                                                                                                                                                                                                                                                                                                                                                                                                                                                                                                                                                                                                                                                                                                                                                                                                                        |
| 9  | 2  | diabet*.tw.                                                                                                                                                                                                                                                                                                                                                                                                                                                                                                                                                                                                                                                                                                                                                                                                                                                                   |
| 10 | 3  | 1 or 2                                                                                                                                                                                                                                                                                                                                                                                                                                                                                                                                                                                                                                                                                                                                                                                                                                                                        |
| 11 | 4  | hyperglyc*.ab,ti.                                                                                                                                                                                                                                                                                                                                                                                                                                                                                                                                                                                                                                                                                                                                                                                                                                                             |
| 12 | 5  | ((serum* or level* or blood*) adj5 (glucose* or sugar* or level*)).ab,ti.                                                                                                                                                                                                                                                                                                                                                                                                                                                                                                                                                                                                                                                                                                                                                                                                     |
| 13 | 6  | exp Hyperglycemia/                                                                                                                                                                                                                                                                                                                                                                                                                                                                                                                                                                                                                                                                                                                                                                                                                                                            |
| 14 | 7  | exp Blood Glucose/                                                                                                                                                                                                                                                                                                                                                                                                                                                                                                                                                                                                                                                                                                                                                                                                                                                            |
| 15 | 8  | 4 or 5 or 6 or 7                                                                                                                                                                                                                                                                                                                                                                                                                                                                                                                                                                                                                                                                                                                                                                                                                                                              |
| 16 | 9  | 3 and 8                                                                                                                                                                                                                                                                                                                                                                                                                                                                                                                                                                                                                                                                                                                                                                                                                                                                       |
| 17 | 10 | exp Adrenal Cortex Hormones/ad, ae, dt, to [Administration & Dosage, Adverse Effects, Drug Therapy, Toxicity]                                                                                                                                                                                                                                                                                                                                                                                                                                                                                                                                                                                                                                                                                                                                                                 |
| 18 | 11 | exp Steroids/ad, ae, dt, th, to [Administration & Dosage, Adverse Effects, Drug Therapy, Therapy, Toxicity]                                                                                                                                                                                                                                                                                                                                                                                                                                                                                                                                                                                                                                                                                                                                                                   |
| 19 | 12 | ((corti* or predni* or glucocorticoid* or steroid* or 'adrenal cortex hormone' or beclomethasone or betamethasone or budesonide or clobetasol or desoximetasone or dexamethasone or diflucortolone or flumethasone or 'fluocinolone acetonide' or fluocinonide or fluocortolone or fluorometholone or fluprednisolone or flurandrenolone or 'melengestrol acetate' or methylprednisolone or paramethasone or prednisolone or prednisone or triamcinolone or aldosterone or corticosterone or '18 hydroxycorticosterone' or cortisone or cortodoxone or hydrocortisone or tetrahydrocortisol or tetrahydrocortisone or '18 hydroxydesoxycorticosterone' or 'desoxycorticosterone acetate' or '17 alphahydroxypregnenolone' or hydroxysteroid* or finasteride) adj10 (effect* or influenc* or impact* or therap* or medic* or induc* or administ* or dosage or treatm*)).ab,ti. |



|    |                                                                                                                                                                                                                                                                                                                                                                                                                                                                                                                                                                 |
|----|-----------------------------------------------------------------------------------------------------------------------------------------------------------------------------------------------------------------------------------------------------------------------------------------------------------------------------------------------------------------------------------------------------------------------------------------------------------------------------------------------------------------------------------------------------------------|
| 13 | 10 or 11 or 12                                                                                                                                                                                                                                                                                                                                                                                                                                                                                                                                                  |
| 14 | exp Hypoglycemic Agents/                                                                                                                                                                                                                                                                                                                                                                                                                                                                                                                                        |
| 15 | (intensive insulin or glucose or basal bolus or basal-bolus or multiple-dose insulin or basal insulin or prandial insulin or continuous subcutaneous insulin infusion or acetoexamide or biphasic insulins or buformin or butoxamine or carbutamide or chlorpropamide or gliclazide or glipizide or glyburide or insulin* or insulin aspart or insulin lispro or isophane insulin or lente insulin or long-acting insulin or regular pork insulin or short-acting insulin or ultralente insulin or metformin or phenformin or tolazamide or tolbutamide).ab,ti. |
| 16 | 14 or 15                                                                                                                                                                                                                                                                                                                                                                                                                                                                                                                                                        |
| 17 | exp Guideline/                                                                                                                                                                                                                                                                                                                                                                                                                                                                                                                                                  |
| 18 | ((glyc* or hyperglyc* or diab* or gluco* or clinic*) adj10 (guide* or manage* or contro* or treatm* or therap* or protoc* or 'expert opinion' or target* or adjust* or admin* or chang* or regim* or requir* or monitor*)).ab,ti.                                                                                                                                                                                                                                                                                                                               |
| 19 | ((treat* or diseas* or therap* or proced* or proto* or clinic*) adj10 (guid* or sugg* or advice* or recommend* or manage* or rule* or outline* or princip* or 'evidence based' or contro* or 'expert opinion' or regim*)).ab,ti.                                                                                                                                                                                                                                                                                                                                |
| 20 | 17 or 18 or 19                                                                                                                                                                                                                                                                                                                                                                                                                                                                                                                                                  |
| 21 | 9 and 13 and 16 and 20                                                                                                                                                                                                                                                                                                                                                                                                                                                                                                                                          |
| 22 | limit 21 to animals                                                                                                                                                                                                                                                                                                                                                                                                                                                                                                                                             |
| 23 | limit 22 to humans                                                                                                                                                                                                                                                                                                                                                                                                                                                                                                                                              |
| 24 | 22 not 23                                                                                                                                                                                                                                                                                                                                                                                                                                                                                                                                                       |
| 25 | 21 not 24                                                                                                                                                                                                                                                                                                                                                                                                                                                                                                                                                       |
| 26 | limit 25 to yr="2001 -Current"                                                                                                                                                                                                                                                                                                                                                                                                                                                                                                                                  |

## b) EMBASE and Cochrane library search strategy

|    |                                                                                                                                                                                                                                                                                                                                                                                                                                                                                                                                                                                                                                                                                                                                                                                                                                                                                |
|----|--------------------------------------------------------------------------------------------------------------------------------------------------------------------------------------------------------------------------------------------------------------------------------------------------------------------------------------------------------------------------------------------------------------------------------------------------------------------------------------------------------------------------------------------------------------------------------------------------------------------------------------------------------------------------------------------------------------------------------------------------------------------------------------------------------------------------------------------------------------------------------|
| 1  | 'diabetes mellitus'/exp                                                                                                                                                                                                                                                                                                                                                                                                                                                                                                                                                                                                                                                                                                                                                                                                                                                        |
| 2  | diabet*                                                                                                                                                                                                                                                                                                                                                                                                                                                                                                                                                                                                                                                                                                                                                                                                                                                                        |
| 3  | #1 OR #2                                                                                                                                                                                                                                                                                                                                                                                                                                                                                                                                                                                                                                                                                                                                                                                                                                                                       |
| 4  | hyperglyc*:ab,ti                                                                                                                                                                                                                                                                                                                                                                                                                                                                                                                                                                                                                                                                                                                                                                                                                                                               |
| 5  | ((serum* OR blood* OR level*) NEAR/5 (glucose* OR sugar* OR level*)):ab,ti                                                                                                                                                                                                                                                                                                                                                                                                                                                                                                                                                                                                                                                                                                                                                                                                     |
| 6  | 'hyperglycemia'/exp                                                                                                                                                                                                                                                                                                                                                                                                                                                                                                                                                                                                                                                                                                                                                                                                                                                            |
| 7  | 'blood glucose level'/exp                                                                                                                                                                                                                                                                                                                                                                                                                                                                                                                                                                                                                                                                                                                                                                                                                                                      |
| 8  | #4 OR #5 OR #6 OR #7                                                                                                                                                                                                                                                                                                                                                                                                                                                                                                                                                                                                                                                                                                                                                                                                                                                           |
| 9  | #3 AND #8                                                                                                                                                                                                                                                                                                                                                                                                                                                                                                                                                                                                                                                                                                                                                                                                                                                                      |
| 10 | 'corticosteroid'/exp/dd_do,dd_dt,dd_ae,dd_to,dd_ad,dd_it                                                                                                                                                                                                                                                                                                                                                                                                                                                                                                                                                                                                                                                                                                                                                                                                                       |
| 11 | ((corti* OR predni* OR glucocorticoid* OR steroid* OR 'adrenal cortex hormone' OR beclomethasone OR betamethasone OR budesonide OR clobetasol OR desoximetasone OR dexamethasone OR diflucortolone OR flumethasone OR 'fluocinolone acetonide' OR fluocinonide OR fluocortolone OR fluorometholone OR fluprednisolone OR flurandrenolone OR 'melengestrol acetate' OR methylprednisolone OR paramethasone OR prednisolone OR prednisone OR triamcinolone OR aldosterone OR corticosterone OR '18 hydroxycorticosterone' OR cortisone OR cortodoxone OR hydrocortisone OR tetrahydrocortisol OR tetrahydrocortisone OR '18 hydroxydesoxycorticosterone' OR 'desoxycorticosterone acetate' OR '17 alphahydroxypregnenolone' OR hydroxysteroid* OR finasteride) NEAR/10 (effect* OR influenc* OR impact* OR therap* OR medic* OR induc* OR administ* OR dosage OR treatm*)):ab,ti |
| 12 | #10 OR #11                                                                                                                                                                                                                                                                                                                                                                                                                                                                                                                                                                                                                                                                                                                                                                                                                                                                     |

|    |                                                                                                                                                                                                                                                                                                                                                                                                                                                                                                                                                                                                                                                                                                                                                                          |
|----|--------------------------------------------------------------------------------------------------------------------------------------------------------------------------------------------------------------------------------------------------------------------------------------------------------------------------------------------------------------------------------------------------------------------------------------------------------------------------------------------------------------------------------------------------------------------------------------------------------------------------------------------------------------------------------------------------------------------------------------------------------------------------|
| 13 | 'antidiabetic agent'/exp                                                                                                                                                                                                                                                                                                                                                                                                                                                                                                                                                                                                                                                                                                                                                 |
| 14 | 'intensive insulin':ab,ti OR glucose:ab,ti OR 'basal bolus':ab,ti OR 'basal-bolus':ab,ti OR 'multiple-dose insulin':ab,ti OR 'basal insulin':ab,ti OR 'prandial insulin':ab,ti OR 'continuous subcutaneous insulin infusion':ab,ti OR acetoexamide:ab,ti OR 'biphasic insulins':ab,ti OR buformin:ab,ti OR butoxamine:ab,ti OR carbutamide:ab,ti OR chlorpropamide:ab,ti OR gliclazide:ab,ti OR glipizide:ab,ti OR glyburide:ab,ti OR insul*:ab,ti OR 'insulin aspart':ab,ti OR 'insulin lispro':ab,ti OR 'isophane insulin':ab,ti OR 'lente insulin':ab,ti OR 'long-acting insulin':ab,ti OR 'regular pork insulin':ab,ti OR 'short-acting insulin':ab,ti OR 'ultralente insulin':ab,ti OR metformin:ab,ti OR phenformin:ab,ti OR tolazamide:ab,ti OR tolbutamide:ab,ti |
| 15 | #13 OR #14                                                                                                                                                                                                                                                                                                                                                                                                                                                                                                                                                                                                                                                                                                                                                               |
| 16 | 'practice guideline'/exp                                                                                                                                                                                                                                                                                                                                                                                                                                                                                                                                                                                                                                                                                                                                                 |
| 17 | 'diabetic control'/exp                                                                                                                                                                                                                                                                                                                                                                                                                                                                                                                                                                                                                                                                                                                                                   |
| 18 | ((treat* OR diseas* OR therap* OR proced* OR proto* OR clinic*) NEAR/10 (guid* OR sugg* OR advice* OR recommend* OR manage* OR rule* OR outline* OR princip* OR 'evidence based' OR contro* OR 'expert opinion' OR regim*)):ab,ti                                                                                                                                                                                                                                                                                                                                                                                                                                                                                                                                        |
| 19 | ((glyc* OR hyperglyc* OR diab* OR gluco* OR clinic*) NEAR/10 (guide* OR manage* OR contro* OR treatm* OR therap* OR protoc* OR 'expert opinion' OR target* OR adjust* OR admin* OR chang* OR regim* OR requir* OR monitor*)):ab,ti                                                                                                                                                                                                                                                                                                                                                                                                                                                                                                                                       |
| 20 | #16 OR #17 OR #18 OR #19                                                                                                                                                                                                                                                                                                                                                                                                                                                                                                                                                                                                                                                                                                                                                 |
| 21 | #9 AND #12 AND #15 AND #20                                                                                                                                                                                                                                                                                                                                                                                                                                                                                                                                                                                                                                                                                                                                               |
| 22 | #9 AND #12 AND #15 AND #20 AND [animals]/lim                                                                                                                                                                                                                                                                                                                                                                                                                                                                                                                                                                                                                                                                                                                             |
| 23 | #9 AND #12 AND #15 AND #20 AND [humans]/lim AND [animals]/lim                                                                                                                                                                                                                                                                                                                                                                                                                                                                                                                                                                                                                                                                                                            |
| 24 | #22 NOT #23                                                                                                                                                                                                                                                                                                                                                                                                                                                                                                                                                                                                                                                                                                                                                              |
| 25 | #21 NOT #24                                                                                                                                                                                                                                                                                                                                                                                                                                                                                                                                                                                                                                                                                                                                                              |
| 26 | #25 NOT [conference abstract]/lim                                                                                                                                                                                                                                                                                                                                                                                                                                                                                                                                                                                                                                                                                                                                        |

1  
2  
3  
4 27 #26 AND (2001:py OR 2002:py OR 2003:py OR 2004:py OR 2005:py OR 2006:py OR 2007:py OR 2008:py OR 2009:py OR 2010:py OR 2011:py OR  
5 2012:py OR 2013:py OR 2014:py OR 2015:py OR 2016:py)  
6  
7

8 c) Google advanced search  
9

10 "management" or "steroid therapy" or "guideline" and diabet\* or hypergly\* or corti\* or predni\* or glucocorticoid\* or steroid\* or glycemic  
11 control  
12

13  
14 Restriction to PDF Files.  
15  
16  
17  
18  
19  
20  
21  
22  
23  
24  
25  
26  
27  
28  
29  
30  
31  
32  
33  
34  
35  
36  
37  
38  
39  
40  
41  
42  
43  
44  
45  
46

Supplementary Table 2: Risk of bias

a) Risk of bias in five RCTs for seven domains and four different outcomes: mean BGL, time in target glucose range, insulin dose, hypoglycemia

| Randomized control trials (all open-label and parallel-group {except Gerards 1 cross over design}) |                                                                                                                                                   |                                                                                                                                              |                                                                                                                                               |                                                                                                                                                   |                                                                                                                                                   |                                                                                                                                                   |                                                                                                                                               |
|----------------------------------------------------------------------------------------------------|---------------------------------------------------------------------------------------------------------------------------------------------------|----------------------------------------------------------------------------------------------------------------------------------------------|-----------------------------------------------------------------------------------------------------------------------------------------------|---------------------------------------------------------------------------------------------------------------------------------------------------|---------------------------------------------------------------------------------------------------------------------------------------------------|---------------------------------------------------------------------------------------------------------------------------------------------------|-----------------------------------------------------------------------------------------------------------------------------------------------|
| First author (year)                                                                                | Risk of bias                                                                                                                                      |                                                                                                                                              |                                                                                                                                               |                                                                                                                                                   |                                                                                                                                                   |                                                                                                                                                   |                                                                                                                                               |
|                                                                                                    | Sequence generation                                                                                                                               | Allocation concealment                                                                                                                       | Selective reporting                                                                                                                           | Other sources of bias                                                                                                                             | Blinding (participants and personnel)                                                                                                             | Blinding (outcome assessment)                                                                                                                     | Incomplete outcome data                                                                                                                       |
| Gerards (2016) <sup>1</sup>                                                                        | -Mean BGL: <b>low</b><br>-Time in target range: <b>low</b><br>-Insulin dose: <b>low</b><br>-Hypoglycemia: <b>low</b><br>-Overall: <b>low</b>      | -Mean BGL: <b>low</b><br>-Time in target range: <b>low</b><br>-Insulin dose: <b>low</b><br>-Hypoglycemia: <b>low</b><br>-Overall: <b>low</b> | -Mean BGL: <b>low</b><br>-Time in target range: <b>low</b><br>-Insulin dose: <b>low</b><br>-Hypoglycemia: <b>low</b><br>-Overall: <b>low</b>  | -Mean BGL: <b>low</b><br>-Time in target range: <b>low</b><br>-Insulin dose: <b>low</b><br>-Hypoglycemia: <b>low</b><br>-Overall: <b>low</b>      | -Mean BGL: <b>high</b><br>-Time in target range: <b>high</b><br>-Insulin dose: <b>high</b><br>-Hypoglycemia: <b>high</b><br>-Overall: <b>high</b> | -Mean BGL: <b>low</b><br>-Time in target range: <b>low</b><br>-Insulin dose: <b>high</b><br>-Hypoglycemia: <b>high</b><br>-Overall: <b>n/a</b>    | -Mean BGL: <b>low</b><br>-Time in target range: <b>low</b><br>-Insulin dose: <b>low</b><br>-Hypoglycemia: <b>low</b><br>-Overall: <b>low</b>  |
| Grommesh (2016) <sup>2</sup>                                                                       | -Mean BGL: <b>nk</b><br>-Time in target range: <b>nk</b><br>-Insulin dose: <b>nk</b><br>-Hypoglycemia: <b>nk</b><br>-Overall: <b>nk</b>           | -Mean BGL: <b>nk</b><br>-Time in target range: <b>nk</b><br>-Insulin dose: <b>nk</b><br>-Hypoglycemia: <b>nk</b><br>-Overall: <b>nk</b>      | -Mean BGL: <b>low</b><br>-Time in target range: <b>low</b><br>-Insulin dose: <b>low</b><br>-Hypoglycemia: <b>low</b><br>-Overall: <b>low</b>  | -Mean BGL: <b>high</b><br>-Time in target range: <b>high</b><br>-Insulin dose: <b>high</b><br>-Hypoglycemia: <b>high</b><br>-Overall: <b>high</b> | -Mean BGL: <b>high</b><br>-Time in target range: <b>high</b><br>-Insulin dose: <b>high</b><br>-Hypoglycemia: <b>high</b><br>-Overall: <b>high</b> | -Mean BGL: <b>high</b><br>-Time in target range: <b>high</b><br>-Insulin dose: <b>high</b><br>-Hypoglycemia: <b>high</b><br>-Overall: <b>high</b> | -Mean BGL: <b>low</b><br>-Time in target range: <b>low</b><br>-Insulin dose: <b>low</b><br>-Hypoglycemia: <b>low</b><br>-Overall: <b>low</b>  |
| Lakhani (2018) <sup>3</sup>                                                                        | -Mean BGL: <b>low</b><br>-Time in target range: <b>low</b><br>-Insulin dose: <b>low</b><br>-Hypoglycemia: <b>low</b><br>-Overall: <b>low</b>      | -Mean BGL: <b>nk</b><br>-Time in target range: <b>nk</b><br>-Insulin dose: <b>nk</b><br>-Hypoglycemia: <b>nk</b><br>-Overall: <b>nk</b>      | -Mean BGL: <b>low</b><br>-Time in target range: <b>low</b><br>-Insulin dose: <b>high</b><br>-Hypoglycemia: <b>low</b><br>-Overall: <b>low</b> | -Mean BGL: <b>low</b><br>-Time in target range: <b>low</b><br>-Insulin dose: <b>low</b><br>-Hypoglycemia: <b>low</b><br>-Overall: <b>low</b>      | -Mean BGL: <b>high</b><br>-Time in target range: <b>high</b><br>-Insulin dose: <b>high</b><br>-Hypoglycemia: <b>high</b><br>-Overall: <b>high</b> | -Mean BGL: <b>high</b><br>-Time in target range: <b>high</b><br>-Insulin dose: <b>high</b><br>-Hypoglycemia: <b>high</b><br>-Overall: <b>high</b> | -Mean BGL: <b>low</b><br>-Time in target range: <b>low</b><br>-Insulin dose: <b>high</b><br>-Hypoglycemia: <b>low</b><br>-Overall: <b>low</b> |
| Radhakutty (2017) <sup>4</sup>                                                                     | -Mean BGL: <b>low</b><br>-Time in target range: <b>low</b><br>-Insulin dose: <b>low</b><br>-Hypoglycemia: <b>low</b><br>-Overall: <b>low</b>      | -Mean BGL: <b>low</b><br>-Time in target range: <b>low</b><br>-Insulin dose: <b>low</b><br>-Hypoglycemia: <b>low</b><br>-Overall: <b>low</b> | -Mean BGL: <b>low</b><br>-Time in target range: <b>low</b><br>-Insulin dose: <b>low</b><br>-Hypoglycemia: <b>low</b><br>-Overall: <b>low</b>  | -Mean BGL: <b>low</b><br>-Time in target range: <b>low</b><br>-Insulin dose: <b>low</b><br>-Hypoglycemia: <b>low</b><br>-Overall: <b>low</b>      | -Mean BGL: <b>high</b><br>-Time in target range: <b>high</b><br>-Insulin dose: <b>high</b><br>-Hypoglycemia: <b>high</b><br>-Overall: <b>high</b> | -Mean BGL: <b>high</b><br>-Time in target range: <b>high</b><br>-Insulin dose: <b>high</b><br>-Hypoglycemia: <b>high</b><br>-Overall: <b>high</b> | -Mean BGL: <b>low</b><br>-Time in target range: <b>low</b><br>-Insulin dose: <b>low</b><br>-Hypoglycemia: <b>low</b><br>-Overall: <b>low</b>  |
| Ruiz de Adana (2016) <sup>5</sup>                                                                  | -Mean BGL: <b>high</b><br>-Time in target range: <b>high</b><br>-Insulin dose: <b>high</b><br>-Hypoglycemia: <b>high</b><br>-Overall: <b>high</b> | -Mean BGL: <b>nk</b><br>-Time in target range: <b>nk</b><br>-Insulin dose: <b>nk</b><br>-Hypoglycemia: <b>nk</b><br>-Overall: <b>nk</b>      | -Mean BGL: <b>low</b><br>-Time in target range: <b>low</b><br>-Insulin dose: <b>low</b><br>-Hypoglycemia: <b>low</b><br>-Overall: <b>low</b>  | -Mean BGL: <b>low</b><br>-Time in target range: <b>low</b><br>-Insulin dose: <b>low</b><br>-Hypoglycemia: <b>low</b><br>-Overall: <b>low</b>      | -Mean BGL: <b>high</b><br>-Time in target range: <b>high</b><br>-Insulin dose: <b>high</b><br>-Hypoglycemia: <b>high</b><br>-Overall: <b>high</b> | -Mean BGL: <b>high</b><br>-Time in target range: <b>high</b><br>-Insulin dose: <b>high</b><br>-Hypoglycemia: <b>high</b><br>-Overall: <b>high</b> | -Mean BGL: <b>low</b><br>-Time in target range: <b>low</b><br>-Insulin dose: <b>low</b><br>-Hypoglycemia: <b>low</b><br>-Overall: <b>low</b>  |

nk: not known as either unclear or not reported; n/a: not applicable

b) Risk of bias in three included observational studies. The criteria for risk of bias correspond to the key criteria to assess the methodological quality of nonrandomized studies summarized in Table 2 of the main article in the GRADE guidelines by Guyatt et al.<sup>6</sup>

| <b>Observational studies</b> (all retrospective cohort studies) |                                                                      |                                                        |                                                  |                             |
|-----------------------------------------------------------------|----------------------------------------------------------------------|--------------------------------------------------------|--------------------------------------------------|-----------------------------|
| <b>First author (year)</b>                                      | <b>Risk of bias</b>                                                  |                                                        |                                                  |                             |
|                                                                 | <b>Failure to develop and apply appropriate eligibility criteria</b> | <b>Flawed measurement of both exposure and outcome</b> | <b>Failure to adequately control confounding</b> | <b>Incomplete follow-up</b> |
| Burt (2015) <sup>7</sup>                                        | low                                                                  | low                                                    | low                                              | low                         |
| Dhital (2012) <sup>8</sup>                                      | low                                                                  | low                                                    | high                                             | low                         |
| Gosmanov (2013) <sup>9</sup>                                    | high                                                                 | low                                                    | high                                             | low                         |

Supplementary Table 3: Quality of evidence for mean BGL and time in target glucose range (high, moderate, low or very low)

| First author                      | Limitations/ Risk of bias (serious/not serious) | Inconsistency (Yes/No/not relevant)                        | Indirectness (Yes/No/not relevant)                       | Imprecision (Yes/No/not relevant)                          | Publication bias (likely/unlikely)                                   | Quality of evidence after up-/downgrading      |
|-----------------------------------|-------------------------------------------------|------------------------------------------------------------|----------------------------------------------------------|------------------------------------------------------------|----------------------------------------------------------------------|------------------------------------------------|
| <b>Randomized control trial</b>   |                                                 |                                                            |                                                          |                                                            |                                                                      |                                                |
| Gerards (2016) <sup>1</sup>       | <b>Not serious</b>                              | Mean BGL: <b>No</b><br>Time in target glucose: <b>No</b>   | Mean BGL: <b>No</b><br>Time in target glucose: <b>No</b> | Mean BGL: <b>Yes</b><br>Time in target glucose: <b>Yes</b> | Mean BGL: <b>unlikely</b><br>Time in target glucose: <b>unlikely</b> | <b>High downgrade to moderate</b> <sup>a</sup> |
| Grommesh (2016) <sup>2</sup>      | <b>Serious</b>                                  | Mean BGL: <b>Yes</b><br>Time in target glucose: <b>Yes</b> | Mean BGL: <b>No</b><br>Time in target glucose: <b>No</b> | Mean BGL: <b>No</b><br>Time in target glucose: <b>No</b>   | Mean BGL: <b>likely</b><br>Time in target glucose: <b>likely</b>     | <b>High downgrade to very low</b> <sup>b</sup> |
| Lakhani (2016) <sup>3</sup>       | <b>Serious</b>                                  | Mean BGL: <b>No</b><br>Time in target glucose: <b>No</b>   | Mean BGL: <b>No</b><br>Time in target glucose: <b>No</b> | Mean BGL: <b>No</b><br>Time in target glucose: <b>No</b>   | Mean BGL: <b>unlikely</b><br>Time in target glucose: <b>unlikely</b> | <b>High downgrade to moderate</b> <sup>c</sup> |
| Radhakutty (2016) <sup>4</sup>    | <b>Serious</b>                                  | Mean BGL: <b>No</b><br>Time in target glucose: <b>No</b>   | Mean BGL: <b>No</b><br>Time in target glucose: <b>No</b> | Mean BGL: <b>No</b><br>Time in target glucose: <b>No</b>   | Mean BGL: <b>likely</b><br>Time in target glucose: <b>likely</b>     | <b>High downgrade to low</b> <sup>d</sup>      |
| Ruiz de Adana (2016) <sup>5</sup> | <b>Serious</b>                                  | Mean BGL: <b>No</b><br>Time in target glucose: <b>No</b>   | Mean BGL: <b>No</b><br>Time in target glucose: <b>No</b> | Mean BGL: <b>No</b><br>Time in target glucose: <b>No</b>   | Mean BGL: <b>unlikely</b><br>Time in target glucose: <b>unlikely</b> | <b>High downgrade to moderate</b> <sup>e</sup> |
| <b>Observational studies</b>      |                                                 |                                                            |                                                          |                                                            |                                                                      |                                                |
| Burt (2015) <sup>7</sup>          | <b>Not serious</b>                              | Mean BGL: <b>No</b>                                        | Mean BGL: <b>No</b>                                      | Mean BGL: <b>No</b>                                        | Mean BGL: <b>unlikely</b>                                            | <b>Low</b>                                     |
| Dhital (2012) <sup>8</sup>        | <b>Not serious</b>                              | Mean BGL: <b>No</b>                                        | Mean BGL: <b>No</b>                                      | Mean BGL: <b>No</b>                                        | Mean BGL: <b>unlikely</b>                                            | <b>Low</b>                                     |
| Gosmanov (2013) <sup>9</sup>      | <b>Serious</b>                                  | Mean BGL: <b>No</b>                                        | Mean BGL: <b>No</b>                                      | Mean BGL: <b>No</b>                                        | Mean BGL: <b>unlikely</b>                                            | <b>Low downgrade to very low</b> <sup>f</sup>  |

<sup>a</sup> downgrading because of serious imprecision with lack of CI; <sup>b</sup> downgrading because of serious limitations/risk of bias; lack of blinding and attending physicians were not obliged to follow the study protocol while titrating insulin doses, and inconsistency with small sample groups and publications bias with lack of significant results; <sup>c</sup> downgrading because of serious limitations/risk of bias; lack of blinding; <sup>d</sup> downgrading because of serious limitations/risk of bias; lack of blinding, and industry funding; <sup>e</sup> downgrading because of serious limitations/risk of bias, not randomised sequence generation, lack of allocation concealment; <sup>f</sup> downgrading because of serious limitation in eligibility criteria as “self-reported diagnosis of diabetes”.

## References

1. Gerards MC, de Maar JS, Steenbruggen TG, et al. Add-on treatment with intermediate-acting insulin versus sliding-scale insulin for patients with type 2 diabetes or insulin resistance during cyclic glucocorticoid-containing antineoplastic chemotherapy: a randomized crossover study. *Diabetes, obesity & metabolism* 2016;18(10):1041-4. doi: 10.1111/dom.12694 [published Online First: 2016/05/19]
2. Grommesh B, Lausch MJ, Vannelli AJ, et al. HOSPITAL INSULIN PROTOCOL AIMS FOR GLUCOSE CONTROL IN GLUCOCORTICOID-INDUCED HYPERGLYCEMIA. *Endocrine Practice* 2015;22(2):180-89. doi: 10.4158/EP15818.OR
3. Lakhani OJ, Kumar S, Tripathi S, et al. Comparison of Two Protocols in the Management of Glucocorticoid-induced Hyperglycemia among Hospitalized Patients. *Indian journal of endocrinology and metabolism* 2017;21(6):836-44. doi: 10.4103/ijem.IJEM\_226\_17 [published Online First: 2017/12/30]
4. Radhakutty A, Stranks JL, Mangelsdorf BL, et al. Treatment of prednisolone-induced hyperglycaemia in hospitalized patients: Insights from a randomized, controlled study. *Diabetes, obesity & metabolism* 2017;19(4):571-78. doi: 10.1111/dom.12859 [published Online First: 2016/12/21]
5. Ruiz de Adana MS, Colomo N, Maldonado-Araque C, et al. Randomized clinical trial of the efficacy and safety of insulin glargine vs. NPH insulin as basal insulin for the treatment of glucocorticoid induced hyperglycemia using continuous glucose monitoring in hospitalized patients with type 2 diabetes and respiratory disease. *Diabetes Research and Clinical Practice* 2015;110(2):158-65.
6. Guyatt GH, Oxman AD, Vist G, et al. GRADE guidelines: 4. Rating the quality of evidence--study limitations (risk of bias). *J Clin Epidemiol* 2011;64(4):407-15. doi: 10.1016/j.jclinepi.2010.07.017 [published Online First: 2011/01/21]
7. Burt MG, Drake SM, Aguilar-Loza NR, et al. Efficacy of a basal bolus insulin protocol to treat prednisolone-induced hyperglycaemia in hospitalised patients. *Internal Medicine Journal* 2015;45(3):261-66.
8. Dhital SM, Shenker Y, Meredith M, et al. A retrospective study comparing neutral protamine hagedorn insulin with glargine as basal therapy in prednisone-associated diabetes mellitus in hospitalized patients. *Endocrine Practice* 2012;18(5):712-19.
9. Gosmanov AR, Goorha S, Stelts S, et al. Management of hyperglycemia in diabetic patients with hematologic malignancies during dexamethasone therapy. *Endocrine Practice* 2013;19(2):231-35.



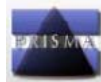

# PRISMA 2009 Checklist

| Section/topic                      | #  | Checklist item                                                                                                                                                                                                                                                                                              | Reported on page # |
|------------------------------------|----|-------------------------------------------------------------------------------------------------------------------------------------------------------------------------------------------------------------------------------------------------------------------------------------------------------------|--------------------|
| <b>TITLE</b>                       |    |                                                                                                                                                                                                                                                                                                             |                    |
| Title                              | 1  | Identify the report as a systematic review, meta-analysis, or both.                                                                                                                                                                                                                                         | 1                  |
| <b>ABSTRACT</b>                    |    |                                                                                                                                                                                                                                                                                                             |                    |
| Structured summary                 | 2  | Provide a structured summary including, as applicable: background; objectives; data sources; study eligibility criteria, participants, and interventions; study appraisal and synthesis methods; results; limitations; conclusions and implications of key findings; systematic review registration number. | 2-3                |
| <b>INTRODUCTION</b>                |    |                                                                                                                                                                                                                                                                                                             |                    |
| Rationale                          | 3  | Describe the rationale for the review in the context of what is already known.                                                                                                                                                                                                                              | 4-5                |
| Objectives                         | 4  | Provide an explicit statement of questions being addressed with reference to participants, interventions, comparisons, outcomes, and study design (PICOS).                                                                                                                                                  | 5-6                |
| <b>METHODS</b>                     |    |                                                                                                                                                                                                                                                                                                             |                    |
| Protocol and registration          | 5  | Indicate if a review protocol exists, if and where it can be accessed (e.g., Web address), and, if available, provide registration information including registration number.                                                                                                                               | 6                  |
| Eligibility criteria               | 6  | Specify study characteristics (e.g., PICOS, length of follow-up) and report characteristics (e.g., years considered, language, publication status) used as criteria for eligibility, giving rationale.                                                                                                      | 6                  |
| Information sources                | 7  | Describe all information sources (e.g., databases with dates of coverage, contact with study authors to identify additional studies) in the search and date last searched.                                                                                                                                  | 7                  |
| Search                             | 8  | Present full electronic search strategy for at least one database, including any limits used, such that it could be repeated.                                                                                                                                                                               | Suppl Tbl 1        |
| Study selection                    | 9  | State the process for selecting studies (i.e., screening, eligibility, included in systematic review, and, if applicable, included in the meta-analysis).                                                                                                                                                   | 7-8                |
| Data collection process            | 10 | Describe method of data extraction from reports (e.g., piloted forms, independently, in duplicate) and any processes for obtaining and confirming data from investigators.                                                                                                                                  | 8                  |
| Data items                         | 11 | List and define all variables for which data were sought (e.g., PICOS, funding sources) and any assumptions and simplifications made.                                                                                                                                                                       | 8                  |
| Risk of bias in individual studies | 12 | Describe methods used for assessing risk of bias of individual studies (including specification of whether this was done at the study or outcome level), and how this information is to be used in any data synthesis.                                                                                      | 8                  |
| Summary measures                   | 13 | State the principal summary measures (e.g., risk ratio, difference in means).                                                                                                                                                                                                                               | n.a.               |
| Synthesis of results               | 14 | Describe the methods of handling data and combining results of studies, if done, including measures of consistency (e.g., $I^2$ ) for each meta-analysis.                                                                                                                                                   | n.a.               |

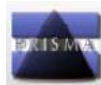

# PRISMA 2009 Checklist

| Section/topic                 | #  | Checklist item                                                                                                                                                                                           | Reported on page #       |
|-------------------------------|----|----------------------------------------------------------------------------------------------------------------------------------------------------------------------------------------------------------|--------------------------|
| Risk of bias across studies   | 15 | Specify any assessment of risk of bias that may affect the cumulative evidence (e.g., publication bias, selective reporting within studies).                                                             | 8.                       |
| Additional analyses           | 16 | Describe methods of additional analyses (e.g., sensitivity or subgroup analyses, meta-regression), if done, indicating which were pre-specified.                                                         | n.a.                     |
| <b>RESULTS</b>                |    |                                                                                                                                                                                                          |                          |
| Study selection               | 17 | Give numbers of studies screened, assessed for eligibility, and included in the review, with reasons for exclusions at each stage, ideally with a flow diagram.                                          | 9-10; Fig 1              |
| Study characteristics         | 18 | For each study, present characteristics for which data were extracted (e.g., study size, PICOS, follow-up period) and provide the citations.                                                             | 9-10; Tbl 1              |
| Risk of bias within studies   | 19 | Present data on risk of bias of each study and, if available, any outcome level assessment (see item 12).                                                                                                | 12-13; Suppl Tbl 2 and 3 |
| Results of individual studies | 20 | For all outcomes considered (benefits or harms), present, for each study: (a) simple summary data for each intervention group (b) effect estimates and confidence intervals, ideally with a forest plot. | 10-12; Table 2           |
| Synthesis of results          | 21 | Present results of each meta-analysis done, including confidence intervals and measures of consistency.                                                                                                  | n.a.                     |
| Risk of bias across studies   | 22 | Present results of any assessment of risk of bias across studies (see Item 15).                                                                                                                          | 9-12                     |
| Additional analysis           | 23 | Give results of additional analyses, if done (e.g., sensitivity or subgroup analyses, meta-regression [see Item 16]).                                                                                    | n.a.                     |
| <b>DISCUSSION</b>             |    |                                                                                                                                                                                                          |                          |
| Summary of evidence           | 24 | Summarize the main findings including the strength of evidence for each main outcome; consider their relevance to key groups (e.g., healthcare providers, users, and policy makers).                     | 14-15                    |
| Limitations                   | 25 | Discuss limitations at study and outcome level (e.g., risk of bias), and at review-level (e.g., incomplete retrieval of identified research, reporting bias).                                            | 16                       |
| Conclusions                   | 26 | Provide a general interpretation of the results in the context of other evidence, and implications for future research.                                                                                  | 16-17                    |
| <b>FUNDING</b>                |    |                                                                                                                                                                                                          |                          |
| Funding                       | 27 | Describe sources of funding for the systematic review and other support (e.g., supply of data); role of funders for the systematic review.                                                               | 17                       |

From: Moher D, Liberati A, Tetzlaff J, Altman DG, The PRISMA Group (2009). Preferred Reporting Items for Systematic Reviews and Meta-Analyses: The PRISMA Statement. PLoS Med 6(7): e1000097. doi:10.1371/journal.pmed1000097

For more information, visit: [www.prisma-statement.org](http://www.prisma-statement.org).
