# Supplementary material for: Management of hyperglycaemia in persons with non-insulin-dependent type 2 diabetes mellitus who are started on systemic glucocorticoid therapy: a systematic review
Source: PubMed Central journal article supplement — BMJ Open. 2019 Jun 1;9(5):e028914. doi: 10.1136/bmjopen-2019-028914 (PMC6549610; doi:10.1136/bmjopen-2019-028914), 2019-06-01
Supplement: bmjopen-2019-028914supp001.pdf [file bmjopen-2019-028914supp001.pdf]

## Supplementary Table 1: Search strategies

### a) OVID search strategy

|    |                                                                                                                                                                                                                                                                                                                                                                                                                                                                                                                                                                                                                                                                                                                                                                                                                                                                              |
|----|------------------------------------------------------------------------------------------------------------------------------------------------------------------------------------------------------------------------------------------------------------------------------------------------------------------------------------------------------------------------------------------------------------------------------------------------------------------------------------------------------------------------------------------------------------------------------------------------------------------------------------------------------------------------------------------------------------------------------------------------------------------------------------------------------------------------------------------------------------------------------|
| 1  | exp Diabetes Mellitus/                                                                                                                                                                                                                                                                                                                                                                                                                                                                                                                                                                                                                                                                                                                                                                                                                                                       |
| 2  | diabet*.tw.                                                                                                                                                                                                                                                                                                                                                                                                                                                                                                                                                                                                                                                                                                                                                                                                                                                                  |
| 3  | 1 or 2                                                                                                                                                                                                                                                                                                                                                                                                                                                                                                                                                                                                                                                                                                                                                                                                                                                                       |
| 4  | hyperglyc*.ab,ti.                                                                                                                                                                                                                                                                                                                                                                                                                                                                                                                                                                                                                                                                                                                                                                                                                                                            |
| 5  | ((serum* or level* or blood*) adj5 (glucose* or sugar* or level*)).ab,ti.                                                                                                                                                                                                                                                                                                                                                                                                                                                                                                                                                                                                                                                                                                                                                                                                    |
| 6  | exp Hyperglycemia/                                                                                                                                                                                                                                                                                                                                                                                                                                                                                                                                                                                                                                                                                                                                                                                                                                                           |
| 7  | exp Blood Glucose/                                                                                                                                                                                                                                                                                                                                                                                                                                                                                                                                                                                                                                                                                                                                                                                                                                                           |
| 8  | 4 or 5 or 6 or 7                                                                                                                                                                                                                                                                                                                                                                                                                                                                                                                                                                                                                                                                                                                                                                                                                                                             |
| 9  | 3 and 8                                                                                                                                                                                                                                                                                                                                                                                                                                                                                                                                                                                                                                                                                                                                                                                                                                                                      |
| 10 | exp Adrenal Cortex Hormones/ad, ae, dt, to [Administration & Dosage, Adverse Effects, Drug Therapy, Toxicity]                                                                                                                                                                                                                                                                                                                                                                                                                                                                                                                                                                                                                                                                                                                                                                |
| 11 | exp Steroids/ad, ae, dt, th, to [Administration & Dosage, Adverse Effects, Drug Therapy, Therapy, Toxicity]                                                                                                                                                                                                                                                                                                                                                                                                                                                                                                                                                                                                                                                                                                                                                                  |
| 12 | ((corti* or predni* or glucocorticoid* or steroid* or 'adrenal cortex hormone' or beclomethasone or betamethasone or budesonide or clobetasol or desoximetasone or dexamethasone or diflucortolone or flumethasone or 'fluocinolone acetonide' or fluocinonide or flucortolone or fluorometholone or fluprednisolone or flurandrenolone or 'melengestrol acetate' or methylprednisolone or paramethasone or prednisolone or prednisone or triamcinolone or aldosterone or corticosterone or '18 hydroxycorticosterone' or cortisone or cortodoxone or hydrocortisone or tetrahydrocortisol or tetrahydrocortisone or '18 hydroxydesoxycorticosterone' or 'desoxycorticosterone acetate' or '17 alphahydroxypregnenolone' or hydroxysteroid* or finasteride) adj10 (effect* or influenc* or impact* or therap* or medic* or induc* or administ* or dosage or treatm*)).ab,ti. |

|    |                                                                                                                                                                                                                                                                                                                                                                                                                                                                                                                                                                  |
|----|------------------------------------------------------------------------------------------------------------------------------------------------------------------------------------------------------------------------------------------------------------------------------------------------------------------------------------------------------------------------------------------------------------------------------------------------------------------------------------------------------------------------------------------------------------------|
| 13 | 10 or 11 or 12                                                                                                                                                                                                                                                                                                                                                                                                                                                                                                                                                   |
| 14 | exp Hypoglycemic Agents/                                                                                                                                                                                                                                                                                                                                                                                                                                                                                                                                         |
| 15 | (intensive insulin or glucose or basal bolus or basal-bolus or multiple-dose insulin or basal insulin or prandial insulin or continuous subcutaneous insulin infusion or acetohexamide or biphasic insulins or buformin or butoxamine or carbutamide or chlorpropamide or gliclazide or glipizide or glyburide or insulin* or insulin aspart or insulin lispro or isophane insulin or lente insulin or long-acting insulin or regular pork insulin or short-acting insulin or ultralente insulin or metformin or phenformin or tolazamide or tolbutamide).ab,ti. |
| 16 | 14 or 15                                                                                                                                                                                                                                                                                                                                                                                                                                                                                                                                                         |
| 17 | exp Guideline/                                                                                                                                                                                                                                                                                                                                                                                                                                                                                                                                                   |
| 18 | ((glyc* or hyperglyc* or diab* or gluco* or clinic*) adj10 (guide* or manage* or contro* or treatm* or therap* or protoc* or 'expert opinion' or target* or adjust* or admin* or chang* or regim* or requir* or monitor*)).ab,ti.                                                                                                                                                                                                                                                                                                                                |
| 19 | ((treat* or diseas* or therap* or proced* or proto* or clinic*) adj10 (guid* or sugg* or advice* or recommend* or manage* or rule* or outline* or princip* or 'evidence based' or contro* or 'expert opinion' or regim*)).ab,ti.                                                                                                                                                                                                                                                                                                                                 |
| 20 | 17 or 18 or 19                                                                                                                                                                                                                                                                                                                                                                                                                                                                                                                                                   |
| 21 | 9 and 13 and 16 and 20                                                                                                                                                                                                                                                                                                                                                                                                                                                                                                                                           |
| 22 | limit 21 to animals                                                                                                                                                                                                                                                                                                                                                                                                                                                                                                                                              |
| 23 | limit 22 to humans                                                                                                                                                                                                                                                                                                                                                                                                                                                                                                                                               |
| 24 | 22 not 23                                                                                                                                                                                                                                                                                                                                                                                                                                                                                                                                                        |
| 25 | 21 not 24                                                                                                                                                                                                                                                                                                                                                                                                                                                                                                                                                        |
| 26 | limit 25 to yr="2001 -Current"                                                                                                                                                                                                                                                                                                                                                                                                                                                                                                                                   |

b) EMBASE and Cochrane library search strategy

|    |                                                                                                                                                                                                                                                                                                                                                                                                                                                                                                                                                                                                                                                                                                                                                                                                                                                                                |
|----|--------------------------------------------------------------------------------------------------------------------------------------------------------------------------------------------------------------------------------------------------------------------------------------------------------------------------------------------------------------------------------------------------------------------------------------------------------------------------------------------------------------------------------------------------------------------------------------------------------------------------------------------------------------------------------------------------------------------------------------------------------------------------------------------------------------------------------------------------------------------------------|
| 1  | 'diabetes mellitus'/exp                                                                                                                                                                                                                                                                                                                                                                                                                                                                                                                                                                                                                                                                                                                                                                                                                                                        |
| 2  | diabet*                                                                                                                                                                                                                                                                                                                                                                                                                                                                                                                                                                                                                                                                                                                                                                                                                                                                        |
| 3  | #1 OR #2                                                                                                                                                                                                                                                                                                                                                                                                                                                                                                                                                                                                                                                                                                                                                                                                                                                                       |
| 4  | hyperglyc*:ab,ti                                                                                                                                                                                                                                                                                                                                                                                                                                                                                                                                                                                                                                                                                                                                                                                                                                                               |
| 5  | ((serum* OR blood* OR level*) NEAR/5 (glucose* OR sugar* OR level*)):ab,ti                                                                                                                                                                                                                                                                                                                                                                                                                                                                                                                                                                                                                                                                                                                                                                                                     |
| 6  | 'hyperglycemia'/exp                                                                                                                                                                                                                                                                                                                                                                                                                                                                                                                                                                                                                                                                                                                                                                                                                                                            |
| 7  | 'blood glucose level'/exp                                                                                                                                                                                                                                                                                                                                                                                                                                                                                                                                                                                                                                                                                                                                                                                                                                                      |
| 8  | #4 OR #5 OR #6 OR #7                                                                                                                                                                                                                                                                                                                                                                                                                                                                                                                                                                                                                                                                                                                                                                                                                                                           |
| 9  | #3 AND #8                                                                                                                                                                                                                                                                                                                                                                                                                                                                                                                                                                                                                                                                                                                                                                                                                                                                      |
| 10 | 'corticosteroid'/exp/dd_do,dd_dt,dd_ae,dd_to,dd_ad,dd_it                                                                                                                                                                                                                                                                                                                                                                                                                                                                                                                                                                                                                                                                                                                                                                                                                       |
| 11 | ((corti* OR predni* OR glucocorticoid* OR steroid* OR 'adrenal cortex hormone' OR beclomethasone OR betamethasone OR budesonide OR clobetasol OR desoximetasone OR dexamethasone OR diflucortolone OR flumethasone OR 'fluocinolone acetonide' OR fluocinonide OR fluocortolone OR fluorometholone OR fluprednisolone OR flurandrenolone OR 'melengestrol acetate' OR methylprednisolone OR paramethasone OR prednisolone OR prednisone OR triamcinolone OR aldosterone OR corticosterone OR '18 hydroxycorticosterone' OR cortisone OR cortodoxone OR hydrocortisone OR tetrahydrocortisol OR tetrahydrocortisone OR '18 hydroxydesoxycorticosterone' OR 'desoxycorticosterone acetate' OR '17 alphahydroxypregnenolone' OR hydroxysteroid* OR finasteride) NEAR/10 (effect* OR influenc* OR impact* OR therap* OR medic* OR induc* OR administ* OR dosage OR treatm*)):ab,ti |
| 12 | #10 OR #11                                                                                                                                                                                                                                                                                                                                                                                                                                                                                                                                                                                                                                                                                                                                                                                                                                                                     |

|    |                                                                                                                                                                                                                                                                                                                                                                                                                                                                                                                                                                                                                                                                                                                                                                          |
|----|--------------------------------------------------------------------------------------------------------------------------------------------------------------------------------------------------------------------------------------------------------------------------------------------------------------------------------------------------------------------------------------------------------------------------------------------------------------------------------------------------------------------------------------------------------------------------------------------------------------------------------------------------------------------------------------------------------------------------------------------------------------------------|
| 13 | 'antidiabetic agent'/exp                                                                                                                                                                                                                                                                                                                                                                                                                                                                                                                                                                                                                                                                                                                                                 |
| 14 | 'intensive insulin':ab,ti OR glucose:ab,ti OR 'basal bolus':ab,ti OR 'basal-bolus':ab,ti OR 'multiple-dose insulin':ab,ti OR 'basal insulin':ab,ti OR 'prandial insulin':ab,ti OR 'continuous subcutaneous insulin infusion':ab,ti OR acetoexamide:ab,ti OR 'biphasic insulins':ab,ti OR buformin:ab,ti OR butoxamine:ab,ti OR carbutamide:ab,ti OR chlorpropamide:ab,ti OR gliclazide:ab,ti OR glipizide:ab,ti OR glyburide:ab,ti OR insul*:ab,ti OR 'insulin aspart':ab,ti OR 'insulin lispro':ab,ti OR 'isophane insulin':ab,ti OR 'lente insulin':ab,ti OR 'long-acting insulin':ab,ti OR 'regular pork insulin':ab,ti OR 'short-acting insulin':ab,ti OR 'ultralente insulin':ab,ti OR metformin:ab,ti OR phenformin:ab,ti OR tolazamide:ab,ti OR tolbutamide:ab,ti |
| 15 | #13 OR #14                                                                                                                                                                                                                                                                                                                                                                                                                                                                                                                                                                                                                                                                                                                                                               |
| 16 | 'practice guideline'/exp                                                                                                                                                                                                                                                                                                                                                                                                                                                                                                                                                                                                                                                                                                                                                 |
| 17 | 'diabetic control'/exp                                                                                                                                                                                                                                                                                                                                                                                                                                                                                                                                                                                                                                                                                                                                                   |
| 18 | ((treat* OR diseas* OR therap* OR proced* OR proto* OR clinic*) NEAR/10 (guid* OR sugg* OR advice* OR recommend* OR manage* OR rule* OR outline* OR princip* OR 'evidence based' OR contro* OR 'expert opinion' OR regim*)):ab,ti                                                                                                                                                                                                                                                                                                                                                                                                                                                                                                                                        |
| 19 | ((glyc* OR hyperglyc* OR diab* OR gluco* OR clinic*) NEAR/10 (guide* OR manage* OR contro* OR treatm* OR therap* OR protoc* OR 'expert opinion' OR target* OR adjust* OR admin* OR chang* OR regim* OR requir* OR monitor*)):ab,ti                                                                                                                                                                                                                                                                                                                                                                                                                                                                                                                                       |
| 20 | #16 OR #17 OR #18 OR #19                                                                                                                                                                                                                                                                                                                                                                                                                                                                                                                                                                                                                                                                                                                                                 |
| 21 | #9 AND #12 AND #15 AND #20                                                                                                                                                                                                                                                                                                                                                                                                                                                                                                                                                                                                                                                                                                                                               |
| 22 | #9 AND #12 AND #15 AND #20 AND [animals]/lim                                                                                                                                                                                                                                                                                                                                                                                                                                                                                                                                                                                                                                                                                                                             |
| 23 | #9 AND #12 AND #15 AND #20 AND [humans]/lim AND [animals]/lim                                                                                                                                                                                                                                                                                                                                                                                                                                                                                                                                                                                                                                                                                                            |
| 24 | #22 NOT #23                                                                                                                                                                                                                                                                                                                                                                                                                                                                                                                                                                                                                                                                                                                                                              |
| 25 | #21 NOT #24                                                                                                                                                                                                                                                                                                                                                                                                                                                                                                                                                                                                                                                                                                                                                              |
| 26 | #25 NOT [conference abstract]/lim                                                                                                                                                                                                                                                                                                                                                                                                                                                                                                                                                                                                                                                                                                                                        |

|    |                                                                                                                                                                                        |
|----|----------------------------------------------------------------------------------------------------------------------------------------------------------------------------------------|
| 27 | #26 AND (2001:py OR 2002:py OR 2003:py OR 2004:py OR 2005:py OR 2006:py OR 2007:py OR 2008:py OR 2009:py OR 2010:py OR 2011:py OR 2012:py OR 2013:py OR 2014:py OR 2015:py OR 2016:py) |
|----|----------------------------------------------------------------------------------------------------------------------------------------------------------------------------------------|

c) Google advanced search

"management" or "steroid therapy" or "guideline" and diabet\* or hypergly\* or corti\* or predni\* or glucocorticoid\* or steroid\* or glycemic control

Restriction to PDF Files.

## Supplementary Table 2: Risk of bias

a) Risk of bias in five RCTs for seven domains and four different outcomes: mean BGL, time in target glucose range, insulin dose, hypoglycemia

| Randomized control trials (all open-label and parallel-group {except Gerards 1 cross over design}) |                                                                                                                                                   |                                                                                                                                              |                                                                                                                                               |                                                                                                                                                   |                                                                                                                                                   |                                                                                                                                                    |                                                                                                                                               |
|----------------------------------------------------------------------------------------------------|---------------------------------------------------------------------------------------------------------------------------------------------------|----------------------------------------------------------------------------------------------------------------------------------------------|-----------------------------------------------------------------------------------------------------------------------------------------------|---------------------------------------------------------------------------------------------------------------------------------------------------|---------------------------------------------------------------------------------------------------------------------------------------------------|----------------------------------------------------------------------------------------------------------------------------------------------------|-----------------------------------------------------------------------------------------------------------------------------------------------|
| First author (year)                                                                                | Risk of bias                                                                                                                                      |                                                                                                                                              |                                                                                                                                               |                                                                                                                                                   |                                                                                                                                                   |                                                                                                                                                    |                                                                                                                                               |
|                                                                                                    | Sequence generation                                                                                                                               | Allocation concealment                                                                                                                       | Selective reporting                                                                                                                           | Other sources of bias                                                                                                                             | Blinding (participants and personnel)                                                                                                             | Blinding (outcome assessment)                                                                                                                      | Incomplete outcome data                                                                                                                       |
| Gerards (2016) <sup>1</sup>                                                                        | -Mean BGL: <b>low</b><br>-Time in target range: <b>low</b><br>-Insulin dose: <b>low</b><br>-Hypoglycemia: <b>low</b><br>-Overall: <b>low</b>      | -Mean BGL: <b>low</b><br>-Time in target range: <b>low</b><br>-Insulin dose: <b>low</b><br>-Hypoglycemia: <b>low</b><br>-Overall: <b>low</b> | -Mean BGL: <b>low</b><br>-Time in target range: <b>low</b><br>-Insulin dose: <b>low</b><br>-Hypoglycemia: <b>low</b><br>-Overall: <b>low</b>  | -Mean BGL: <b>low</b><br>-Time in target range: <b>low</b><br>-Insulin dose: <b>low</b><br>-Hypoglycemia: <b>low</b><br>-Overall: <b>low</b>      | -Mean BGL: <b>high</b><br>-Time in target range: <b>high</b><br>-Insulin dose: <b>high</b><br>-Hypoglycemia: <b>high</b><br>-Overall: <b>high</b> | -Mean BGL: <b>low</b><br>-Time in target range: <b>low</b><br>-Insulin dose: <b>high</b><br>-Hypoglycemia: <b>high</b><br>-Overall: <b>n/a</b>     | -Mean BGL: <b>low</b><br>-Time in target range: <b>low</b><br>-Insulin dose: <b>low</b><br>-Hypoglycemia: <b>low</b><br>-Overall: <b>low</b>  |
| Grommesh (2016) <sup>2</sup>                                                                       | -Mean BGL: <b>nk</b><br>-Time in target range: <b>nk</b><br>-Insulin dose: <b>nk</b><br>-Hypoglycemia: <b>nk</b><br>-Overall: <b>nk</b>           | -Mean BGL: <b>nk</b><br>-Time in target range: <b>nk</b><br>-Insulin dose: <b>nk</b><br>-Hypoglycemia: <b>nk</b><br>-Overall: <b>nk</b>      | -Mean BGL: <b>low</b><br>-Time in target range: <b>low</b><br>-Insulin dose: <b>low</b><br>-Hypoglycemia: <b>low</b><br>-Overall: <b>low</b>  | -Mean BGL: <b>high</b><br>-Time in target range: <b>high</b><br>-Insulin dose: <b>high</b><br>-Hypoglycemia: <b>high</b><br>-Overall: <b>high</b> | -Mean BGL: <b>high</b><br>-Time in target range: <b>high</b><br>-Insulin dose: <b>high</b><br>-Hypoglycemia: <b>high</b><br>-Overall: <b>high</b> | -Mean BGL: <b>high</b> -Time in target range: <b>high</b><br>-Insulin dose: <b>high</b><br>-Hypoglycemia: <b>high</b> -<br>Overall: <b>high</b>    | -Mean BGL: <b>low</b><br>-Time in target range: <b>low</b><br>-Insulin dose: <b>low</b><br>-Hypoglycemia: <b>low</b><br>-Overall: <b>low</b>  |
| Lakhani (2018) <sup>3</sup>                                                                        | -Mean BGL: <b>low</b><br>-Time in target range: <b>low</b><br>-Insulin dose: <b>low</b><br>-Hypoglycemia: <b>low</b><br>-Overall: <b>low</b>      | -Mean BGL: <b>nk</b><br>-Time in target range: <b>nk</b><br>-Insulin dose: <b>nk</b><br>-Hypoglycemia: <b>nk</b><br>-Overall: <b>nk</b>      | -Mean BGL: <b>low</b><br>-Time in target range: <b>low</b><br>-Insulin dose: <b>high</b><br>-Hypoglycemia: <b>low</b><br>-Overall: <b>low</b> | -Mean BGL: <b>low</b><br>-Time in target range: <b>low</b><br>-Insulin dose: <b>low</b><br>-Hypoglycemia: <b>low</b><br>-Overall: <b>low</b>      | -Mean BGL: <b>high</b><br>-Time in target range: <b>high</b><br>-Insulin dose: <b>high</b><br>-Hypoglycemia: <b>high</b><br>-Overall: <b>high</b> | -Mean BGL: <b>high</b><br>-Time in target range: <b>high</b><br>-Insulin dose: <b>high</b><br>-Hypoglycemia: <b>high</b> -<br>Overall: <b>high</b> | -Mean BGL: <b>low</b><br>-Time in target range: <b>low</b><br>-Insulin dose: <b>high</b><br>-Hypoglycemia: <b>low</b><br>-Overall: <b>low</b> |
| Radhakutty (2017) <sup>4</sup>                                                                     | -Mean BGL: <b>low</b><br>-Time in target range: <b>low</b><br>-Insulin dose: <b>low</b><br>-Hypoglycemia: <b>low</b><br>-Overall: <b>low</b>      | -Mean BGL: <b>low</b><br>-Time in target range: <b>low</b><br>-Insulin dose: <b>low</b><br>-Hypoglycemia: <b>low</b><br>-Overall: <b>low</b> | -Mean BGL: <b>low</b><br>-Time in target range: <b>low</b><br>-Insulin dose: <b>low</b><br>-Hypoglycemia: <b>low</b><br>-Overall: <b>low</b>  | -Mean BGL: <b>low</b><br>-Time in target range: <b>low</b><br>-Insulin dose: <b>low</b><br>-Hypoglycemia: <b>low</b><br>-Overall: <b>low</b>      | -Mean BGL: <b>high</b><br>-Time in target range: <b>high</b><br>-Insulin dose: <b>high</b><br>-Hypoglycemia: <b>high</b><br>-Overall: <b>high</b> | -Mean BGL: <b>high</b><br>-Time in target range: <b>high</b><br>-Insulin dose: <b>high</b><br>-Hypoglycemia: <b>high</b> -<br>Overall: <b>high</b> | -Mean BGL: <b>low</b><br>-Time in target range: <b>low</b><br>-Insulin dose: <b>low</b><br>-Hypoglycemia: <b>low</b><br>-Overall: <b>low</b>  |
| Ruiz de Adana (2016) <sup>5</sup>                                                                  | -Mean BGL: <b>high</b><br>-Time in target range: <b>high</b><br>-Insulin dose: <b>high</b><br>-Hypoglycemia: <b>high</b><br>-Overall: <b>high</b> | -Mean BGL: <b>nk</b><br>-Time in target range: <b>nk</b><br>-Insulin dose: <b>nk</b><br>-Hypoglycemia: <b>nk</b><br>-Overall: <b>nk</b>      | -Mean BGL: <b>low</b><br>-Time in target range: <b>low</b><br>-Insulin dose: <b>low</b><br>-Hypoglycemia: <b>low</b><br>-Overall: <b>low</b>  | -Mean BGL: <b>low</b><br>-Time in target range: <b>low</b><br>-Insulin dose: <b>low</b><br>-Hypoglycemia: <b>low</b><br>-Overall: <b>low</b>      | -Mean BGL: <b>high</b><br>-Time in target range: <b>high</b><br>-Insulin dose: <b>high</b><br>-Hypoglycemia: <b>high</b><br>-Overall: <b>high</b> | -Mean BGL: <b>high</b> -Time in target range: <b>high</b><br>-Insulin dose: <b>high</b><br>-Hypoglycemia: <b>high</b><br>-Overall: <b>high</b>     | -Mean BGL: <b>low</b><br>-Time in target range: <b>low</b><br>-Insulin dose: <b>low</b><br>-Hypoglycemia: <b>low</b><br>-Overall: <b>low</b>  |

nk: not known as either unclear or not reported; n/a: not applicable

b) Risk of bias in three included observational studies. The criteria for risk of bias correspond to the key criteria to assess the methodological quality of nonrandomized studies summarized in Table 2 of the main article in the GRADE guidelines by Guyatt et al.<sup>6</sup>

| <b>Observational studies</b> (all retrospective cohort studies) |                                                                      |                                                        |                                                  |                             |
|-----------------------------------------------------------------|----------------------------------------------------------------------|--------------------------------------------------------|--------------------------------------------------|-----------------------------|
| <b>First author (year)</b>                                      | <b>Risk of bias</b>                                                  |                                                        |                                                  |                             |
|                                                                 | <b>Failure to develop and apply appropriate eligibility criteria</b> | <b>Flawed measurement of both exposure and outcome</b> | <b>Failure to adequately control confounding</b> | <b>Incomplete follow-up</b> |
| Burt (2015) <sup>7</sup>                                        | low                                                                  | low                                                    | low                                              | low                         |
| Dhital (2012) <sup>8</sup>                                      | low                                                                  | low                                                    | high                                             | low                         |
| Gosmanov (2013) <sup>9</sup>                                    | high                                                                 | low                                                    | high                                             | low                         |

**Supplementary Table 3: Quality of evidence for mean BGL and time in target glucose range (high, moderate, low or very low)**

| First author                      | Limitations/ Risk of bias<br>(serious/not serious) | Inconsistency<br>(Yes/No/not relevant)                     | Indirectness<br>(Yes/No/not relevant)                    | Imprecision<br>(Yes/No/not relevant)                       | Publication bias<br>(likely/unlikely)                                | Quality of evidence<br>after up-<br>/downgrading |
|-----------------------------------|----------------------------------------------------|------------------------------------------------------------|----------------------------------------------------------|------------------------------------------------------------|----------------------------------------------------------------------|--------------------------------------------------|
| <b>Randomized control trial</b>   |                                                    |                                                            |                                                          |                                                            |                                                                      |                                                  |
| Gerards (2016) <sup>1</sup>       | <b>Not serious</b>                                 | Mean BGL: <b>No</b><br>Time in target glucose: <b>No</b>   | Mean BGL: <b>No</b><br>Time in target glucose: <b>No</b> | Mean BGL: <b>Yes</b><br>Time in target glucose: <b>Yes</b> | Mean BGL: <b>unlikely</b><br>Time in target glucose: <b>unlikely</b> | <b>High downgrade to moderate</b> <sup>a</sup>   |
| Grommesh (2016) <sup>2</sup>      | <b>Serious</b>                                     | Mean BGL: <b>Yes</b><br>Time in target glucose: <b>Yes</b> | Mean BGL: <b>No</b><br>Time in target glucose: <b>No</b> | Mean BGL: <b>No</b><br>Time in target glucose: <b>No</b>   | Mean BGL: <b>likely</b><br>Time in target glucose: <b>likely</b>     | <b>High downgrade to very low</b> <sup>b</sup>   |
| Lakhani (2016) <sup>3</sup>       | <b>Serious</b>                                     | Mean BGL: <b>No</b><br>Time in target glucose: <b>No</b>   | Mean BGL: <b>No</b><br>Time in target glucose: <b>No</b> | Mean BGL: <b>No</b><br>Time in target glucose: <b>No</b>   | Mean BGL: <b>unlikely</b><br>Time in target glucose: <b>unlikely</b> | <b>High downgrade to moderate</b> <sup>c</sup>   |
| Radhakutty (2016) <sup>4</sup>    | <b>Serious</b>                                     | Mean BGL: <b>No</b><br>Time in target glucose: <b>No</b>   | Mean BGL: <b>No</b><br>Time in target glucose: <b>No</b> | Mean BGL: <b>No</b><br>Time in target glucose: <b>No</b>   | Mean BGL: <b>likely</b><br>Time in target glucose: <b>likely</b>     | <b>High downgrade to low</b> <sup>d</sup>        |
| Ruiz de Adana (2016) <sup>5</sup> | <b>Serious</b>                                     | Mean BGL: <b>No</b><br>Time in target glucose: <b>No</b>   | Mean BGL: <b>No</b><br>Time in target glucose: <b>No</b> | Mean BGL: <b>No</b><br>Time in target glucose: <b>No</b>   | Mean BGL: <b>unlikely</b><br>Time in target glucose: <b>unlikely</b> | <b>High downgrade to moderate</b> <sup>e</sup>   |
| <b>Observational studies</b>      |                                                    |                                                            |                                                          |                                                            |                                                                      |                                                  |
| Burt (2015) <sup>7</sup>          | <b>Not serious</b>                                 | Mean BGL: <b>No</b>                                        | Mean BGL: <b>No</b>                                      | Mean BGL: <b>No</b>                                        | Mean BGL: <b>unlikely</b>                                            | <b>Low</b>                                       |
| Dhital (2012) <sup>8</sup>        | <b>Not serious</b>                                 | Mean BGL: <b>No</b>                                        | Mean BGL: <b>No</b>                                      | Mean BGL: <b>No</b>                                        | Mean BGL: <b>unlikely</b>                                            | <b>Low</b>                                       |
| Gosmanov (2013) <sup>9</sup>      | <b>Serious</b>                                     | Mean BGL: <b>No</b>                                        | Mean BGL: <b>No</b>                                      | Mean BGL: <b>No</b>                                        | Mean BGL: <b>unlikely</b>                                            | <b>Low downgrade to very low</b> <sup>f</sup>    |

<sup>a</sup> downgrading because of serious imprecision with lack of CI; <sup>b</sup> downgrading because of serious limitations/risk of bias; lack of blinding and attending physicians were not obliged to follow the study protocol while titrating insulin doses, and inconsistency with small sample groups and publications bias with lack of significant results; <sup>c</sup> downgrading because of serious limitations/risk of bias; lack of blinding; <sup>d</sup> downgrading because of serious limitations/risk of bias; lack of blinding, and industry funding; <sup>e</sup> downgrading because of serious limitations/risk of bias, not randomised sequence generation, lack of allocation concealment; <sup>f</sup> downgrading because of serious limitation in eligibility criteria as “self-reported diagnosis of diabetes”.

## References

1. Gerards MC, de Maar JS, Steenbruggen TG, et al. Add-on treatment with intermediate-acting insulin versus sliding-scale insulin for patients with type 2 diabetes or insulin resistance during cyclic glucocorticoid-containing antineoplastic chemotherapy: a randomized crossover study. *Diabetes, obesity & metabolism* 2016;18(10):1041-4. doi: 10.1111/dom.12694 [published Online First: 2016/05/19]
2. Grommesh B, Lausch MJ, Vannelli AJ, et al. HOSPITAL INSULIN PROTOCOL AIMS FOR GLUCOSE CONTROL IN GLUCOCORTICOID-INDUCED HYPERGLYCEMIA. *Endocrine Practice* 2015;22(2):180-89. doi: 10.4158/EP15818.OR
3. Lakhani OJ, Kumar S, Tripathi S, et al. Comparison of Two Protocols in the Management of Glucocorticoid-induced Hyperglycemia among Hospitalized Patients. *Indian journal of endocrinology and metabolism* 2017;21(6):836-44. doi: 10.4103/ijem.IJEM\_226\_17 [published Online First: 2017/12/30]
4. Radhakutty A, Stranks JL, Mangelsdorf BL, et al. Treatment of prednisolone-induced hyperglycaemia in hospitalized patients: Insights from a randomized, controlled study. *Diabetes, obesity & metabolism* 2017;19(4):571-78. doi: 10.1111/dom.12859 [published Online First: 2016/12/21]
5. Ruiz de Adana MS, Colomo N, Maldonado-Araque C, et al. Randomized clinical trial of the efficacy and safety of insulin glargine vs. NPH insulin as basal insulin for the treatment of glucocorticoid induced hyperglycemia using continuous glucose monitoring in hospitalized patients with type 2 diabetes and respiratory disease. *Diabetes Research and Clinical Practice* 2015;110(2):158-65.
6. Guyatt GH, Oxman AD, Vist G, et al. GRADE guidelines: 4. Rating the quality of evidence--study limitations (risk of bias). *J Clin Epidemiol* 2011;64(4):407-15. doi: 10.1016/j.jclinepi.2010.07.017 [published Online First: 2011/01/21]
7. Burt MG, Drake SM, Aguilar-Loza NR, et al. Efficacy of a basal bolus insulin protocol to treat prednisolone-induced hyperglycaemia in hospitalised patients. *Internal Medicine Journal* 2015;45(3):261-66.
8. Dhital SM, Shenker Y, Meredith M, et al. A retrospective study comparing neutral protamine hagedorn insulin with glargine as basal therapy in prednisone-associated diabetes mellitus in hospitalized patients. *Endocrine Practice* 2012;18(5):712-19.
9. Gosmanov AR, Goorha S, Stelts S, et al. Management of hyperglycemia in diabetic patients with hematologic malignancies during dexamethasone therapy. *Endocrine Practice* 2013;19(2):231-35.
